# Supplementary material
Source: PubMed Central journal article supplement (PMC7651196)
Supplement: TBSD_A_1838329_SM2019.pdf [file TBSD_A_1838329_SM2019.pdf]

**Computationally validated SARS-CoV-2 CTL and HTL Multi-Patch Vaccines  
designed by reverse epitomics approach, shows potential to cover large  
ethnically distributed human population worldwide**

Sukrit Srivastava<sup>#a,b</sup>, Sonia Verma<sup>c</sup>, Mohit Kamthania<sup>b</sup>, Deepa Agarwal<sup>b</sup>, Ajay Kumar Saxena<sup>a</sup>, Michael Kolbe<sup>d,e</sup>, Sarman Singh<sup>f</sup>, Ashwin Kotnis<sup>f</sup>, Brijesh Rathi<sup>g</sup>, Seema. A. Nayar<sup>h,i</sup>, Ho-Joon Shin<sup>j</sup>, Kapil Vashisht<sup>c</sup>, Kailash C Pandey<sup>c</sup>

- a Molecular Medicine Lab., School of Life Science, Jawaharlal Nehru University, New Delhi, 110067, India.
- b Infection Biology Group, Indian Foundation for Fundamental Research, RaeBareli, 229316, India
- c Parasite-Host Biology Group, Protein Biochemistry & Engineering Lab, ICMR-National Institute of Malaria Research, New Delhi, India
- d Department for Structural Infection Biology, Centre for Structural Systems Biology (CSSB) & Helmholtz-Centre for Infection Research, Notkestraße 85, 22607 Hamburg, Germany.
- e Faculty of Mathematics, Informatics and Natural Sciences, University of Hamburg, Rothenbaumchaussee 19, 20148 Hamburg, Germany.
- f All India Institute of Medical Sciences (AIIMS), 462020, Bhopal, India
- g Laboratory For Translational Chemistry and Drug Discovery, Hansraj College, University of Delhi, Delhi-110007 India
- h Government Medical College, Trivandrum, India
- i Sree Gokulam Medical College, Trivandrum, india
- j Department of Microbiology, School of Medicine, Ajou University, South Korea

#Correspondence should be addressed to S.S. (srivastav.sukrit@gmail.com; admin@iffr.in)

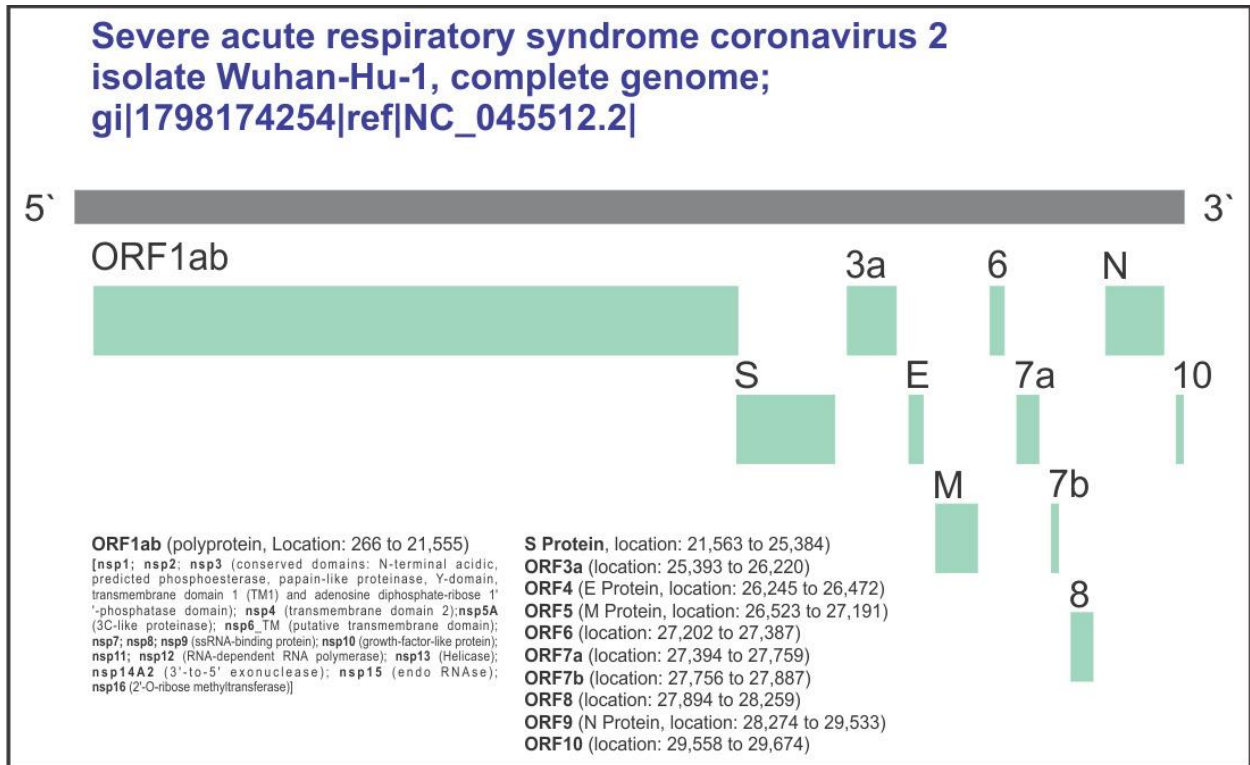

**Supplementary Figure S1.** Schematic presentation of all the ORF protein expressed by SARS-CoV-2 genome.

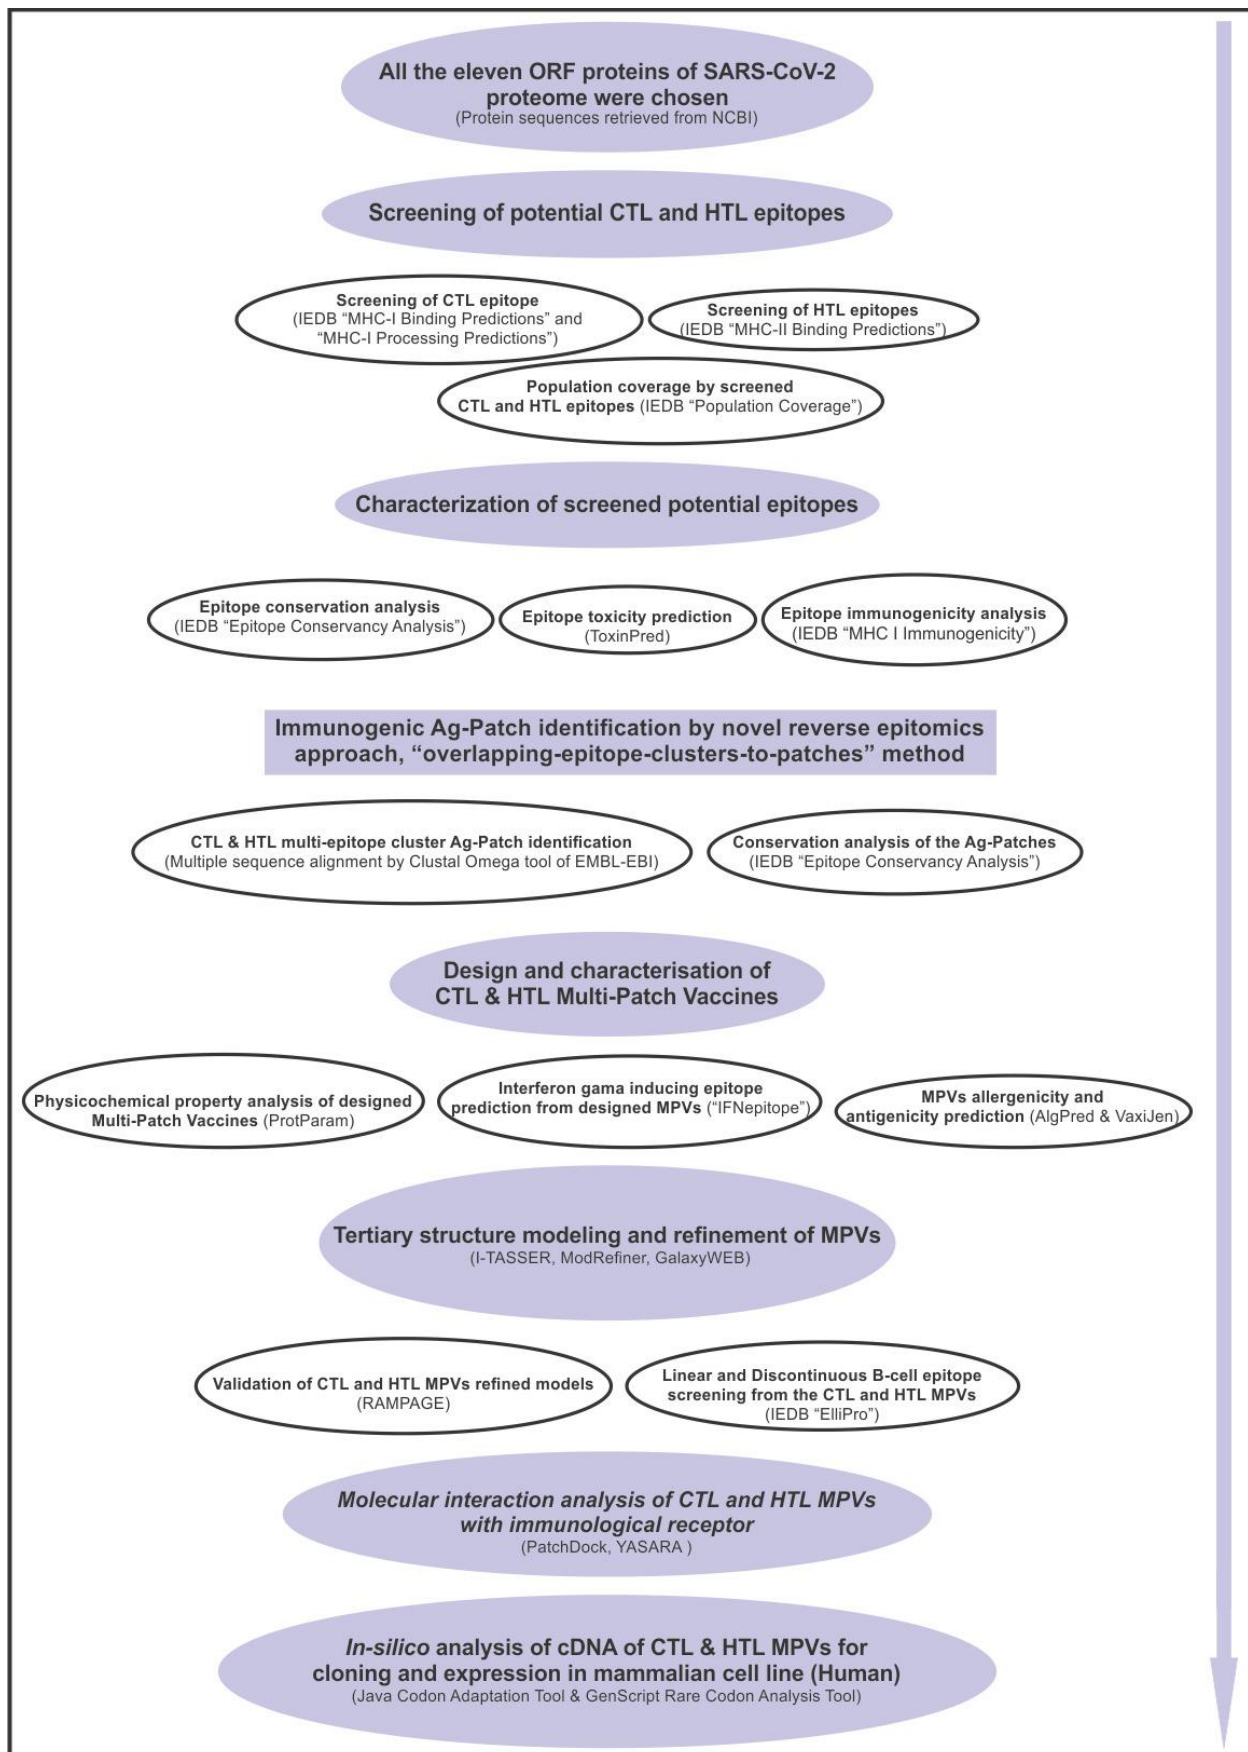

**Supplementary Figure S2.** Schematic representation of workflow and methodology.

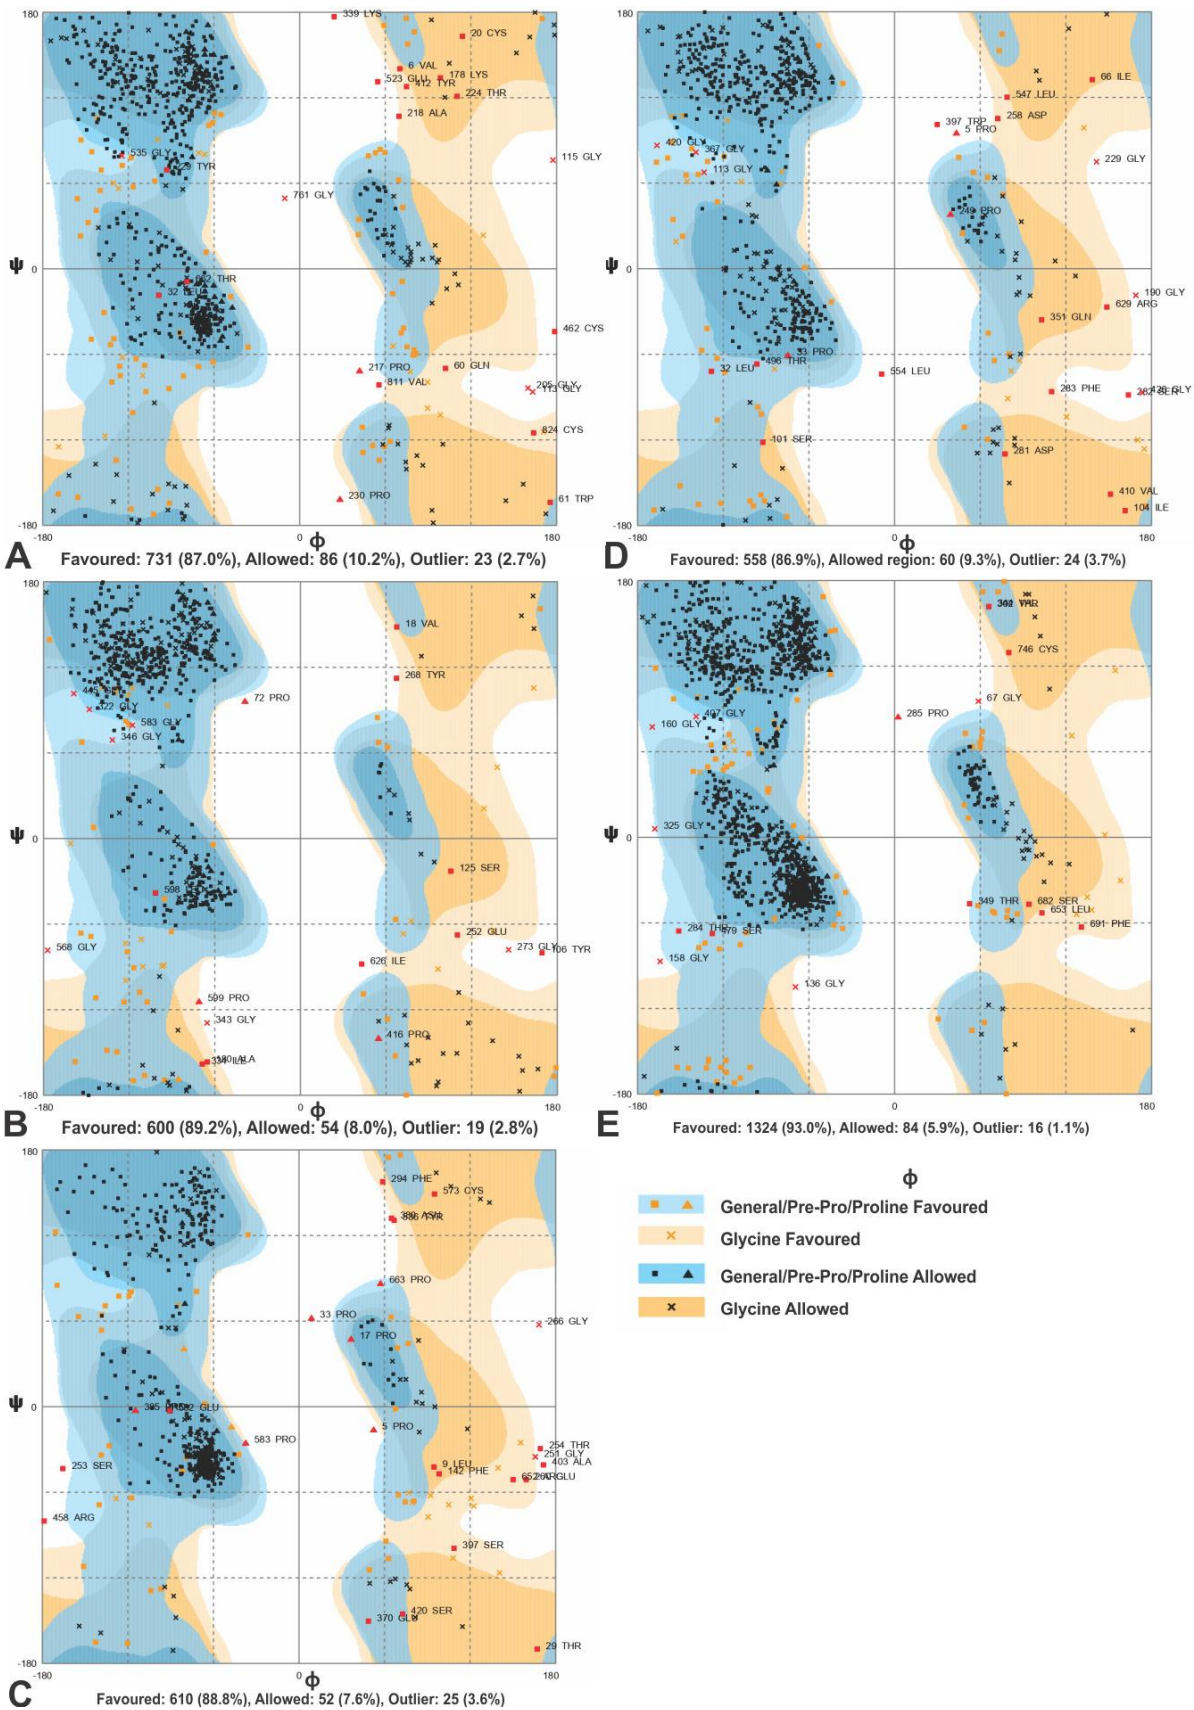

**Supplementary Figure S3.** RAMO analysis for all the MPVs (A) CTL-MPV-1, (B) CTL-MPV-2, (C) CTL-MPV-3, (D) HTL-MPV-1, (E) HTL-MPV-2.



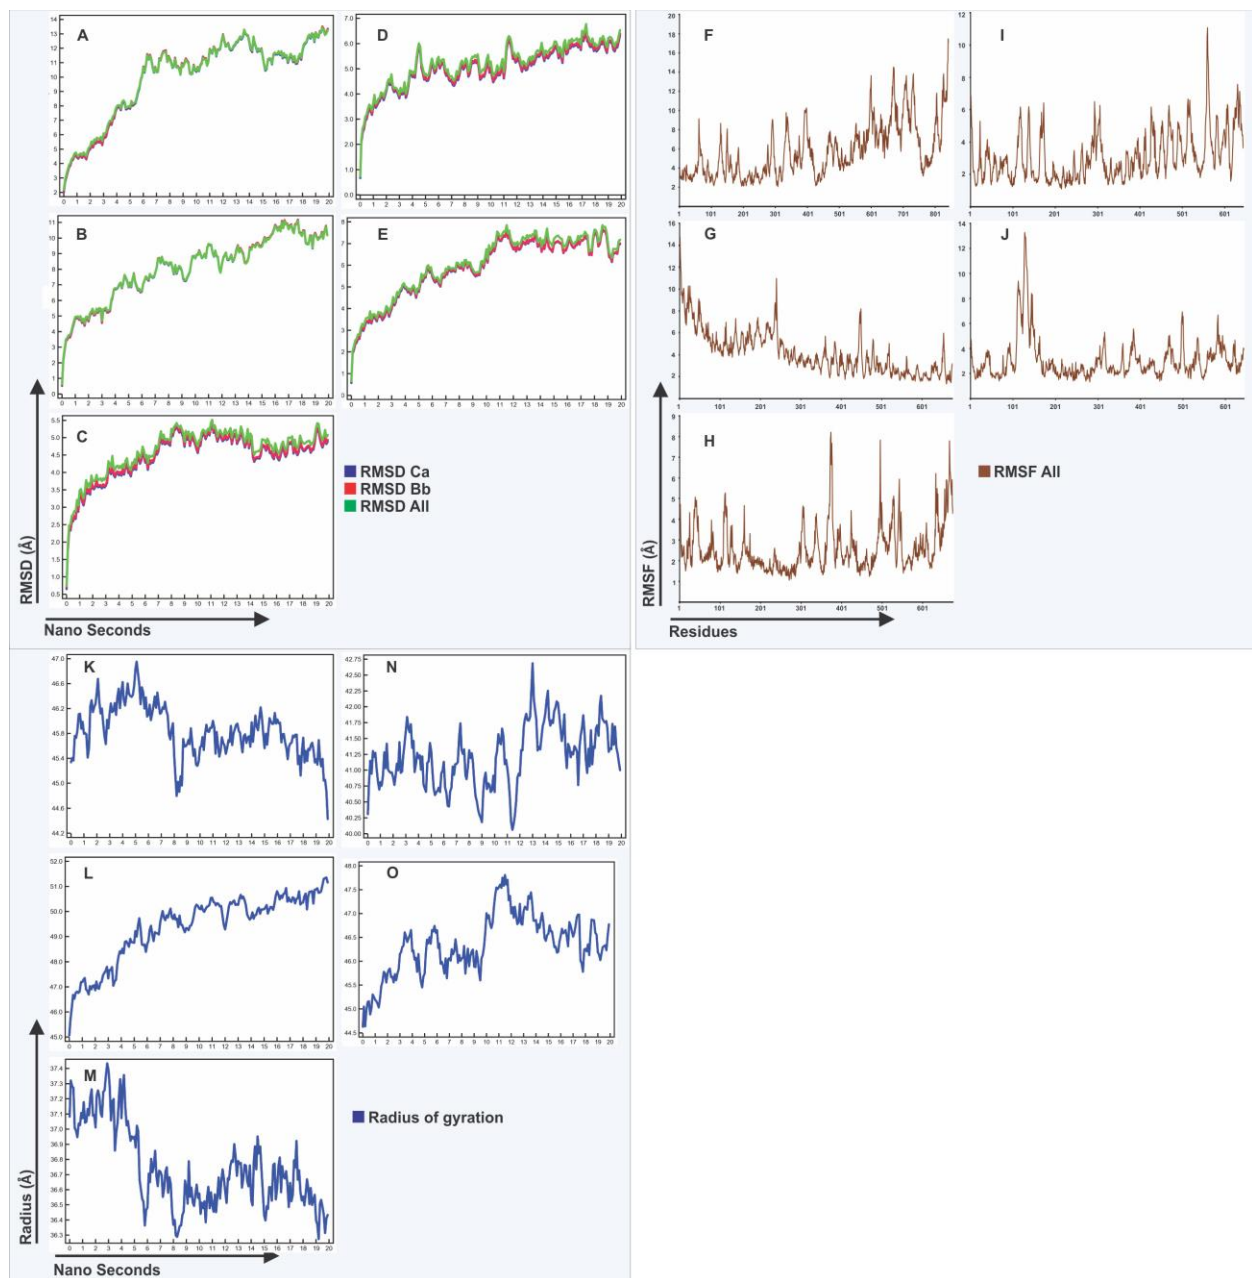

**Supplementary Figure S4.** Molecular Dynamics simulation study of MPVs and TLR3-ECD complexes. (A-E): Root Mean Square Deviation (RMSD) for C $\alpha$ , Backbone and all atoms (RMSD Ca, RMSD Bb, & RMSD All) respectively for (A) CTL-MPV-1:TLR3-ECD, (B) CTL-MPV-2:TLR3-ECD, (C) CTL-MPV-3:TLR3-ECD, (D) HTL-MPV-1:TLR3-ECD, (E) HTL-MPV-2:TLR3-ECD complexes. (F-J) Root Mean Square Fluctuation (RMSF) in the conformation of residues of the MPVs in complex with TLR3-ECD. RMSF: (F) CTL-MPV-1:TLR3-ECD, (G) CTL-MPV-2:TLR3-ECD, (H) CTL-MPV-3:TLR3-ECD, (I) HTL-MPV-1:TLR3-ECD, (J) HTL-MPV-2:TLR3-ECD. (K-O) Radius of gyration for all the MPVs and TLR3-ECD complexes are shown. Rg: (K) CTL-MPV-1:TLR3-ECD, (L) CTL-MPV-2:TLR3-ECD, (M) CTL-MPV-3:TLR3-ECD, (N) HTL-MPV-1:TLR3-ECD, (O) HTL-MPV-2:TLR3-ECD.

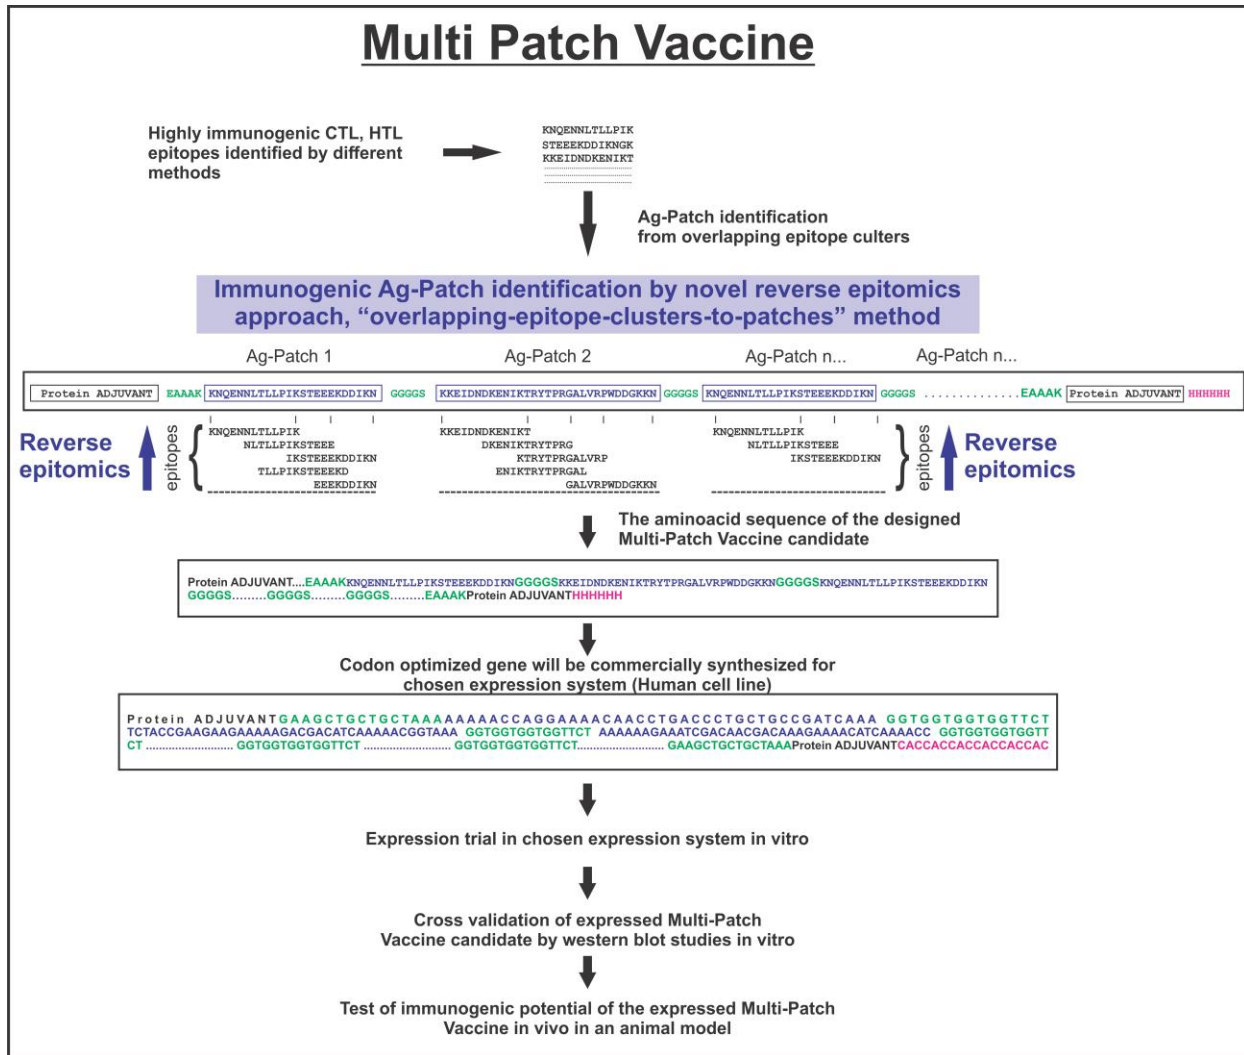

**Supplementary Figure S5.** Work flow concept chart from Ag-Patch (antigenic patch) identification to in vivo trial for the proposed MPVs against SARS-CoV-2.

**Supplementary Table S1:** High Percentile Ranking CTL epitopes-HLA allele pairs screened from entire proteome of SARS-CoV-2 by the “MHC-I Processing Predictions” tool of IEDB. These epitopes were further utilized to identify the potentially immunogenic multiple epitope cluster based CTL Ag-Patches from the entire proteome of the SRAS-CoV-2. The epitopes shown in **RED** are the epitope which form Overlapping epitope clusters. The screened epitopes are in consensus with the previous studies [Srivastava et al. 2020a; Srivastava et al., 2020b and Grifoni et al., 2020a].

| S.No. | ORF       | Allele  | Peptide Length | Peptide     | Immunogenicity | Conservancy     | Toxicity  | Proteasome Score | TAP Score | MHC Score | Processing Score | Total Score | MHC IC50[nM] |
|-------|-----------|---------|----------------|-------------|----------------|-----------------|-----------|------------------|-----------|-----------|------------------|-------------|--------------|
| 1     | E Protein | A*02:01 | 9              | FLAFVVFLL   | 0.30188        | 100.00% (35/35) | Non-Toxin | 1.45             | 0.41      | -0.81     | 1.86             | 1.05        | 6.5          |
| 2     | E Protein | A*02:01 | 9              | FLAFVVFLL   | 0.30188        | 100.00% (35/35) | Non-Toxin | 1.45             | 0.41      | -0.81     | 1.86             | 1.05        | 6.5          |
| 3     | E Protein | A*02:03 | 9              | FLAFVVFLL   | 0.30188        | 100.00% (35/35) | Non-Toxin | 1.45             | 0.41      | -1.17     | 1.86             | 0.69        | 14.9         |
| 4     | E Protein | A*02:06 | 9              | FLAFVVFLL   | 0.30188        | 100.00% (35/35) | Non-Toxin | 1.45             | 0.41      | -1.22     | 1.86             | 0.64        | 16.6         |
| 5     | E Protein | A*02:01 | 9              | FLLVTLAIL   | 0.17608        | 100.00% (35/35) | Non-Toxin | 1.51             | 0.41      | -1.34     | 1.92             | 0.59        | 21.7         |
| 6     | E Protein | A*02:06 | 9              | FVVFLLVTL   | 0.16748        | 100.00% (35/35) | Non-Toxin | 2                | 0.54      | -2.05     | 2.54             | 0.48        | 113.2        |
| 7     | E Protein | B*15:01 | 10             | ILTALRLCAY  | 0.05849        | 97.14% (34/35)  | Non-Toxin | 1.42             | 1.34      | -1.77     | 2.76             | 0.99        | 58.4         |
| 8     | E Protein | A*30:02 | 10             | ILTALRLCAY  | 0.05849        | 97.14% (34/35)  | Non-Toxin | 1.42             | 1.34      | -2.24     | 2.76             | 0.52        | 172.9        |
| 9     | E Protein | B*15:01 | 9              | LIVNSVLLF   | -0.13119       | 100.00% (35/35) | Non-Toxin | 1.15             | 1.2       | -1.38     | 2.35             | 0.97        | 23.8         |
| 10    | E Protein | B*15:01 | 9              | LLFLAFVVF   | 0.2341         | 100.00% (35/35) | Non-Toxin | 1.53             | 1.18      | -2.08     | 2.71             | 0.63        | 120.3        |
| 11    | E Protein | B*15:01 | 9              | LTALRLCAY   | 0.01886        | 97.14% (34/35)  | Non-Toxin | 1.42             | 1.27      | -1.69     | 2.69             | 1           | 49.5         |
| 12    | E Protein | B*15:01 | 9              | LTALRLCAY   | 0.01886        | 97.14% (34/35)  | Non-Toxin | 1.42             | 1.27      | -1.69     | 2.69             | 1           | 49.5         |
| 13    | E Protein | A*30:02 | 9              | LTALRLCAY   | 0.01886        | 97.14% (34/35)  | Non-Toxin | 1.42             | 1.27      | -2.03     | 2.69             | 0.67        | 106          |
| 14    | E Protein | A*01:01 | 9              | LTALRLCAY   | 0.01886        | 97.14% (34/35)  | Non-Toxin | 1.42             | 1.27      | -2.09     | 2.69             | 0.6         | 123.3        |
| 15    | E Protein | B*15:01 | 9              | LVKPSFYVY   | -0.11106       | 100.00% (35/35) | Non-Toxin | 1.51             | 1.35      | -1.42     | 2.86             | 1.44        | 26.3         |
| 16    | E Protein | A*30:02 | 9              | LVKPSFYVY   | -0.11106       | 100.00% (35/35) | Non-Toxin | 1.51             | 1.35      | -1.61     | 2.86             | 1.25        | 40.4         |
| 17    | E Protein | B*15:01 | 9              | LVKPSFYVY   | -0.11106       | 100.00% (35/35) | Non-Toxin | 1.51             | 1.35      | -1.42     | 2.86             | 1.44        | 26.3         |
| 18    | E Protein | A*30:02 | 9              | LVKPSFYVY   | -0.11106       | 100.00% (35/35) | Non-Toxin | 1.51             | 1.35      | -1.61     | 2.86             | 1.25        | 40.4         |
| 19    | E Protein | B*35:01 | 9              | LVKPSFYVY   | -0.11106       | 100.00% (35/35) | Non-Toxin | 1.51             | 1.35      | -1.96     | 2.86             | 0.9         | 90.4         |
| 20    | E Protein | A*31:01 | 9              | RVKNLNSSR   | -0.32968       | 100.00% (35/35) | Non-Toxin | 0.86             | 0.83      | -0.9      | 1.7              | 0.8         | 7.9          |
| 21    | E Protein | B*15:01 | 10             | SLVKPSFYVY  | -0.2443        | 100.00% (35/35) | Non-Toxin | 1.51             | 1.36      | -1.39     | 2.86             | 1.47        | 24.6         |
| 22    | E Protein | B*15:01 | 10             | SLVKPSFYVY  | -0.2443        | 100.00% (35/35) | Non-Toxin | 1.51             | 1.36      | -1.39     | 2.86             | 1.47        | 24.6         |
| 23    | E Protein | A*30:02 | 10             | SLVKPSFYVY  | -0.2443        | 100.00% (35/35) | Non-Toxin | 1.51             | 1.36      | -1.88     | 2.86             | 0.98        | 75.4         |
| 24    | E Protein | A*11:01 | 10             | SLVKPSFYVY  | -0.2443        | 100.00% (35/35) | Non-Toxin | 1.51             | 1.36      | -2.28     | 2.86             | 0.58        | 192.1        |
| 25    | E Protein | A*30:02 | 9              | VSLVKPSFY   | -0.25372       | 100.00% (35/35) | Non-Toxin | 1.19             | 1.38      | -1.74     | 2.58             | 0.84        | 54.9         |
| S.No. | ORF       | Allele  | Peptide Length | Peptide     | Immunogenicity | Conservancy     | Toxicity  | Proteasome Score | TAP Score | MHC Score | Processing Score | Total Score | MHC IC50[nM] |
| 26    | M Protein | A*30:02 | 9              | ATSRTLSTYY  | -0.11604       | 100.00% (41/41) | Non-Toxin | 1.26             | 1.34      | -1.12     | 2.6              | 1.48        | 13.3         |
| 27    | M Protein | A*11:01 | 9              | ATSRTLSTYY  | -0.11604       | 100.00% (41/41) | Non-Toxin | 1.26             | 1.34      | -1.52     | 2.6              | 1.08        | 32.9         |
| 28    | M Protein | B*08:01 | 10             | FARTRSMWSF  | -0.12986       | 100.00% (41/41) | Non-Toxin | 1.41             | 1.12      | -1.34     | 2.53             | 1.19        | 22.1         |
| 29    | M Protein | A*02:01 | 10             | FLWLLWPVTL  | 0.31272        | 100.00% (41/41) | Non-Toxin | 1.85             | 0.46      | -1.16     | 2.31             | 1.16        | 14.3         |
| 30    | M Protein | A*68:01 | 9              | LSYFIASFR   | 0.21181        | 100.00% (41/41) | Non-Toxin | 0.84             | 0.72      | -0.46     | 1.56             | 1.1         | 2.9          |
| 31    | M Protein | A*23:01 | 11             | LSYFIASFRLF | 0.2706         | 100.00% (41/41) | Non-Toxin | 1.25             | 1.18      | -1.36     | 2.43             | 1.07        | 23           |
| 32    | M Protein | A*23:01 | 10             | MWLSYFIASF  | 0.00197        | 100.00% (41/41) | Non-Toxin | 1.38             | 1.26      | -0.91     | 2.63             | 1.73        | 8.1          |
| 33    | M Protein | A*24:02 | 10             | MWLSYFIASF  | 0.00197        | 100.00% (41/41) | Non-Toxin | 1.38             | 1.26      | -1.27     | 2.63             | 1.36        | 18.7         |
| 34    | M Protein | B*15:01 | 10             | MWLSYFIASF  | 0.00197        | 100.00% (41/41) | Non-Toxin | 1.38             | 1.26      | -1.33     | 2.63             | 1.3         | 21.6         |
| 35    | M Protein | A*23:01 | 10             | RFLYIIKLIF  | 0.11728        | 100.00% (41/41) | Non-Toxin | 1.25             | 1.35      | -1.33     | 2.6              | 1.27        | 21.3         |
| 36    | M Protein | A*30:01 | 8              | RTRSMWSF    | -0.25178       | 100.00% (41/41) | Non-Toxin | 1.41             | 1.28      | -1.51     | 2.69             | 1.18        | 32.7         |
| 37    | M Protein | A*30:02 | 9              | SGFAAYSRY   | 0.00261        | 100.00% (41/41) | Non-Toxin | 1.53             | 1.17      | -1.4      | 2.69             | 1.3         | 25           |
| 38    | M Protein | B*15:01 | 10             | SQRVAGDSGF  | 0.0305         | 100.00% (41/41) | Non-Toxin | 1.33             | 1.24      | -1.35     | 2.58             | 1.23        | 22.4         |
| 39    | M Protein | A*23:01 | 9              | SYFIASFRL   | 0.18333        | 100.00% (41/41) | Non-Toxin | 1.45             | 0.62      | -0.99     | 2.08             | 1.09        | 9.8          |
| 40    | M Protein | A*23:01 | 10             | SYFIASFRLF  | 0.19632        | 100.00% (41/41) | Non-Toxin | 1.25             | 1.31      | -0.56     | 2.56             | 2           | 3.6          |
| 41    | M Protein | A*24:02 | 10             | SYFIASFRLF  | 0.19632        | 100.00% (41/41) | Non-Toxin | 1.25             | 1.31      | -0.76     | 2.56             | 1.8         | 5.7          |
| 42    | M Protein | B*35:01 | 9              | VATSRTLSTY  | -0.17295       | 100.00% (41/41) | Non-Toxin | 1.34             | 1.31      | -1.38     | 2.65             | 1.27        | 23.9         |

| 43    | M Protein | B*35:01 | 9              | YANRNRFLY   | 0.18472        | 100.00% (41/41) | Non-Toxin | 1.18             | 1.31      | -0.83     | 2.49             | 1.66        | 6.8          |
|-------|-----------|---------|----------------|-------------|----------------|-----------------|-----------|------------------|-----------|-----------|------------------|-------------|--------------|
| 44    | M Protein | A*30:02 | 9              | YANRNRFLY   | 0.18472        | 100.00% (41/41) | Non-Toxin | 1.18             | 1.31      | -1.46     | 2.49             | 1.03        | 28.9         |
| 45    | M Protein | A*23:01 | 9              | YFIASFRLF   | 0.06887        | 100.00% (41/41) | Non-Toxin | 1.25             | 1.22      | -0.73     | 2.47             | 1.74        | 5.4          |
| 46    | M Protein | A*24:02 | 9              | YFIASFRLF   | 0.06887        | 100.00% (41/41) | Non-Toxin | 1.25             | 1.22      | -1        | 2.47             | 1.48        | 9.9          |
| 47    | M Protein | A*30:02 | 9              | YSRYRIGNY   | 0.21358        | 100.00% (41/41) | Non-Toxin | 1.36             | 1.37      | -1.61     | 2.73             | 1.12        | 40.6         |
| S.No. | ORF       | Allele  | Peptide Length | Peptide     | Immunogenicity | Conservancy     | Toxicity  | Proteasome Score | TAP Score | MHC Score | Processing Score | Total Score | MHC IC50[nM] |
| 48    | N Protein | B*15:01 | 10             | AQFAPSASAF  | -0.17446       | 100.00% (40/40) | Non-Toxin | 1.23             | 1.25      | -0.7      | 2.48             | 1.78        | 5            |
| 49    | N Protein | B*15:01 | 10             | AQFAPSASAF  | -0.17446       | 100.00% (40/40) | Non-Toxin | 1.23             | 1.25      | -0.7      | 2.48             | 1.78        | 5            |
| 50    | N Protein | B*15:01 | 11             | AQFAPSASAFF | -0.11074       | 100.00% (40/40) | Non-Toxin | 1.3              | 1.25      | -1.46     | 2.55             | 1.08        | 29           |
| 51    | N Protein | B*15:01 | 11             | AQFAPSASAFF | -0.11074       | 100.00% (40/40) | Non-Toxin | 1.3              | 1.25      | -1.46     | 2.55             | 1.08        | 29           |
| 52    | N Protein | B*35:01 | 9              | FAPSASAFF   | -0.18628       | 100.00% (40/40) | Non-Toxin | 1.3              | 1.05      | -1.54     | 2.35             | 0.81        | 35           |
| 53    | N Protein | A*30:02 | 9              | GTTLPKGFY   | -0.11536       | 100.00% (40/40) | Non-Toxin | 1.48             | 1.15      | -1.88     | 2.62             | 0.74        | 76.3         |
| 54    | N Protein | B*15:01 | 11             | IAQFAPSASAF | -0.13353       | 100.00% (40/40) | Non-Toxin | 1.23             | 1.1       | -1.84     | 2.33             | 0.49        | 69.1         |
| 55    | N Protein | A*31:01 | 9              | IGYYRRATR   | 0.1499         | 100.00% (40/40) | Non-Toxin | 1.27             | 0.6       | -1.16     | 1.87             | 0.71        | 14.3         |
| 56    | N Protein | A*32:01 | 9              | KAYNVTQAF   | -0.00587       | 100.00% (40/40) | Non-Toxin | 1.21             | 1.25      | -0.98     | 2.46             | 1.48        | 9.5          |
| 57    | N Protein | B*15:01 | 9              | KAYNVTQAF   | -0.00587       | 100.00% (40/40) | Non-Toxin | 1.21             | 1.25      | -1.34     | 2.46             | 1.12        | 21.9         |
| 58    | N Protein | A*32:01 | 9              | KAYNVTQAF   | -0.00587       | 100.00% (40/40) | Non-Toxin | 1.21             | 1.25      | -0.98     | 2.46             | 1.48        | 9.5          |
| 59    | N Protein | B*15:01 | 9              | KAYNVTQAF   | -0.00587       | 100.00% (40/40) | Non-Toxin | 1.21             | 1.25      | -1.34     | 2.46             | 1.12        | 21.9         |
| 60    | N Protein | B*58:01 | 9              | KAYNVTQAF   | -0.00587       | 100.00% (40/40) | Non-Toxin | 1.21             | 1.25      | -1.48     | 2.46             | 0.98        | 30.1         |
| 61    | N Protein | B*35:01 | 9              | KAYNVTQAF   | -0.00587       | 100.00% (40/40) | Non-Toxin | 1.21             | 1.25      | -1.9      | 2.46             | 0.56        | 79.8         |
| 62    | N Protein | A*30:02 | 10             | KDLSPRWYFY  | 0.14332        | 100.00% (40/40) | Non-Toxin | 1.58             | 1.21      | -1.68     | 2.79             | 1.1         | 48.3         |
| 63    | N Protein | A*30:02 | 10             | KDLSPRWYFY  | 0.14332        | 100.00% (40/40) | Non-Toxin | 1.58             | 1.21      | -1.68     | 2.79             | 1.1         | 48.3         |
| 64    | N Protein | A*03:01 | 10             | KDLSPRWYFY  | 0.14332        | 100.00% (40/40) | Non-Toxin | 1.58             | 1.21      | -1.99     | 2.79             | 0.8         | 97.5         |
| 65    | N Protein | A*30:02 | 10             | KMKDLSPRWY  | -0.05692       | 100.00% (40/40) | Non-Toxin | 1.31             | 1.35      | -1.56     | 2.66             | 1.1         | 36.2         |
| 66    | N Protein | A*30:02 | 10             | KMKDLSPRWY  | -0.05692       | 100.00% (40/40) | Non-Toxin | 1.31             | 1.35      | -1.56     | 2.66             | 1.1         | 36.2         |
| 67    | N Protein | B*15:01 | 10             | KMKDLSPRWY  | -0.05692       | 100.00% (40/40) | Non-Toxin | 1.31             | 1.35      | -2.04     | 2.66             | 0.62        | 110.6        |
| 68    | N Protein | A*02:03 | 9              | LLLDRLNQL   | -0.01446       | 100.00% (40/40) | Non-Toxin | 1.48             | 0.46      | -0.89     | 1.94             | 1.05        | 7.7          |
| 69    | N Protein | A*02:03 | 9              | LLLDRLNQL   | -0.01446       | 100.00% (40/40) | Non-Toxin | 1.48             | 0.46      | -0.89     | 1.94             | 1.05        | 7.7          |
| 70    | N Protein | A*02:01 | 9              | LLLDRLNQL   | -0.01446       | 100.00% (40/40) | Non-Toxin | 1.48             | 0.46      | -0.99     | 1.94             | 0.95        | 9.8          |
| 71    | N Protein | A*02:06 | 9              | LLLDRLNQL   | -0.01446       | 100.00% (40/40) | Non-Toxin | 1.48             | 0.46      | -1.11     | 1.94             | 0.83        | 12.8         |
| 72    | N Protein | B*15:01 | 9              | LLNKHIDAY   | -0.02074       | 100.00% (40/40) | Non-Toxin | 1.31             | 1.24      | -1.58     | 2.55             | 0.98        | 37.6         |
| 73    | N Protein | B*35:01 | 9              | LPAADLDDF   | 0.09491        | 100.00% (40/40) | Non-Toxin | 0.94             | 1         | -1.43     | 1.94             | 0.5         | 27.2         |
| 74    | N Protein | B*35:01 | 9              | LPNNTASWF   | 0.05582        | 100.00% (40/40) | Non-Toxin | 1.21             | 0.92      | -1.25     | 2.13             | 0.88        | 17.7         |
| 75    | N Protein | B*53:01 | 9              | LPNNTASWF   | 0.05582        | 100.00% (40/40) | Non-Toxin | 1.21             | 0.92      | -1.51     | 2.13             | 0.62        | 32.7         |
| 76    | N Protein | A*30:02 | 9              | LSPRWYFY    | 0.35734        | 100.00% (40/40) | Non-Toxin | 1.07             | 1.22      | -1.71     | 2.3              | 0.59        | 50.8         |
| 77    | N Protein | B*44:02 | 9              | MEVTPSGTW   | -0.06279       | 100.00% (40/40) | Non-Toxin | 1.44             | 0.37      | -1.26     | 1.8              | 0.54        | 18.2         |
| 78    | N Protein | A*30:02 | 11             | MKDLSPRWYFY | 0.14833        | 100.00% (40/40) | Non-Toxin | 1.58             | 1.28      | -2.31     | 2.86             | 0.55        | 202.5        |
| 79    | N Protein | B*15:01 | 10             | NQRNAPRITF  | 0.22131        | 100.00% (40/40) | Non-Toxin | 1.49             | 1.15      | -2.04     | 2.64             | 0.6         | 110.4        |
| 80    | N Protein | A*01:01 | 11             | NSSPDDQIGYY | 0.01726        | 100.00% (40/40) | Non-Toxin | 1.24             | 1.31      | -2.01     | 2.54             | 0.53        | 102.4        |
| 81    | N Protein | A*68:02 | 9              | NTASWFTAL   | 0.22775        | 100.00% (40/40) | Non-Toxin | 1.42             | 0.49      | -0.79     | 1.91             | 1.12        | 6.2          |
| 82    | N Protein | A*68:02 | 9              | NTASWFTAL   | 0.22775        | 100.00% (40/40) | Non-Toxin | 1.42             | 0.49      | -0.79     | 1.91             | 1.12        | 6.2          |
| 83    | N Protein | A*23:01 | 10             | QFAPSASAFF  | -0.17577       | 100.00% (40/40) | Non-Toxin | 1.3              | 1.25      | -1.97     | 2.55             | 0.58        | 92.6         |
| 84    | N Protein | B*15:01 | 10             | RQKRTATKAY  | -0.06462       | 100.00% (40/40) | Non-Toxin | 1.51             | 1.34      | -1.55     | 2.85             | 1.3         | 35.5         |
| 85    | N Protein | B*15:01 | 10             | RQKRTATKAY  | -0.06462       | 100.00% (40/40) | Non-Toxin | 1.51             | 1.34      | -1.55     | 2.85             | 1.3         | 35.5         |
| 86    | N Protein | A*30:02 | 10             | RQKRTATKAY  | -0.06462       | 100.00% (40/40) | Non-Toxin | 1.51             | 1.34      | -2.03     | 2.85             | 0.82        | 107.5        |
| 87    | N Protein | B*35:01 | 9              | SPDDQIGYY   | 0.06844        | 100.00% (40/40) | Non-Toxin | 1.24             | 1.11      | -1.8      | 2.35             | 0.55        | 63.2         |
| 88    | N Protein | B*07:02 | 9              | SPRWYFYLL   | 0.34101        | 100.00% (40/40) | Non-Toxin | 1.61             | 0.35      | -1.2      | 1.96             | 0.76        | 15.7         |
| 89    | N Protein | B*08:01 | 9              | SPRWYFYLL   | 0.34101        | 100.00% (40/40) | Non-Toxin | 1.61             | 0.35      | -1.41     | 1.96             | 0.55        | 25.5         |
| 90    | N Protein | A*01:01 | 10             | SSPDDQIGYY  | 0.07924        | 100.00% (40/40) | Non-Toxin | 1.24             | 1.36      | -1.16     | 2.6              | 1.45        | 14.3         |
| 91    | N Protein | A*01:01 | 10             | SSPDDQIGYY  | 0.07924        | 100.00% (40/40) | Non-Toxin | 1.24             | 1.36      | -1.16     | 2.6              | 1.45        | 14.3         |
| 92    | N Protein | B*35:01 | 9              | TPSGTWLTY   | 0.24003        | 100.00% (40/40) | Non-Toxin | 1.52             | 1.15      | -0.84     | 2.67             | 1.83        | 6.9          |



| 93    | N Protein | B*35:01 | 9              | TPSGTWLTY   | 0.24003        | 100.00% (40/40) | Non-Toxin | 1.52             | 1.15      | -0.84     | 2.67             | 1.83        | 6.9          |       |
|-------|-----------|---------|----------------|-------------|----------------|-----------------|-----------|------------------|-----------|-----------|------------------|-------------|--------------|-------|
| 94    | N Protein | B*53:01 | 9              | TPSGTWLTY   | 0.24003        | 100.00% (40/40) | Non-Toxin | 1.52             | 1.15      | -2.07     | 2.67             | 0.6         | 117.2        |       |
| 95    | N Protein | B*35:01 | 10             | VTPSGTWLTY  | 0.12256        | 100.00% (40/40) | Non-Toxin | 1.52             | 1.21      | -1.93     | 2.73             | 0.8         | 84.5         |       |
| 96    | N Protein | A*30:02 | 10             | VTPSGTWLTY  | 0.12256        | 100.00% (40/40) | Non-Toxin | 1.52             | 1.21      | -2.06     | 2.73             | 0.67        | 115.4        |       |
| S.No. | ORF       | Allele  | Peptide Length | Peptide     | Immunogenicity | Conservancy     | Toxicity  | Proteasome Score | TAP Score | MHC Score | Processing Score | Total Score | MHC IC50[nM] |       |
| 97    | ORF10     | A*02:06 | 10             | AQDVVNFNL   | 0.20505        | 100.00% (28/28) | Non-Toxin | 1.4              | 0.55      | -1.35     | 1.95             | 0.6         | 22.6         |       |
| 98    | ORF10     | B*35:01 | 8              | FAFPFTIY    | 0.2897         | 100.00% (28/28) | Non-Toxin | 1.47             | 1.32      | -1.93     | 2.79             | 0.86        | 85.1         |       |
| 99    | ORF10     | A*68:02 | 10             | FAFPFTIYSL  | 0.20414        | 100.00% (28/28) | Non-Toxin | 1.38             | 0.47      | -1.39     | 1.85             | 0.46        | 24.5         |       |
| 100   | ORF10     | A*68:01 | 10             | FTIYSLLLCR  | -0.18372       | 100.00% (28/28) | Non-Toxin | 1.19             | 0.56      | -1.06     | 1.75             | 0.69        | 11.4         |       |
| 101   | ORF10     | A*23:01 | 8              | GYINVFAPF   | 0.22011        | 100.00% (28/28) | Non-Toxin | 1.16             | 1.18      | -1.84     | 2.35             | 0.51        | 68.7         |       |
| 102   | ORF10     | A*23:01 | 10             | GYINVFAPFP  | 0.32004        | 100.00% (28/28) | Non-Toxin | 1.05             | 1.18      | -0.82     | 2.23             | 1.41        | 6.6          |       |
| 103   | ORF10     | A*24:02 | 10             | GYINVFAPFP  | 0.32004        | 100.00% (28/28) | Non-Toxin | 1.05             | 1.18      | -1.17     | 2.23             | 1.06        | 14.9         |       |
| 104   | ORF10     | A*23:01 | 10             | GYINVFAPFP  | 0.32004        | 100.00% (28/28) | Non-Toxin | 1.05             | 1.18      | -0.82     | 2.23             | 1.41        | 6.6          |       |
| 105   | ORF10     | A*24:02 | 10             | GYINVFAPFP  | 0.32004        | 100.00% (28/28) | Non-Toxin | 1.05             | 1.18      | -1.17     | 2.23             | 1.06        | 14.9         |       |
| 106   | ORF10     | B*15:01 | 10             | LLCRMNSRNY  | -0.25855       | 100.00% (28/28) | Non-Toxin | 1.23             | 1.31      | -1.93     | 2.53             | 0.6         | 84.8         |       |
| 107   | ORF10     | B*35:01 | 9              | MGYINVFAPF  | 0.28694        | 100.00% (28/28) | Non-Toxin | 1.16             | 1.14      | -1.56     | 2.3              | 0.74        | 36.6         |       |
| 108   | ORF10     | A*68:02 | 9              | NVFAPFTI    | 0.30241        | 100.00% (28/28) | Non-Toxin | 1.25             | 0.36      | -0.71     | 1.61             | 0.9         | 5.1          |       |
| 109   | ORF10     | A*32:01 | 9              | NVFAPFTI    | 0.30241        | 100.00% (28/28) | Non-Toxin | 1.25             | 0.36      | -1        | 1.61             | 0.61        | 10.1         |       |
| 110   | ORF10     | A*02:06 | 9              | NVFAPFTI    | 0.30241        | 100.00% (28/28) | Non-Toxin | 1.25             | 0.36      | -1        | 1.61             | 0.61        | 10.1         |       |
| 111   | ORF10     | A*02:01 | 9              | NVFAPFTI    | 0.30241        | 100.00% (28/28) | Non-Toxin | 1.25             | 0.36      | -1.11     | 1.61             | 0.5         | 13           |       |
| 112   | ORF10     | A*68:01 | 10             | NVFAPFTIY   | 0.40129        | 100.00% (28/28) | Non-Toxin | 1.47             | 1.4       | -1.84     | 2.86             | 1.02        | 69.7         |       |
| 113   | ORF10     | A*68:01 | 10             | NVFAPFTIY   | 0.40129        | 100.00% (28/28) | Non-Toxin | 1.47             | 1.4       | -1.84     | 2.86             | 1.02        | 69.7         |       |
| 114   | ORF10     | A*11:01 | 10             | NVFAPFTIY   | 0.40129        | 100.00% (28/28) | Non-Toxin | 1.47             | 1.4       | -2.2      | 2.86             | 0.67        | 157.8        |       |
| 115   | ORF10     | A*30:02 | 10             | NVFAPFTIY   | 0.40129        | 100.00% (28/28) | Non-Toxin | 1.47             | 1.4       | -2.29     | 2.86             | 0.57        | 196.8        |       |
| 116   | ORF10     | B*15:01 | 10             | NVFAPFTIY   | 0.40129        | 100.00% (28/28) | Non-Toxin | 1.47             | 1.4       | -2.3      | 2.86             | 0.56        | 200.7        |       |
| 117   | ORF10     | A*68:01 | 9              | TIYSLLLCR   | -0.22977       | 100.00% (28/28) | Non-Toxin | 1.19             | 0.73      | -1.18     | 1.91             | 0.74        | 15.1         |       |
| 118   | ORF10     | A*30:02 | 9              | VFAPFTIY    | 0.34042        | 100.00% (28/28) | Non-Toxin | 1.47             | 1.44      | -2.21     | 2.9              | 0.69        | 161.8        |       |
| 119   | ORF10     | B*15:01 | 10             | YIAQVDVVNF  | 0.02786        | 100.00% (28/28) | Non-Toxin | 1.52             | 1.22      | -1.76     | 2.74             | 0.98        | 57.9         |       |
| 120   | ORF10     | B*35:01 | 9              | YINVFAPFP   | 0.28259        | 100.00% (28/28) | Non-Toxin | 1.05             | 1.09      | -1.37     | 2.14             | 0.77        | 23.6         |       |
| S.No. | ORF       | Allele  | Peptide Length | Peptide     | Immunogenicity | Conservancy     | Toxicity  | Proteasome Score | TAP Score | MHC Score | Processing Score | Total Score | MHC IC50[nM] | NSP   |
| 121   | ORF1ab    | A*01:01 | 10             | ACTDDNALAY  | 0.10055        | 100.00% (36/36) | Non-Toxin | 1.49             | 1.33      | -0.82     | 2.82             | 2           | 6.6          | nsp9  |
| 122   | ORF1ab    | A*01:01 | 11             | ACTDDNALAYY | 0.10874        | 100.00% (36/36) | Non-Toxin | 1.35             | 1.33      | -1.12     | 2.68             | 1.56        | 13.1         | nsp9  |
| 123   | ORF1ab    | B*15:01 | 10             | ARLYYDSMSY  | -0.38991       | 97.22% (35/36)  | Non-Toxin | 1.45             | 1.47      | -1.39     | 2.92             | 1.53        | 24.5         | nsp12 |
| 124   | ORF1ab    | B*15:01 | 10             | AVMYMGTLISY | -0.2682        | 100.00% (36/36) | Non-Toxin | 1.3              | 1.35      | -0.95     | 2.64             | 1.7         | 8.9          | nsp3  |
| 125   | ORF1ab    | A*23:01 | 9              | AYILFTRFF   | 0.29466        | 100.00% (36/36) | Non-Toxin | 1.5              | 1.33      | -1.28     | 2.83             | 1.55        | 19           | nsp3  |
| 126   | ORF1ab    | A*23:01 | 10             | AYYNTFSSTF  | -0.11398       | 100.00% (36/36) | Non-Toxin | 1.4              | 1.25      | -1.13     | 2.65             | 1.52        | 13.5         | nsp3  |
| 127   | ORF1ab    | A*01:01 | 9              | CTDDNALAY   | 0.07355        | 100.00% (36/36) | Non-Toxin | 1.49             | 1.23      | -0.45     | 2.72             | 2.27        | 2.8          | nsp9  |
| 128   | ORF1ab    | A*01:01 | 10             | CTDDNALAYY  | 0.08174        | 100.00% (36/36) | Non-Toxin | 1.35             | 1.23      | -0.57     | 2.58             | 2.01        | 3.7          | nsp9  |
| 129   | ORF1ab    | A*01:01 | 9              | DTDFVNEFY   | 0.31201        | 97.22% (35/36)  | Non-Toxin | 1.55             | 1.07      | -0.91     | 2.62             | 1.71        | 8.1          | nsp12 |
| 130   | ORF1ab    | A*26:01 | 9              | ETISLAGSY   | -0.1653        | 100.00% (36/36) | Non-Toxin | 1.4              | 1.21      | -0.53     | 2.61             | 2.08        | 3.4          | nsp3  |
| 131   | ORF1ab    | B*35:01 | 9              | FAIGLALYY   | 0.09181        | 97.22% (35/36)  | Non-Toxin | 1.2              | 1.27      | -0.71     | 2.47             | 1.77        | 5.1          | nsp13 |
| 132   | ORF1ab    | B*35:01 | 9              | FAVDAAKAY   | -0.04849       | 100.00% (36/36) | Non-Toxin | 1.73             | 1.35      | -0.46     | 3.08             | 2.62        | 2.9          | nsp10 |
| 133   | ORF1ab    | A*02:03 | 9              | FLNRFTTTL   | 0.25596        | 100.00% (36/36) | Non-Toxin | 1.81             | 0.32      | -0.46     | 2.12             | 1.66        | 2.9          | nsp5  |
| 134   | ORF1ab    | B*35:01 | 10             | FPLCANGQVF  | -0.06779       | 97.22% (35/36)  | Non-Toxin | 1.55             | 0.96      | -1        | 2.51             | 1.51        | 10           | nsp13 |
| 135   | ORF1ab    | B*35:01 | 9              | FVSLAIDAY   | 0.1401         | 97.22% (35/36)  | Non-Toxin | 1.26             | 1.24      | -0.96     | 2.5              | 1.53        | 9.2          | nsp12 |
| 136   | ORF1ab    | A*01:01 | 9              | GTDLEGNFY   | 0.18838        | 100.00% (36/36) | Non-Toxin | 1.42             | 1.17      | -0.99     | 2.59             | 1.61        | 9.7          | nsp5  |
| 137   | ORF1ab    | B*15:01 | 9              | ILMTARTVY   | 0.12576        | 100.00% (36/36) | Non-Toxin | 1.65             | 1.34      | -1.1      | 2.99             | 1.89        | 12.5         | nsp6  |
| 138   | ORF1ab    | B*35:01 | 10             | IPMDSTVKNY  | -0.3049        | 97.22% (35/36)  | Non-Toxin | 1.53             | 1.16      | -1.18     | 2.7              | 1.52        | 15.1         | nsp15 |
| 139   | ORF1ab    | A*01:01 | 9              | ISDYDYRY    | 0.04872        | 97.22% (35/36)  | Non-Toxin | 1.49             | 1.29      | -1.06     | 2.77             | 1.71        | 11.5         | nsp12 |
| 140   | ORF1ab    | B*58:01 | 9              | KAYKIEELF   | 0.08367        | 97.22% (35/36)  | Non-Toxin | 1.24             | 1.19      | -0.9      | 2.43             | 1.53        | 7.9          | nsp14 |
| 141   | ORF1ab    | A*32:01 | 9              | KLFDRYFKY   | 0.08004        | 97.22% (35/36)  | Non-Toxin | 1.51             | 1.39      | -1.17     | 2.9              | 1.74        | 14.7         | nsp12 |

|     |        |         |    |             |          |                 |           |      |      |       |      |      |      |       |
|-----|--------|---------|----|-------------|----------|-----------------|-----------|------|------|-------|------|------|------|-------|
| 142 | ORF1ab | A*30:02 | 9  | KLFDRYFKY   | 0.08004  | 97.22% (35/36)  | Non-Toxin | 1.51 | 1.39 | -1.27 | 2.9  | 1.64 | 18.5 | nsp12 |
| 143 | ORF1ab | A*03:01 | 9  | KLFDRYFKY   | 0.08004  | 97.22% (35/36)  | Non-Toxin | 1.51 | 1.39 | -1.31 | 2.9  | 1.6  | 20.2 | nsp12 |
| 144 | ORF1ab | B*15:01 | 10 | LILMTARTVY  | 0.0012   | 100.00% (36/36) | Non-Toxin | 1.65 | 1.36 | -1.23 | 3.01 | 1.78 | 16.9 | nsp6  |
| 145 | ORF1ab | B*15:01 | 9  | LMNVLTLYV   | 0.07994  | 100.00% (36/36) | Non-Toxin | 1.51 | 1.26 | -1.16 | 2.77 | 1.61 | 14.5 | nsp6  |
| 146 | ORF1ab | B*15:01 | 10 | LMSNLGMPSY  | -0.30933 | 100.00% (36/36) | Non-Toxin | 1.55 | 1.34 | -1    | 2.9  | 1.89 | 10.1 | nsp3  |
| 147 | ORF1ab | B*35:01 | 9  | LPGVYSVIY   | 0.00581  | 100.00% (36/36) | Non-Toxin | 1.39 | 1.02 | -0.81 | 2.42 | 1.6  | 6.5  | nsp4  |
| 148 | ORF1ab | B*35:01 | 9  | LPSLATVAY   | 0.06748  | 100.00% (36/36) | Non-Toxin | 1.47 | 1.15 | -0.34 | 2.62 | 2.28 | 2.2  | nsp6  |
| 149 | ORF1ab | B*35:01 | 9  | LVAEWFLLAY  | 0.45285  | 100.00% (36/36) | Non-Toxin | 1.21 | 1.33 | -1.01 | 2.54 | 1.52 | 10.3 | nsp3  |
| 150 | ORF1ab | B*35:01 | 10 | LVPFWITIAY  | 0.63122  | 100.00% (36/36) | Non-Toxin | 1.42 | 1.26 | -0.91 | 2.68 | 1.77 | 8.1  | nsp4  |
| 151 | ORF1ab | B*15:01 | 9  | MMSAPPAQY   | -0.07023 | 100.00% (36/36) | Non-Toxin | 1.27 | 1.36 | -1.11 | 2.63 | 1.52 | 12.9 | nsp3  |
| 152 | ORF1ab | B*35:01 | 9  | MSNLGMPSY   | -0.25158 | 100.00% (36/36) | Non-Toxin | 1.55 | 1.29 | -1.28 | 2.84 | 1.56 | 18.9 | nsp3  |
| 153 | ORF1ab | B*15:01 | 10 | MVMFTPLVPF  | 0.10572  | 100.00% (36/36) | Non-Toxin | 1.2  | 1.18 | -0.74 | 2.38 | 1.64 | 5.5  | nsp4  |
| 154 | ORF1ab | A*23:01 | 11 | MYMGTLSYEQF | -0.14366 | 100.00% (36/36) | Non-Toxin | 1.36 | 1.28 | -0.96 | 2.65 | 1.68 | 9.2  | nsp3  |
| 155 | ORF1ab | B*44:03 | 10 | QEYADVFLHY  | 0.23099  | 97.22% (35/36)  | Non-Toxin | 1.22 | 1.36 | -1.01 | 2.57 | 1.57 | 10.2 | nsp12 |
| 156 | ORF1ab | B*35:01 | 9  | QVVDMSMTY   | -0.41653 | 100.00% (36/36) | Non-Toxin | 1.49 | 1.37 | -1.03 | 2.87 | 1.84 | 10.6 | nsp3  |
| 157 | ORF1ab | B*15:01 | 9  | RLYYDSMSY   | -0.38391 | 97.22% (35/36)  | Non-Toxin | 1.45 | 1.53 | -1    | 2.98 | 1.97 | 10.1 | nsp12 |
| 158 | ORF1ab | A*03:01 | 9  | RLYYDSMSY   | -0.38391 | 97.22% (35/36)  | Non-Toxin | 1.45 | 1.53 | -1.02 | 2.98 | 1.96 | 10.4 | nsp12 |
| 159 | ORF1ab | A*30:02 | 9  | RLYYDSMSY   | -0.38391 | 97.22% (35/36)  | Non-Toxin | 1.45 | 1.53 | -1.14 | 2.98 | 1.84 | 13.9 | nsp12 |
| 160 | ORF1ab | A*32:01 | 9  | RLYYDSMSY   | -0.38391 | 97.22% (35/36)  | Non-Toxin | 1.45 | 1.53 | -1.16 | 2.98 | 1.82 | 14.4 | nsp12 |
| 161 | ORF1ab | A*32:01 | 9  | RMYIFFASF   | 0.29328  | 100.00% (36/36) | Non-Toxin | 1.32 | 1.36 | -0.82 | 2.68 | 1.86 | 6.6  | nsp3  |
| 162 | ORF1ab | A*30:02 | 10 | RMYIFFASFY  | 0.32633  | 100.00% (36/36) | Non-Toxin | 1.28 | 1.53 | -0.97 | 2.81 | 1.83 | 9.4  | nsp3  |
| 163 | ORF1ab | A*03:01 | 10 | RMYIFFASFY  | 0.32633  | 100.00% (36/36) | Non-Toxin | 1.28 | 1.53 | -1    | 2.81 | 1.8  | 10.1 | nsp3  |
| 164 | ORF1ab | B*15:01 | 10 | RTIAFGGCVF  | 0.24009  | 100.00% (36/36) | Non-Toxin | 1.51 | 1.21 | -1.17 | 2.73 | 1.56 | 14.7 | nsp2  |
| 165 | ORF1ab | A*30:02 | 10 | RYFKYWDQTY  | -0.0211  | 97.22% (35/36)  | Non-Toxin | 1.49 | 1.48 | -1.42 | 2.97 | 1.54 | 26.6 | nsp12 |
| 166 | ORF1ab | A*30:02 | 10 | RYFRLTLGVY  | 0.15936  | 100.00% (36/36) | Non-Toxin | 1.41 | 1.6  | -1.34 | 3.01 | 1.66 | 22.1 | nsp6  |
| 167 | ORF1ab | B*44:03 | 9  | SEFSSLPSY   | -0.40603 | 100.00% (36/36) | Non-Toxin | 1.49 | 1.35 | -1.03 | 2.84 | 1.82 | 10.6 | nsp8  |
| 168 | ORF1ab | A*23:01 | 10 | SYFVVKRHTF  | 0.00844  | 97.22% (35/36)  | Non-Toxin | 1.5  | 1.23 | -1.02 | 2.73 | 1.71 | 10.4 | nsp12 |
| 169 | ORF1ab | A*01:01 | 11 | TACTDDNALAY | 0.10879  | 100.00% (36/36) | Non-Toxin | 1.49 | 1.27 | -1.19 | 2.75 | 1.56 | 15.6 | nsp9  |
| 170 | ORF1ab | A*02:01 | 9  | TMADLVYAL   | 0.08282  | 97.22% (35/36)  | Non-Toxin | 1.73 | 0.44 | -0.56 | 2.17 | 1.62 | 3.6  | nsp12 |
| 171 | ORF1ab | A*02:03 | 9  | TMADLVYAL   | 0.08282  | 97.22% (35/36)  | Non-Toxin | 1.73 | 0.44 | -0.64 | 2.17 | 1.53 | 4.4  | nsp12 |
| 172 | ORF1ab | A*02:06 | 9  | TMADLVYAL   | 0.08282  | 97.22% (35/36)  | Non-Toxin | 1.73 | 0.44 | -0.67 | 2.17 | 1.5  | 4.7  | nsp12 |
| 173 | ORF1ab | B*15:01 | 10 | TQVVDMSMTY  | -0.37571 | 100.00% (36/36) | Non-Toxin | 1.49 | 1.32 | -1.25 | 2.81 | 1.56 | 17.6 | nsp3  |
| 174 | ORF1ab | A*01:01 | 10 | TTDPSFLGRY  | -0.00266 | 100.00% (36/36) | Non-Toxin | 1.29 | 1.16 | -0.83 | 2.46 | 1.63 | 6.7  | nsp3  |
| 175 | ORF1ab | B*35:01 | 9  | TVAYFNMVY   | -0.00719 | 100.00% (36/36) | Non-Toxin | 1.52 | 1.39 | -1.23 | 2.92 | 1.69 | 16.9 | nsp6  |
| 176 | ORF1ab | A*01:01 | 10 | VDTDFVNEFY  | 0.33593  | 97.22% (35/36)  | Non-Toxin | 1.55 | 1.09 | -0.9  | 2.64 | 1.74 | 7.9  | nsp12 |
| 177 | ORF1ab | B*15:01 | 10 | VMFLARGIVF  | 0.28368  | 100.00% (36/36) | Non-Toxin | 1.57 | 1.23 | -1.09 | 2.8  | 1.71 | 12.4 | nsp6  |
| 178 | ORF1ab | B*15:01 | 9  | VMFTPLVPF   | 0.08418  | 100.00% (36/36) | Non-Toxin | 1.2  | 1.24 | -0.92 | 2.44 | 1.52 | 8.4  | nsp4  |
| 179 | ORF1ab | B*15:01 | 9  | VMYMGTLSY   | -0.21438 | 100.00% (36/36) | Non-Toxin | 1.3  | 1.5  | -0.8  | 2.79 | 1.99 | 6.3  | nsp3  |
| 180 | ORF1ab | A*03:01 | 9  | VMYMGTLSY   | -0.21438 | 100.00% (36/36) | Non-Toxin | 1.3  | 1.5  | -0.98 | 2.79 | 1.82 | 9.5  | nsp3  |
| 181 | ORF1ab | A*30:02 | 9  | VMYMGTLSY   | -0.21438 | 100.00% (36/36) | Non-Toxin | 1.3  | 1.5  | -1.09 | 2.79 | 1.7  | 12.4 | nsp3  |
| 182 | ORF1ab | B*35:01 | 9  | VPFWITIAY   | 0.56221  | 100.00% (36/36) | Non-Toxin | 1.42 | 1.23 | -0.51 | 2.65 | 2.14 | 3.2  | nsp4  |
| 183 | ORF1ab | B*35:01 | 9  | VPWDTIANY   | 0.28654  | 100.00% (36/36) | Non-Toxin | 1.37 | 1.26 | -1.06 | 2.63 | 1.57 | 11.4 | nsp3  |
| 184 | ORF1ab | B*15:01 | 9  | VVYRGITTY   | 0.17586  | 97.22% (35/36)  | Non-Toxin | 1.54 | 1.51 | -1.41 | 3.05 | 1.64 | 25.5 | nsp13 |
| 185 | ORF1ab | A*30:02 | 9  | VVYRGITTY   | 0.17586  | 97.22% (35/36)  | Non-Toxin | 1.54 | 1.51 | -1.43 | 3.05 | 1.62 | 27   | nsp13 |
| 186 | ORF1ab | A*23:01 | 9  | WSMATYYLF   | 0.00709  | 97.22% (35/36)  | Non-Toxin | 1.17 | 1.06 | -0.73 | 2.23 | 1.5  | 5.4  | nsp3  |
| 187 | ORF1ab | B*35:01 | 8  | YAFEHIVY    | 0.33037  | 97.22% (35/36)  | Non-Toxin | 1.68 | 1.32 | -1.49 | 3    | 1.51 | 30.9 | nsp15 |
| 188 | ORF1ab | B*08:01 | 8  | YLKRRVVF    | 0.10618  | 100.00% (36/36) | Non-Toxin | 1.62 | 1.16 | -1.2  | 2.78 | 1.58 | 15.7 | nsp4  |
| 189 | ORF1ab | B*35:01 | 9  | YPNASFDNF   | 0.00131  | 100.00% (36/36) | Non-Toxin | 1.27 | 0.86 | -0.56 | 2.12 | 1.56 | 3.6  | nsp3  |
| 190 | ORF1ab | A*02:01 | 10 | YTADLVYAL   | 0.05177  | 97.22% (35/36)  | Non-Toxin | 1.73 | 0.47 | -0.58 | 2.2  | 1.62 | 3.8  | nsp12 |
| 191 | ORF1ab | A*02:06 | 10 | YTADLVYAL   | 0.05177  | 97.22% (35/36)  | Non-Toxin | 1.73 | 0.47 | -0.63 | 2.2  | 1.57 | 4.3  | nsp12 |
| 192 | ORF1ab | A*02:03 | 10 | YTADLVYAL   | 0.05177  | 97.22% (35/36)  | Non-Toxin | 1.73 | 0.47 | -0.67 | 2.2  | 1.53 | 4.7  | nsp12 |

| 193   | ORF1ab | B*35:01 | 9              | YVMHANYIF   | 0.0822         | 97.22% (35/36)  | Non-Toxin | 1.37             | 1.17      | -1.03     | 2.53             | 1.5         | 10.8         | nsp16 |
|-------|--------|---------|----------------|-------------|----------------|-----------------|-----------|------------------|-----------|-----------|------------------|-------------|--------------|-------|
| 194   | ORF1ab | B*35:01 | 9              | YVNTFSSTF   | -0.12171       | 100.00% (36/36) | Non-Toxin | 1.4              | 1.18      | -1.01     | 2.58             | 1.57        | 10.2         | nsp3  |
| 195   | ORF1ab | B*15:01 | 9              | YVNTFSSTF   | -0.12171       | 100.00% (36/36) | Non-Toxin | 1.4              | 1.18      | -1.07     | 2.58             | 1.5         | 11.8         | nsp3  |
| 196   | ORF1ab | A*23:01 | 10             | YYFMRFRRAF  | 0.14096        | 100.00% (36/36) | Non-Toxin | 1.34             | 1.32      | -0.95     | 2.66             | 1.7         | 9            | nsp4  |
| S.No. | ORF    | Allele  | Peptide Length | Peptide     | Immunogenicity | Conservancy     | Toxicity  | Proteasome Score | TAP Score | MHC Score | Processing Score | Total Score | MHC IC50[nM] |       |
| 197   | ORF3a  | B*44:03 | 11             | AGLEAPFLYLY | 0.21841        | 100.00% (28/28) | Non-Toxin | 1.51             | 1.29      | -1.63     | 2.8              | 1.17        | 42.9         |       |
| 198   | ORF3a  | B*44:03 | 11             | AGLEAPFLYLY | 0.21841        | 100.00% (28/28) | Non-Toxin | 1.51             | 1.29      | -1.63     | 2.8              | 1.17        | 42.9         |       |
| 199   | ORF3a  | B*44:02 | 11             | AGLEAPFLYLY | 0.21841        | 100.00% (28/28) | Non-Toxin | 1.51             | 1.29      | -1.94     | 2.8              | 0.86        | 86.3         |       |
| 200   | ORF3a  | A*02:03 | 9              | ALSKGVHFV   | -0.10314       | 100.00% (28/28) | Non-Toxin | 1.07             | 0.23      | -0.57     | 1.3              | 0.73        | 3.7          |       |
| 201   | ORF3a  | A*02:03 | 9              | ALVYFLQSI   | -0.08118       | 100.00% (28/28) | Non-Toxin | 1.25             | 0.31      | -0.83     | 1.56             | 0.73        | 6.8          |       |
| 202   | ORF3a  | A*26:01 | 10             | DTGVEHVTF   | 0.32156        | 100.00% (28/28) | Non-Toxin | 1.24             | 0.89      | -1.64     | 2.13             | 0.49        | 43.5         |       |
| 203   | ORF3a  | B*15:01 | 9              | FLYLYALVY   | 0.03563        | 100.00% (28/28) | Non-Toxin | 1.58             | 1.26      | -2.26     | 2.83             | 0.58        | 181.1        |       |
| 204   | ORF3a  | A*23:01 | 10             | FLYLYALVYF  | 0.04438        | 100.00% (28/28) | Non-Toxin | 1.18             | 1.09      | -1.79     | 2.27             | 0.48        | 61.1         |       |
| 205   | ORF3a  | B*44:03 | 10             | GLEAPFLYLY  | 0.15503        | 100.00% (28/28) | Non-Toxin | 1.51             | 1.2       | -1.26     | 2.71             | 1.46        | 18.1         |       |
| 206   | ORF3a  | B*44:02 | 10             | GLEAPFLYLY  | 0.15503        | 100.00% (28/28) | Non-Toxin | 1.51             | 1.2       | -1.61     | 2.71             | 1.1         | 40.7         |       |
| 207   | ORF3a  | B*44:03 | 10             | GLEAPFLYLY  | 0.15503        | 100.00% (28/28) | Non-Toxin | 1.51             | 1.2       | -1.26     | 2.71             | 1.46        | 18.1         |       |
| 208   | ORF3a  | B*44:02 | 10             | GLEAPFLYLY  | 0.15503        | 100.00% (28/28) | Non-Toxin | 1.51             | 1.2       | -1.61     | 2.71             | 1.1         | 40.7         |       |
| 209   | ORF3a  | A*23:01 | 10             | HFVCLLLLF   | -0.08423       | 100.00% (28/28) | Non-Toxin | 1.34             | 1.19      | -1.75     | 2.52             | 0.77        | 56.3         |       |
| 210   | ORF3a  | B*35:01 | 9              | IPIQASLPF   | -0.20683       | 100.00% (28/28) | Non-Toxin | 0.98             | 1.01      | -0.43     | 1.99             | 1.56        | 2.7          |       |
| 211   | ORF3a  | B*35:01 | 9              | IPIQASLPF   | -0.20683       | 100.00% (28/28) | Non-Toxin | 0.98             | 1.01      | -0.43     | 1.99             | 1.56        | 2.7          |       |
| 212   | ORF3a  | B*53:01 | 9              | IPIQASLPF   | -0.20683       | 100.00% (28/28) | Non-Toxin | 0.98             | 1.01      | -1.28     | 1.99             | 0.71        | 19.2         |       |
| 213   | ORF3a  | B*07:02 | 9              | IPIQASLPF   | -0.20683       | 100.00% (28/28) | Non-Toxin | 0.98             | 1.01      | -1.39     | 1.99             | 0.6         | 24.7         |       |
| 214   | ORF3a  | B*15:01 | 10             | IVGVALLAVF  | 0.12654        | 100.00% (28/28) | Non-Toxin | 1.3              | 1.12      | -1.76     | 2.42             | 0.66        | 57.1         |       |
| 215   | ORF3a  | B*44:03 | 9              | LEAPFLYLY   | 0.0955         | 100.00% (28/28) | Non-Toxin | 1.51             | 1.21      | -1.3      | 2.72             | 1.41        | 20.1         |       |
| 216   | ORF3a  | B*44:03 | 9              | LEAPFLYLY   | 0.0955         | 100.00% (28/28) | Non-Toxin | 1.51             | 1.21      | -1.3      | 2.72             | 1.41        | 20.1         |       |
| 217   | ORF3a  | B*44:02 | 9              | LEAPFLYLY   | 0.0955         | 100.00% (28/28) | Non-Toxin | 1.51             | 1.21      | -1.73     | 2.72             | 0.99        | 53.3         |       |
| 218   | ORF3a  | B*15:01 | 11             | LLVAAGLEAPF | 0.23386        | 100.00% (28/28) | Non-Toxin | 0.86             | 1.16      | -1.49     | 2.02             | 0.54        | 30.8         |       |
| 219   | ORF3a  | B*15:01 | 10             | LVAAGLEAPF  | 0.19506        | 100.00% (28/28) | Non-Toxin | 0.86             | 1.19      | -1.1      | 2.05             | 0.95        | 12.5         |       |
| 220   | ORF3a  | A*23:01 | 10             | LVYFLQSINF  | -0.05419       | 100.00% (28/28) | Non-Toxin | 1.3              | 1.31      | -1.39     | 2.61             | 1.23        | 24.3         |       |
| 221   | ORF3a  | A*23:01 | 10             | LVYFLQSINF  | -0.05419       | 100.00% (28/28) | Non-Toxin | 1.3              | 1.31      | -1.39     | 2.61             | 1.23        | 24.3         |       |
| 222   | ORF3a  | A*24:02 | 10             | LVYFLQSINF  | -0.05419       | 100.00% (28/28) | Non-Toxin | 1.3              | 1.31      | -1.84     | 2.61             | 0.77        | 69           |       |
| 223   | ORF3a  | B*15:01 | 10             | LVYFLQSINF  | -0.05419       | 100.00% (28/28) | Non-Toxin | 1.3              | 1.31      | -1.93     | 2.61             | 0.68        | 85.6         |       |
| 224   | ORF3a  | A*23:01 | 9              | LYLYALVYF   | 0.05302        | 100.00% (28/28) | Non-Toxin | 1.18             | 1.18      | -1.29     | 2.36             | 1.07        | 19.6         |       |
| 225   | ORF3a  | A*23:01 | 9              | LYLYALVYF   | 0.05302        | 100.00% (28/28) | Non-Toxin | 1.18             | 1.18      | -1.29     | 2.36             | 1.07        | 19.6         |       |
| 226   | ORF3a  | A*24:02 | 9              | LYLYALVYF   | 0.05302        | 100.00% (28/28) | Non-Toxin | 1.18             | 1.18      | -1.86     | 2.36             | 0.5         | 71.7         |       |
| 227   | ORF3a  | A*02:01 | 10             | LYLYALVYFL  | 0.12412        | 100.00% (28/28) | Non-Toxin | 1.45             | 0.5       | -1        | 1.94             | 0.94        | 10.1         |       |
| 228   | ORF3a  | A*32:01 | 10             | RIFTIGTVTL  | 0.33372        | 100.00% (28/28) | Non-Toxin | 1.77             | 0.64      | -1.59     | 2.41             | 0.82        | 38.6         |       |
| 229   | ORF3a  | A*31:01 | 9              | RLWLCWKCR   | 0.00325        | 100.00% (28/28) | Non-Toxin | 1.27             | 0.85      | -1.25     | 2.11             | 0.87        | 17.7         |       |
| 230   | ORF3a  | B*15:01 | 10             | TIPIQASLPF  | -0.11595       | 100.00% (28/28) | Non-Toxin | 0.98             | 1.21      | -1.31     | 2.18             | 0.87        | 20.6         |       |
| 231   | ORF3a  | B*35:01 | 10             | TIPIQASLPF  | -0.11595       | 100.00% (28/28) | Non-Toxin | 0.98             | 1.21      | -1.39     | 2.18             | 0.79        | 24.8         |       |
| 232   | ORF3a  | A*02:03 | 9              | TVYSHLLLV   | -0.16245       | 100.00% (28/28) | Non-Toxin | 1.17             | 0.29      | -0.79     | 1.45             | 0.66        | 6.2          |       |
| 233   | ORF3a  | A*02:06 | 9              | TVYSHLLLV   | -0.16245       | 100.00% (28/28) | Non-Toxin | 1.17             | 0.29      | -0.91     | 1.45             | 0.54        | 8.2          |       |
| 234   | ORF3a  | B*35:01 | 9              | VAAGLEAPF   | 0.15679        | 100.00% (28/28) | Non-Toxin | 0.86             | 1.18      | -1.2      | 2.04             | 0.84        | 15.8         |       |
| 235   | ORF3a  | B*44:03 | 9              | VEHVTFYIY   | 0.3766         | 100.00% (28/28) | Non-Toxin | 1.28             | 1.24      | -1.9      | 2.52             | 0.62        | 78.7         |       |
| 236   | ORF3a  | A*30:02 | 10             | VVNPVMEPIY  | 0.01859        | 100.00% (28/28) | Non-Toxin | 1.25             | 1.3       | -1.92     | 2.55             | 0.63        | 82.7         |       |
| 237   | ORF3a  | A*23:01 | 9              | VYFLQSINF   | -0.13315       | 100.00% (28/28) | Non-Toxin | 1.3              | 1.31      | -0.96     | 2.61             | 1.65        | 9.2          |       |
| 238   | ORF3a  | A*24:02 | 9              | VYFLQSINF   | -0.13315       | 100.00% (28/28) | Non-Toxin | 1.3              | 1.31      | -1.28     | 2.61             | 1.33        | 19.2         |       |
| 239   | ORF3a  | A*23:01 | 9              | VYFLQSINF   | -0.13315       | 100.00% (28/28) | Non-Toxin | 1.3              | 1.31      | -0.96     | 2.61             | 1.65        | 9.2          |       |
| 240   | ORF3a  | A*24:02 | 9              | VYFLQSINF   | -0.13315       | 100.00% (28/28) | Non-Toxin | 1.3              | 1.31      | -1.28     | 2.61             | 1.33        | 19.2         |       |
| 241   | ORF3a  | A*33:01 | 10             | YFLQSINFVR  | -0.03483       | 100.00% (28/28) | Non-Toxin | 1.09             | 0.74      | -1.27     | 1.82             | 0.56        | 18.5         |       |
| 242   | ORF3a  | A*02:01 | 9              | YLYALVYFL   | 0.13151        | 100.00% (28/28) | Non-Toxin | 1.45             | 0.52      | -0.38     | 1.96             | 1.58        | 2.4          |       |

| 243   | ORF3a | A*02:06 | 9              | YLYALVYFL    | 0.13151        | 100.00% (28/28) | Non-Toxin | 1.45             | 0.52      | -0.61     | 1.96             | 1.35        | 4.1          |  |
|-------|-------|---------|----------------|--------------|----------------|-----------------|-----------|------------------|-----------|-----------|------------------|-------------|--------------|--|
| 244   | ORF3a | A*02:03 | 9              | YLYALVYFL    | 0.13151        | 100.00% (28/28) | Non-Toxin | 1.45             | 0.52      | -0.76     | 1.96             | 1.21        | 5.7          |  |
| 245   | ORF3a | A*02:01 | 9              | YLYALVYFL    | 0.13151        | 100.00% (28/28) | Non-Toxin | 1.45             | 0.52      | -0.38     | 1.96             | 1.58        | 2.4          |  |
| 246   | ORF3a | A*02:06 | 9              | YLYALVYFL    | 0.13151        | 100.00% (28/28) | Non-Toxin | 1.45             | 0.52      | -0.61     | 1.96             | 1.35        | 4.1          |  |
| 247   | ORF3a | A*02:03 | 9              | YLYALVYFL    | 0.13151        | 100.00% (28/28) | Non-Toxin | 1.45             | 0.52      | -0.76     | 1.96             | 1.21        | 5.7          |  |
| 248   | ORF3a | A*24:02 | 9              | YYQLYSTQL    | -0.24301       | 100.00% (28/28) | Non-Toxin | 1.66             | 0.4       | -1.56     | 2.06             | 0.5         | 36.4         |  |
| 249   | ORF3a | A*23:01 | 9              | YYQLYSTQL    | -0.24301       | 100.00% (28/28) | Non-Toxin | 1.66             | 0.4       | -1.58     | 2.06             | 0.48        | 38.3         |  |
| S.No. | ORF   | Allele  | Peptide Length | Peptide      | Immunogenicity | Conservancy     | Toxicity  | Proteasome Score | TAP Score | MHC Score | Processing Score | Total Score | MHC IC50[nM] |  |
| 250   | ORF6  | A*02:01 | 10             | FHLVDFQVTI   | 0.12202        | 100.00% (34/34) | Non-Toxin | 1.57             | 0.22      | -1.16     | 1.78             | 0.62        | 14.5         |  |
| 251   | ORF6  | A*02:03 | 10             | FHLVDFQVTI   | 0.12202        | 100.00% (34/34) | Non-Toxin | 1.57             | 0.22      | -1.17     | 1.78             | 0.61        | 14.9         |  |
| 252   | ORF6  | A*02:06 | 9              | FQVTIAEIL    | 0.38115        | 100.00% (34/34) | Non-Toxin | 1.59             | 0.38      | -1.58     | 1.97             | 0.39        | 38.1         |  |
| 253   | ORF6  | A*02:03 | 9              | HLVDFQVTI    | 0.0982         | 100.00% (34/34) | Non-Toxin | 1.57             | 0.19      | -1.22     | 1.76             | 0.53        | 16.7         |  |
| 254   | ORF6  | A*02:01 | 9              | HLVDFQVTI    | 0.0982         | 100.00% (34/34) | Non-Toxin | 1.57             | 0.19      | -1.25     | 1.76             | 0.51        | 17.7         |  |
| 255   | ORF6  | A*30:02 | 9              | KVSIWNLDY    | 0.29343        | 100.00% (34/34) |           | 1.21             | 1.33      | -1.46     | 2.54             | 1.08        | 28.8         |  |
| 256   | ORF6  | A*30:02 | 9              | KVSIWNLDY    | 0.29343        | 100.00% (34/34) | Non-Toxin | 1.21             | 1.33      | -1.46     | 2.54             | 1.08        | 28.8         |  |
| 257   | ORF6  | A*30:02 | 10             | LSKSLTENKY   | -0.24668       | 100.00% (34/34) | Non-Toxin | 1.52             | 1.35      | -2.37     | 2.87             | 0.5         | 234.3        |  |
| 258   | ORF6  | B*58:01 | 8              | RTFKVSIW     | -0.18221       | 100.00% (34/34) | Non-Toxin | 1.42             | 0.54      | -1.34     | 1.97             | 0.63        | 21.7         |  |
| 259   | ORF6  | B*57:01 | 8              | RTFKVSIW     | -0.18221       | 100.00% (34/34) | Non-Toxin | 1.42             | 0.54      | -1.38     | 1.97             | 0.59        | 24           |  |
| S.No. | ORF   | Allele  | Peptide Length | Peptide      | Immunogenicity | Conservancy     | Toxicity  | Proteasome Score | TAP Score | MHC Score | Processing Score | Total Score | MHC IC50[nM] |  |
| 260   | ORF7a | A*02:03 | 10             | ALITLATCEL   | 0.1591         | 100.00% (28/28) | Non-Toxin | 1.69             | 0.54      | -1.66     | 2.23             | 0.57        | 45.8         |  |
| 261   | ORF7a | B*15:01 | 9              | ALTCFSTQF    | -0.1183        | 100.00% (28/28) | Non-Toxin | 1.46             | 1.11      | -1.91     | 2.57             | 0.66        | 82.2         |  |
| 262   | ORF7a | B*35:01 | 9              | CPDGVKHHVY   | -0.07008       | 100.00% (28/28) |           | 1.43             | 1.11      | -1.34     | 2.54             | 1.2         | 22           |  |
| 263   | ORF7a | B*35:01 | 9              | CPDGVKHHVY   | -0.07008       | 100.00% (28/28) | Non-Toxin | 1.43             | 1.11      | -1.34     | 2.54             | 1.2         | 22           |  |
| 264   | ORF7a | B*35:01 | 11             | FACPDGVKHHVY | -0.08544       | 100.00% (28/28) | Non-Toxin | 1.43             | 1.32      | -1.97     | 2.76             | 0.78        | 94.4         |  |
| 265   | ORF7a | B*15:01 | 10             | FALTCFSTQF   | -0.09369       | 100.00% (28/28) | Non-Toxin | 1.46             | 1.13      | -1.93     | 2.59             | 0.67        | 84.9         |  |
| 266   | ORF7a | B*35:01 | 10             | FALTCFSTQF   | -0.09369       | 100.00% (28/28) | Non-Toxin | 1.46             | 1.13      | -2.07     | 2.59             | 0.52        | 118.4        |  |
| 267   | ORF7a | A*68:01 | 10             | FITLCFTLKR   | -0.03588       | 100.00% (28/28) | Non-Toxin | 1.16             | 0.66      | -1.25     | 1.83             | 0.58        | 17.8         |  |
| 268   | ORF7a | B*15:01 | 9              | FLIVAAIVF    | 0.29611        | 100.00% (28/28) | Non-Toxin | 1.56             | 1.1       | -2.17     | 2.67             | 0.5         | 146.3        |  |
| 269   | ORF7a | B*15:01 | 9              | GYEGNSPF     | -0.01964       | 100.00% (28/28) | Non-Toxin | 0.85             | 1.12      | -1.34     | 1.96             | 0.63        | 21.7         |  |
| 270   | ORF7a | A*23:01 | 10             | IFLIVAAIVF   | 0.38189        | 100.00% (28/28) | Non-Toxin | 1.56             | 1.13      | -1.98     | 2.69             | 0.71        | 96.6         |  |
| 271   | ORF7a | A*02:01 | 9              | IFLALITL     | 0.1895         | 100.00% (28/28) | Non-Toxin | 1.92             | 0.49      | -1.83     | 2.4              | 0.57        | 68.1         |  |
| 272   | ORF7a | A*30:02 | 9              | ITLATCELY    | 0.10084        | 100.00% (28/28) | Non-Toxin | 1.23             | 1.3       | -1.73     | 2.53             | 0.8         | 53.3         |  |
| 273   | ORF7a | B*58:01 | 9              | ITLATCELY    | 0.10084        | 100.00% (28/28) | Non-Toxin | 1.23             | 1.3       | -1.84     | 2.53             | 0.68        | 69.7         |  |
| 274   | ORF7a | A*23:01 | 11             | KFALTCFSTQF  | -0.08981       | 100.00% (28/28) | Non-Toxin | 1.46             | 1.29      | -2.18     | 2.75             | 0.57        | 150.6        |  |
| 275   | ORF7a | B*35:01 | 9              | LATCELYHY    | 0.06119        | 100.00% (28/28) | Non-Toxin | 1.32             | 1.28      | -1.93     | 2.6              | 0.67        | 84.3         |  |
| 276   | ORF7a | B*15:01 | 11             | LLKEPCSSGTY  | -0.2981        | 100.00% (28/28) | Non-Toxin | 1.39             | 1.3       | -1.96     | 2.69             | 0.73        | 91.4         |  |
| 277   | ORF7a | B*58:01 | 10             | LTCFSTQFAF   | -0.01038       | 100.00% (28/28) | Non-Toxin | 1.32             | 1.16      | -1.54     | 2.48             | 0.94        | 34.8         |  |
| 278   | ORF7a | B*15:01 | 10             | LTCFSTQFAF   | -0.01038       | 100.00% (28/28) | Non-Toxin | 1.32             | 1.16      | -1.62     | 2.48             | 0.87        | 41.3         |  |
| 279   | ORF7a | A*30:01 | 9              | RARSVSPKL    | -0.40056       | 100.00% (28/28) | Non-Toxin | 1.57             | 0.59      | -1.23     | 2.15             | 0.93        | 16.9         |  |
| 280   | ORF7a | A*30:01 | 10             | RARSVSPKLF   | -0.46949       | 100.00% (28/28) | Non-Toxin | 1.09             | 1.27      | -1.89     | 2.37             | 0.48        | 77.5         |  |
| 281   | ORF7a | A*31:01 | 10             | RSVSPKLFIR   | -0.20775       | 100.00% (28/28) | Non-Toxin | 0.98             | 0.87      | -1.3      | 1.85             | 0.55        | 20           |  |
| S.No. | ORF   | Allele  | Peptide Length | Peptide      | Immunogenicity | Conservancy     | Toxicity  | Proteasome Score | TAP Score | MHC Score | Processing Score | Total Score | MHC IC50[nM] |  |
| 282   | ORF7b | A*23:01 | 11             | FYLCFLAFLLF  | 0.17781        | 100.00% (2/2)   | Non-Toxin | 1.24             | 1.12      | -1.75     | 2.36             | 0.61        | 56.8         |  |
| 283   | ORF7b | B*44:03 | 9              | IELSLIDFY    | 0.03153        | 100.00% (2/2)   | Non-Toxin | 1.13             | 1.24      | -1.83     | 2.37             | 0.54        | 67.4         |  |
| 284   | ORF7b | A*02:01 | 10             | IELSLIDFYL   | 0.06625        | 100.00% (2/2)   | Non-Toxin | 1.42             | 0.39      | -1.28     | 1.81             | 0.53        | 18.9         |  |
| 285   | ORF7b | A*02:01 | 9              | IIFWFSLEL    | 0.2683         | 100.00% (2/2)   | Non-Toxin | 1.65             | 0.55      | -1.2      | 2.21             | 1.01        | 15.7         |  |
| 286   | ORF7b | A*02:01 | 9              | IIFWFSLEL    | 0.2683         | 100.00% (2/2)   | Non-Toxin | 1.65             | 0.55      | -1.2      | 2.21             | 1.01        | 15.7         |  |
| 287   | ORF7b | A*02:06 | 9              | IIFWFSLEL    | 0.2683         | 100.00% (2/2)   | Non-Toxin | 1.65             | 0.55      | -1.55     | 2.21             | 0.66        | 35.5         |  |
| 288   | ORF7b | A*02:01 | 9              | LIDFYLCFL    | 0.13386        | 100.00% (2/2)   | Non-Toxin | 1.7              | 0.42      | -1.64     | 2.12             | 0.49        | 43.4         |  |
| 289   | ORF7b | B*58:01 | 10             | LSLIDFYLCF   | 0.22158        | 100.00% (2/2)   | Non-Toxin | 1.38             | 1.05      | -1.96     | 2.43             | 0.48        | 90.2         |  |
| 290   | ORF7b | B*44:03 | 10             | MIELSLIDFY   | 0.06184        | 100.00% (2/2)   | Non-Toxin | 1.13             | 1.24      | -1.63     | 2.36             | 0.74        | 42.5         |  |



| 291   | ORF7b     | B*15:01 | 9              | SLIDFYLCF   | 0.13518        | 100.00% (2/2)   | Non-Toxin | 1.38             | 1.18      | -1.76     | 2.56             | 0.8         | 57.2         |  |
|-------|-----------|---------|----------------|-------------|----------------|-----------------|-----------|------------------|-----------|-----------|------------------|-------------|--------------|--|
| 292   | ORF7b     | A*02:01 | 10             | SLIDFYLCFL  | 0.18838        | 100.00% (2/2)   | Non-Toxin | 1.7              | 0.5       | -0.74     | 2.2              | 1.46        | 5.5          |  |
| 293   | ORF7b     | A*02:03 | 10             | SLIDFYLCFL  | 0.18838        | 100.00% (2/2)   | Non-Toxin | 1.7              | 0.5       | -0.79     | 2.2              | 1.41        | 6.2          |  |
| 294   | ORF7b     | A*02:06 | 10             | SLIDFYLCFL  | 0.18838        | 100.00% (2/2)   | Non-Toxin | 1.7              | 0.5       | -0.93     | 2.2              | 1.27        | 8.6          |  |
| 295   | ORF7b     | A*02:01 | 10             | SLIDFYLCFL  | 0.18838        | 100.00% (2/2)   | Non-Toxin | 1.7              | 0.5       | -0.74     | 2.2              | 1.46        | 5.5          |  |
| 296   | ORF7b     | A*02:03 | 10             | SLIDFYLCFL  | 0.18838        | 100.00% (2/2)   | Non-Toxin | 1.7              | 0.5       | -0.79     | 2.2              | 1.41        | 6.2          |  |
| 297   | ORF7b     | A*02:06 | 10             | SLIDFYLCFL  | 0.18838        | 100.00% (2/2)   | Non-Toxin | 1.7              | 0.5       | -0.93     | 2.2              | 1.27        | 8.6          |  |
| 298   | ORF7b     | A*02:01 | 9              | YLCFLAFL    | 0.21865        | 100.00% (2/2)   | Non-Toxin | 1.36             | 0.37      | -0.9      | 1.73             | 0.83        | 7.9          |  |
| S.No. | ORF       | Allele  | Peptide Length | Peptide     | Immunogenicity | Conservancy     | Toxicity  | Proteasome Score | TAP Score | MHC Score | Processing Score | Total Score | MHC IC50[nM] |  |
| 299   | ORF8      | A*30:02 | 10             | CSFYEDFLEY  | 0.31272        | 100.00% (34/34) | Non-Toxin | 1.47             | 1.38      | -1.96     | 2.85             | 0.89        | 91.9         |  |
| 300   | ORF8      | A*01:01 | 10             | CSFYEDFLEY  | 0.31272        | 100.00% (34/34) | Non-Toxin | 1.47             | 1.38      | -2.03     | 2.85             | 0.82        | 108.2        |  |
| 301   | ORF8      | B*58:01 | 10             | CSFYEDFLEY  | 0.31272        | 100.00% (34/34) | Non-Toxin | 1.47             | 1.38      | -2.12     | 2.85             | 0.73        | 132.5        |  |
| 302   | ORF8      | A*11:01 | 10             | CSFYEDFLEY  | 0.31272        | 100.00% (34/34) | Non-Toxin | 1.47             | 1.38      | -2.29     | 2.85             | 0.56        | 195          |  |
| 303   | ORF8      | B*15:01 | 10             | CSFYEDFLEY  | 0.31272        | 100.00% (34/34) | Non-Toxin | 1.47             | 1.38      | -2.37     | 2.85             | 0.48        | 236.6        |  |
| 304   | ORF8      | B*15:01 | 9              | GIITVAAF    | 0.2148         | 100.00% (34/34) | Non-Toxin | 1.27             | 1.13      | -1.26     | 2.4              | 1.14        | 18.1         |  |
| 305   | ORF8      | B*15:01 | 9              | GIITVAAF    | 0.2148         | 100.00% (34/34) | Non-Toxin | 1.27             | 1.13      | -1.26     | 2.4              | 1.14        | 18.1         |  |
| 306   | ORF8      | A*30:02 | 10             | GSLVVRCSFY  | 0.00657        | 100.00% (34/34) | Non-Toxin | 1.38             | 1.24      | -1.82     | 2.61             | 0.79        | 66.4         |  |
| 307   | ORF8      | A*33:01 | 9              | HFYSKWYIR   | -0.09452       | 100.00% (34/34) | Non-Toxin | 1.08             | 0.76      | -0.68     | 1.84             | 1.16        | 4.8          |  |
| 308   | ORF8      | A*31:01 | 9              | HFYSKWYIR   | -0.09452       | 100.00% (34/34) | Non-Toxin | 1.08             | 0.76      | -0.79     | 1.84             | 1.05        | 6.2          |  |
| 309   | ORF8      | A*33:01 | 9              | HFYSKWYIR   | -0.09452       | 100.00% (34/34) | Non-Toxin | 1.08             | 0.76      | -0.68     | 1.84             | 1.16        | 4.8          |  |
| 310   | ORF8      | A*31:01 | 9              | HFYSKWYIR   | -0.09452       | 100.00% (34/34) | Non-Toxin | 1.08             | 0.76      | -0.79     | 1.84             | 1.05        | 6.2          |  |
| 311   | ORF8      | A*31:01 | 10             | IHFYSKWYIR  | -0.05367       | 100.00% (34/34) | Non-Toxin | 1.08             | 0.64      | -1.2      | 1.72             | 0.53        | 15.7         |  |
| 312   | ORF8      | A*30:02 | 9              | IQYIDIGNY   | 0.30442        | 100.00% (34/34) | Non-Toxin | 1.2              | 1.33      | -1.66     | 2.53             | 0.87        | 45.4         |  |
| 313   | ORF8      | B*15:01 | 9              | IQYIDIGNY   | 0.30442        | 100.00% (34/34) | Non-Toxin | 1.2              | 1.33      | -1.66     | 2.53             | 0.87        | 45.4         |  |
| 314   | ORF8      | B*40:01 | 10             | LEYHDVRVL   | 0.20083        | 100.00% (34/34) | Non-Toxin | 1.75             | 0.4       | -1.64     | 2.15             | 0.51        | 43.5         |  |
| 315   | ORF8      | B*15:01 | 10             | LGITVAAF    | 0.34746        | 100.00% (34/34) | Non-Toxin | 1.27             | 0.97      | -1.1      | 2.24             | 1.14        | 12.7         |  |
| 316   | ORF8      | B*15:01 | 10             | LGITVAAF    | 0.34746        | 100.00% (34/34) | Non-Toxin | 1.27             | 0.97      | -1.1      | 2.24             | 1.14        | 12.7         |  |
| 317   | ORF8      | B*15:01 | 10             | LQSQTHQPY   | -0.25674       | 100.00% (34/34) | Non-Toxin | 1                | 1.33      | -1.57     | 2.32             | 0.75        | 37           |  |
| 318   | ORF8      | A*30:02 | 9              | SFYEDFLEY   | 0.28049        | 100.00% (34/34) | Non-Toxin | 1.47             | 1.44      | -2.04     | 2.92             | 0.88        | 110.3        |  |
| 319   | ORF8      | B*35:01 | 9              | SFYEDFLEY   | 0.28049        | 100.00% (34/34) | Non-Toxin | 1.47             | 1.44      | -2.28     | 2.92             | 0.63        | 192.4        |  |
| S.No. | ORF       | Allele  | Peptide Length | Peptide     | Immunogenicity | Conservancy     | Toxicity  | Proteasome Score | TAP Score | MHC Score | Processing Score | Total Score | MHC IC50[nM] |  |
| 320   | S protein | A*30:02 | 9              | ASFSTFKCY   | -0.19397       | 100.00% (41/41) | Non-Toxin | 1.47             | 1.42      | -1.6      | 2.89             | 1.29        | 39.6         |  |
| 321   | S protein | B*35:01 | 9              | CVADYSVLY   | -0.09595       | 100.00% (41/41) | Non-Toxin | 1.51             | 1.38      | -1.39     | 2.89             | 1.5         | 24.4         |  |
| 322   | S protein | A*26:01 | 9              | CVADYSVLY   | -0.09595       | 100.00% (41/41) | Non-Toxin | 1.51             | 1.38      | -1.56     | 2.89             | 1.34        | 36           |  |
| 323   | S protein | A*01:01 | 9              | CVADYSVLY   | -0.09595       | 100.00% (41/41) | Non-Toxin | 1.51             | 1.38      | -1.74     | 2.89             | 1.16        | 54.5         |  |
| 324   | S protein | B*35:01 | 9              | FAMQMAYRF   | -0.28061       | 100.00% (41/41) | Non-Toxin | 1.45             | 1.05      | -0.8      | 2.5              | 1.7         | 6.3          |  |
| 325   | S protein | B*53:01 | 9              | FAMQMAYRF   | -0.28061       | 100.00% (41/41) | Non-Toxin | 1.45             | 1.05      | -1.15     | 2.5              | 1.35        | 14.1         |  |
| 326   | S protein | B*58:01 | 9              | FAMQMAYRF   | -0.28061       | 100.00% (41/41) | Non-Toxin | 1.45             | 1.05      | -1.42     | 2.5              | 1.07        | 26.4         |  |
| 327   | S protein | A*23:01 | 9              | FAMQMAYRF   | -0.28061       | 100.00% (41/41) | Non-Toxin | 1.45             | 1.05      | -1.43     | 2.5              | 1.07        | 26.7         |  |
| 328   | S protein | B*40:01 | 9              | FEYVSQPFL   | -0.17076       | 100.00% (41/41) | Non-Toxin | 1.84             | 0.4       | -1.14     | 2.24             | 1.09        | 13.9         |  |
| 329   | S protein | B*53:01 | 10             | FLPFFSNVTW  | 0.11853        | 100.00% (41/41) | Non-Toxin | 1.69             | 0.37      | -0.88     | 2.06             | 1.18        | 7.6          |  |
| 330   | S protein | B*35:01 | 10             | FPNITNLCPF  | 0.1009         | 100.00% (41/41) | Non-Toxin | 1.02             | 0.94      | -0.59     | 1.97             | 1.38        | 3.9          |  |
| 331   | S protein | B*35:01 | 11             | FPQSAPHGVVF | -0.05441       | 100.00% (41/41) | Non-Toxin | 1.56             | 0.94      | -1.47     | 2.5              | 1.02        | 29.7         |  |
| 332   | S protein | B*35:01 | 9              | FVFKNIDGY   | -0.0215        | 100.00% (41/41) | Non-Toxin | 1.1              | 1.26      | -1.18     | 2.36             | 1.19        | 15.1         |  |
| 333   | S protein | A*26:01 | 9              | FVFKNIDGY   | -0.0215        | 100.00% (41/41) | Non-Toxin | 1.1              | 1.26      | -1.36     | 2.36             | 1.01        | 22.8         |  |
| 334   | S protein | B*58:01 | 9              | GTITSGWTF   | 0.16268        | 100.00% (41/41) | Non-Toxin | 1.58             | 1.11      | -1.65     | 2.69             | 1.04        | 44.6         |  |
| 335   | S protein | B*35:01 | 9              | IPFAMQMAY   | -0.32801       | 100.00% (41/41) | Non-Toxin | 1.42             | 1.17      | -0.36     | 2.6              | 2.24        | 2.3          |  |
| 336   | S protein | B*53:01 | 9              | IPFAMQMAY   | -0.32801       | 100.00% (41/41) | Non-Toxin | 1.42             | 1.17      | -1.23     | 2.6              | 1.37        | 16.9         |  |
| 337   | S protein | B*58:01 | 10             | KRSFIEDLLF  | 0.29624        | 100.00% (41/41) | Non-Toxin | 1.23             | 1.26      | -1.11     | 2.49             | 1.37        | 12.9         |  |
| 338   | S protein | A*30:02 | 10             | KSFTVEKGIY  | 0.11812        | 100.00% (41/41) | Non-Toxin | 1.25             | 1.4       | -1.37     | 2.65             | 1.28        | 23.4         |  |
| 339   | S protein | B*58:01 | 10             | KSNIRGWIF   | 0.60842        | 100.00% (41/41) | Non-Toxin | 1.45             | 1.05      | -1.43     | 2.5              | 1.07        | 27           |  |

|     |           |         |    |             |          |                 |           |      |      |       |      |      |      |  |
|-----|-----------|---------|----|-------------|----------|-----------------|-----------|------|------|-------|------|------|------|--|
| 340 | S protein | A*30:02 | 10 | KVGGNYNYLY  | 0.01951  | 100.00% (41/41) | Non-Toxin | 1.4  | 1.33 | -1.43 | 2.73 | 1.29 | 27.1 |  |
| 341 | S protein | A*23:01 | 10 | KWPWYIWLGF  | 0.56424  | 100.00% (41/41) | Non-Toxin | 1.26 | 1.25 | -1.04 | 2.51 | 1.47 | 11   |  |
| 342 | S protein | A*24:02 | 10 | KWPWYIWLGF  | 0.56424  | 100.00% (41/41) | Non-Toxin | 1.26 | 1.25 | -1.14 | 2.51 | 1.37 | 13.9 |  |
| 343 | S protein | A*01:01 | 10 | LLTDEMIQY   | 0.05204  | 100.00% (41/41) | Non-Toxin | 1.21 | 1.2  | -1.08 | 2.42 | 1.33 | 12.1 |  |
| 344 | S protein | B*53:01 | 9  | LPFFSNVTW   | 0.04613  | 100.00% (41/41) | Non-Toxin | 1.69 | 0.26 | -0.77 | 1.95 | 1.18 | 5.9  |  |
| 345 | S protein | B*35:01 | 9  | LPFNDGVYF   | 0.11767  | 100.00% (41/41) | Non-Toxin | 1.41 | 1.04 | -0.54 | 2.45 | 1.9  | 3.5  |  |
| 346 | S protein | B*53:01 | 9  | LPFNDGVYF   | 0.11767  | 100.00% (41/41) | Non-Toxin | 1.41 | 1.04 | -0.98 | 2.45 | 1.47 | 9.6  |  |
| 347 | S protein | B*35:01 | 11 | LQIPFAMQMAY | -0.22124 | 100.00% (41/41) | Non-Toxin | 1.42 | 1.4  | -1.25 | 2.82 | 1.57 | 17.8 |  |
| 348 | S protein | B*15:01 | 11 | LQIPFAMQMAY | -0.22124 | 100.00% (41/41) | Non-Toxin | 1.42 | 1.4  | -1.64 | 2.82 | 1.19 | 43.2 |  |
| 349 | S protein | A*01:01 | 9  | LTDEMIQY    | 0.02757  | 100.00% (41/41) | Non-Toxin | 1.21 | 1.21 | -0.72 | 2.42 | 1.71 | 5.2  |  |
| 350 | S protein | A*23:01 | 10 | LYNSASFSTF  | -0.29831 | 100.00% (41/41) | Non-Toxin | 1.33 | 1.2  | -0.95 | 2.52 | 1.57 | 9    |  |
| 351 | S protein | A*24:02 | 10 | LYNSASFSTF  | -0.29831 | 100.00% (41/41) | Non-Toxin | 1.33 | 1.2  | -0.99 | 2.52 | 1.53 | 9.8  |  |
| 352 | S protein | A*68:01 | 10 | NVYADSFVIR  | 0.12147  | 100.00% (41/41) | Non-Toxin | 1.47 | 0.81 | -1.03 | 2.28 | 1.24 | 10.8 |  |
| 353 | S protein | A*24:02 | 9  | NVNYLYRLF   | 0.0171   | 100.00% (41/41) | Non-Toxin | 1.2  | 1.18 | -1.37 | 2.38 | 1.01 | 23.4 |  |
| 354 | S protein | A*33:01 | 10 | NVNYLYRLFR  | 0.08754  | 100.00% (41/41) | Non-Toxin | 1.16 | 0.72 | -0.86 | 1.88 | 1.02 | 7.3  |  |
| 355 | S protein | B*35:01 | 10 | QIPFAMQMAY  | -0.25308 | 100.00% (41/41) | Non-Toxin | 1.42 | 1.35 | -1.16 | 2.77 | 1.61 | 14.5 |  |
| 356 | S protein | A*30:02 | 9  | RISNCVADY   | -0.02787 | 100.00% (41/41) | Non-Toxin | 1.16 | 1.47 | -1.26 | 2.63 | 1.37 | 18.2 |  |
| 357 | S protein | B*58:01 | 9  | RSFIEDLLF   | 0.27446  | 100.00% (41/41) | Non-Toxin | 1.23 | 1.32 | -0.72 | 2.54 | 1.82 | 5.3  |  |
| 358 | S protein | B*57:01 | 9  | RSFIEDLLF   | 0.27446  | 100.00% (41/41) | Non-Toxin | 1.23 | 1.32 | -1.18 | 2.54 | 1.36 | 15.2 |  |
| 359 | S protein | B*15:01 | 10 | RVYSTGSNVF  | -0.23394 | 100.00% (41/41) | Non-Toxin | 1.51 | 1.32 | -1.02 | 2.83 | 1.81 | 10.5 |  |
| 360 | S protein | A*32:01 | 10 | RVYSTGSNVF  | -0.23394 | 100.00% (41/41) | Non-Toxin | 1.51 | 1.32 | -1.69 | 2.83 | 1.14 | 48.9 |  |
| 361 | S protein | B*35:01 | 9  | SANNCTFEY   | 0.13273  | 100.00% (41/41) | Non-Toxin | 1.18 | 1.3  | -1.11 | 2.48 | 1.37 | 12.8 |  |
| 362 | S protein | B*15:01 | 10 | SVASQSIAY   | -0.16721 | 100.00% (41/41) | Non-Toxin | 1.32 | 1.42 | -1.74 | 2.74 | 1    | 55.2 |  |
| 363 | S protein | B*35:01 | 9  | VASQSIAY    | -0.0709  | 100.00% (41/41) | Non-Toxin | 1.32 | 1.34 | -0.86 | 2.66 | 1.8  | 7.2  |  |
| 364 | S protein | A*24:02 | 10 | VYSSANNCTF  | -0.21728 | 100.00% (41/41) | Non-Toxin | 1.42 | 1.3  | -1.62 | 2.71 | 1.09 | 41.7 |  |
| 365 | S protein | A*23:01 | 10 | VYSSANNCTF  | -0.21728 | 100.00% (41/41) | Non-Toxin | 1.42 | 1.3  | -1.71 | 2.71 | 1.01 | 50.8 |  |
| 366 | S protein | A*26:01 | 9  | WTAGAAAYY   | 0.15259  | 100.00% (41/41) | Non-Toxin | 1.24 | 1.24 | -1.06 | 2.48 | 1.41 | 11.6 |  |
| 367 | S protein | A*68:01 | 9  | WTAGAAAYY   | 0.15259  | 100.00% (41/41) | Non-Toxin | 1.24 | 1.24 | -1.37 | 2.48 | 1.11 | 23.5 |  |
| 368 | S protein | A*02:01 | 9  | YLPRTFLL    | 0.1305   | 100.00% (41/41) | Non-Toxin | 1.46 | 0.39 | -0.66 | 1.85 | 1.18 | 4.6  |  |
| 369 | S protein | B*35:01 | 9  | YSSANNCTF   | -0.04954 | 100.00% (41/41) | Non-Toxin | 1.42 | 1.13 | -1.29 | 2.54 | 1.26 | 19.4 |  |
| 370 | S protein | B*58:01 | 9  | YSSANNCTF   | -0.04954 | 100.00% (41/41) | Non-Toxin | 1.42 | 1.13 | -1.49 | 2.54 | 1.05 | 31.1 |  |
| 371 | S protein | B*15:01 | 10 | YSVLYNSASF  | -0.22703 | 100.00% (41/41) | Non-Toxin | 1.39 | 1.08 | -1.36 | 2.47 | 1.11 | 23   |  |
| 372 | S protein | A*30:02 | 10 | YTNSFTRGVY  | 0.08467  | 95.12% (39/41)  | Non-Toxin | 1.36 | 1.28 | -1.26 | 2.64 | 1.38 | 18.2 |  |
| 373 | S protein | A*01:01 | 10 | YTNSFTRGVY  | 0.08467  | 95.12% (39/41)  | Non-Toxin | 1.36 | 1.28 | -1.45 | 2.64 | 1.19 | 28   |  |
| 374 | S protein | B*15:01 | 10 | YTNSFTRGVY  | 0.08467  | 95.12% (39/41)  | Non-Toxin | 1.36 | 1.28 | -1.6  | 2.64 | 1.04 | 40.2 |  |
| 375 | S protein | A*01:01 | 11 | YTNSFTRGVY  | 0.09821  | 95.12% (39/41)  | Non-Toxin | 1.45 | 1.28 | -1.51 | 2.72 | 1.22 | 32.1 |  |
| 376 | S protein | A*23:01 | 11 | YYVGYLQPRTF | -0.02378 | 100.00% (41/41) | Non-Toxin | 1.36 | 1.31 | -1.38 | 2.67 | 1.29 | 24   |  |
| 377 | S protein | A*24:02 | 11 | YYVGYLQPRTF | -0.02378 | 100.00% (41/41) | Non-Toxin | 1.36 | 1.31 | -1.67 | 2.67 | 1    | 46.5 |  |

**Supplementary Table S2:** High Scoring CTL epitopes-HLA allele pairs screened from entire proteome of SARS-CoV-2 by the “MHC-I Binding Predictions” tool of IEDB. These epitopes were further utilized to identify the potentially immunogenic multiple epitope cluster based CTL Ag-Patches from the entire proteome of the SRAS-CoV-2. The epitopes shown in **RED** are the epitope which form Overlapping epitope clusters. The screened epitopes are in consensus with the previous studies [Srivastava et al. 2020a; Srivastava et al., 2020b and Grifoni et al., 2020a].

| S.No. | ORF       | Allele  | Length | Peptide    | Immunogenicity | Method used                            | Percentile Rank | Conservancy      | Toxicity  |
|-------|-----------|---------|--------|------------|----------------|----------------------------------------|-----------------|------------------|-----------|
| 378   | E Protein | A*02:01 | 9      | FLAFVVFL   | 0.30188        | Consensus (ann/comblib_sidney2008/smm) | 0.2             | 99.59% (480/482) | Non-Toxin |
| 379   | E Protein | A*02:03 | 9      | FLAFVVFL   | 0.30188        | Consensus (ann/smm)                    | 0.25            | 99.59% (480/482) | Non-Toxin |
| 380   | E Protein | A*02:06 | 9      | FLAFVVFL   | 0.30188        | Consensus (ann/smm)                    | 0.53            | 99.59% (480/482) | Non-Toxin |
| 381   | E Protein | A*02:01 | 10     | FLAFVVFLV  | 0.30526        | Consensus (ann/smm)                    | 0.15            | 99.59% (480/482) | Non-Toxin |
| 382   | E Protein | A*02:03 | 10     | FLAFVVFLV  | 0.30526        | Consensus (ann/smm)                    | 0.23            | 99.59% (480/482) | Non-Toxin |
| 383   | E Protein | A*02:06 | 10     | FLAFVVFLV  | 0.30526        | Consensus (ann/smm)                    | 0.47            | 99.59% (480/482) | Non-Toxin |
| 384   | E Protein | A*02:01 | 9      | FLLVTLAIL  | 0.17608        | Consensus (ann/comblib_sidney2008/smm) | 0.43            | 99.59% (480/482) | Non-Toxin |
| 385   | E Protein | A*02:06 | 9      | FVFLLVTL   | 0.16748        | Consensus (ann/smm)                    | 0.46            | 99.59% (480/482) | Non-Toxin |
| 386   | E Protein | B*15:01 | 10     | ILTALRLCAY | 0.05849        | Consensus (ann/smm)                    | 0.41            | 99.17% (478/482) | Non-Toxin |
| 387   | E Protein | B*51:01 | 9      | LAFVVFLV   | 0.2141         | Consensus (ann/comblib_sidney2008/smm) | 0.2             | 99.59% (480/482) | Non-Toxin |
| 388   | E Protein | A*02:01 | 11     | LFLAFVVFLV | 0.32453        | Consensus (ann/smm)                    | 0.39            | 99.59% (480/482) | Non-Toxin |
| 389   | E Protein | B*15:01 | 9      | LLFLAFVVF  | 0.2341         | Consensus (ann/comblib_sidney2008/smm) | 0.1             | 99.59% (480/482) | Non-Toxin |
| 390   | E Protein | A*32:01 | 9      | LLFLAFVVF  | 0.2341         | Consensus (ann/comblib_sidney2008/smm) | 0.3             | 99.59% (480/482) | Non-Toxin |
| 391   | E Protein | A*02:01 | 10     | LLFLAFVFL  | 0.32104        | Consensus (ann/smm)                    | 0.48            | 99.59% (480/482) | Non-Toxin |
| 392   | E Protein | A*01:01 | 9      | LTALRLCAY  | 0.01886        | Consensus (ann/smm)                    | 0.12            | 99.17% (478/482) | Non-Toxin |
| 393   | E Protein | A*26:01 | 9      | LTALRLCAY  | 0.01886        | Consensus (ann/smm)                    | 0.41            | 99.17% (478/482) | Non-Toxin |
| 394   | E Protein | B*15:01 | 9      | LVKPSFYVY  | -0.11106       | Consensus (ann/comblib_sidney2008/smm) | 0.2             | 99.59% (480/482) | Non-Toxin |
| 395   | E Protein | A*30:02 | 9      | LVKPSFYVY  | -0.11106       | Consensus (ann/smm)                    | 0.46            | 99.59% (480/482) | Non-Toxin |
| 396   | E Protein | A*68:02 | 10     | NSVLLFLAFV | 0.19642        | Consensus (ann/smm)                    | 0.38            | 99.59% (480/482) | Non-Toxin |
| 397   | E Protein | A*31:01 | 9      | RVKNLNSSR  | -0.32968       | Consensus (ann/smm)                    | 0.16            | 99.59% (480/482) | Non-Toxin |
| 398   | E Protein | B*40:01 | 9      | SEETGTLIV  | 0.2095         | Consensus (ann/smm)                    | 0.45            | 99.59% (480/482) | Non-Toxin |
| 399   | E Protein | A*02:06 | 9      | SLVKPSFYV  | -0.27349       | Consensus (ann/smm)                    | 0.4             | 99.59% (480/482) | Non-Toxin |
| 400   | E Protein | A*02:01 | 9      | SLVKPSFYV  | -0.27349       | Consensus (ann/comblib_sidney2008/smm) | 0.5             | 99.59% (480/482) | Non-Toxin |
| 401   | E Protein | B*15:01 | 10     | SLVKPSFYVY | -0.2443        | Consensus (ann/smm)                    | 0.28            | 99.59% (480/482) | Non-Toxin |
| 402   | E Protein | A*30:02 | 10     | SLVKPSFYVY | -0.2443        | Consensus (ann/smm)                    | 0.58            | 99.59% (480/482) | Non-Toxin |
| 403   | E Protein | A*02:06 | 9      | SVLLFLAFV  | 0.19022        | Consensus (ann/smm)                    | 0.33            | 99.59% (480/482) | Non-Toxin |
| 404   | E Protein | A*02:06 | 10     | SVLLFLAFVV | 0.24819        | Consensus (ann/smm)                    | 0.48            | 99.59% (480/482) | Non-Toxin |
| 405   | E Protein | A*68:01 | 9      | TLAILTALR  | 0.1989         | Consensus (ann/smm)                    | 0.21            | 99.17% (478/482) | Non-Toxin |
| 406   | E Protein | A*23:01 | 9      | VFLLVTLAI  | 0.07548        | Consensus (ann/smm)                    | 0.5             | 99.59% (480/482) | Non-Toxin |
| 407   | E Protein | A*02:01 | 9      | VLLFLAFVV  | 0.26315        | Consensus (ann/comblib_sidney2008/smm) | 0.3             | 99.59% (480/482) | Non-Toxin |
| 408   | E Protein | B*15:01 | 10     | VLLFLAFVVF | 0.31066        | Consensus (ann/smm)                    | 0.46            | 99.59% (480/482) | Non-Toxin |
| 409   | E Protein | A*30:02 | 9      | VSLVKPSFY  | -0.25372       | Consensus (ann/smm)                    | 0.33            | 99.59% (480/482) | Non-Toxin |
| 410   | E Protein | A*68:01 | 10     | VTLAILTALR | 0.21765        | Consensus (ann/smm)                    | 0.52            | 99.17% (478/482) | Non-Toxin |
| S.No. | ORF       | Allele  | Length | Peptide    | Immunogenicity | Method used                            | Percentile Rank | Conservancy      | Toxicity  |
| 411   | M Protein | B*58:01 | 10     | AMACLVGLMW | -0.09221       | Consensus (ann/smm)                    | 0.41            | 98.53% (470/477) | Non-Toxin |
| 412   | M Protein | B*44:02 | 10     | AMACLVGLMW | -0.09221       | Consensus (ann/smm)                    | 0.41            | 98.53% (470/477) | Non-Toxin |
| 413   | M Protein | A*30:01 | 9      | ANRNRFYI   | 0.15937        | Consensus (ann/comblib_sidney2008/smm) | 0.5             | 99.16% (473/477) | Non-Toxin |
| 414   | M Protein | A*31:01 | 8      | ASFRLFAR   | 0.2225         | ann                                    | 0.27            | 99.79% (476/477) | Non-Toxin |
| 415   | M Protein | A*31:01 | 10     | ASFRLFARTR | 0.29647        | Consensus (ann/smm)                    | 0.27            | 99.79% (476/477) | Non-Toxin |
| 416   | M Protein | A*30:02 | 9      | ATSRTLSYY  | -0.11604       | Consensus (ann/smm)                    | 0.17            | 98.95% (472/477) | Non-Toxin |
| 417   | M Protein | A*01:01 | 9      | ATSRTLSYY  | -0.11604       | Consensus (ann/smm)                    | 0.17            | 98.95% (472/477) | Non-Toxin |
| 418   | M Protein | A*26:01 | 9      | ATSRTLSYY  | -0.11604       | Consensus (ann/smm)                    | 0.26            | 98.95% (472/477) | Non-Toxin |
| 419   | M Protein | A*11:01 | 10     | ATSRTLSYYK | -0.13563       | Consensus (ann/smm)                    | 0.06            | 98.95% (472/477) | Non-Toxin |

|     |           |         |    |              |          |                                        |      |                  |           |  |
|-----|-----------|---------|----|--------------|----------|----------------------------------------|------|------------------|-----------|--|
| 420 | M Protein | A*03:01 | 10 | ATSRTLSYYK   | -0.13563 | Consensus (ann/smm)                    | 0.14 | 98.95% (472/477) | Non-Toxin |  |
| 421 | M Protein | A*30:01 | 10 | ATSRTLSYYK   | -0.13563 | Consensus (ann/smm)                    | 0.17 | 98.95% (472/477) | Non-Toxin |  |
| 422 | M Protein | A*31:01 | 9  | AVILRGHLR    | 0.13516  | Consensus (ann/smm)                    | 0.43 | 99.79% (476/477) | Non-Toxin |  |
| 423 | M Protein | A*30:02 | 10 | AYANRNRFY    | 0.19133  | Consensus (ann/smm)                    | 0.24 | 98.95% (472/477) | Non-Toxin |  |
| 424 | M Protein | A*30:02 | 10 | AYSRYRIGNY   | 0.19528  | Consensus (ann/smm)                    | 0.27 | 98.32% (469/477) | Non-Toxin |  |
| 425 | M Protein | B*15:01 | 10 | CLVGLMWLSY   | -0.03181 | Consensus (ann/smm)                    | 0.49 | 97.48% (465/477) | Non-Toxin |  |
| 426 | M Protein | A*30:02 | 10 | DSGFAAYSRY   | 0.09214  | Consensus (ann/smm)                    | 0.38 | 98.32% (469/477) | Non-Toxin |  |
| 427 | M Protein | B*44:03 | 10 | EELKLLQW     | -0.43502 | Consensus (ann/smm)                    | 0.2  | 98.74% (471/477) | Non-Toxin |  |
| 428 | M Protein | B*44:02 | 10 | EELKLLQW     | -0.43502 | Consensus (ann/smm)                    | 0.24 | 98.74% (471/477) | Non-Toxin |  |
| 429 | M Protein | A*23:01 | 11 | EQWNLVIGFLF  | 0.34861  | Consensus (ann/smm)                    | 0.38 | 99.16% (473/477) | Non-Toxin |  |
| 430 | M Protein | B*51:01 | 9  | FAAYSRYRI    | -0.07628 | Consensus (ann/comblib_sidney2008/smm) | 0.46 | 98.32% (469/477) | Non-Toxin |  |
| 431 | M Protein | A*68:02 | 9  | FAAYSRYRI    | -0.07628 | Consensus (ann/comblib_sidney2008/smm) | 0.5  | 98.32% (469/477) | Non-Toxin |  |
| 432 | M Protein | B*35:01 | 9  | FAYANRNRF    | 0.10537  | Consensus (ann/comblib_sidney2008/smm) | 0.3  | 98.95% (472/477) | Non-Toxin |  |
| 433 | M Protein | A*68:01 | 10 | FIASFRLFAR   | 0.12185  | Consensus (ann/smm)                    | 0.12 | 99.79% (476/477) | Non-Toxin |  |
| 434 | M Protein | A*33:01 | 10 | FIASFRLFAR   | 0.12185  | Consensus (ann/smm)                    | 0.14 | 99.79% (476/477) | Non-Toxin |  |
| 435 | M Protein | A*31:01 | 10 | FIASFRLFAR   | 0.12185  | Consensus (ann/smm)                    | 0.3  | 99.79% (476/477) | Non-Toxin |  |
| 436 | M Protein | A*02:01 | 9  | FLFLTWICL    | 0.35397  | Consensus (ann/comblib_sidney2008/smm) | 0.4  | 98.95% (472/477) | Non-Toxin |  |
| 437 | M Protein | A*02:01 | 10 | FLFLTWICLL   | 0.35364  | Consensus (ann/smm)                    | 0.15 | 98.95% (472/477) | Non-Toxin |  |
| 438 | M Protein | A*02:01 | 10 | FLWLLWPVTL   | 0.31272  | Consensus (ann/smm)                    | 0.28 | 98.53% (470/477) | Non-Toxin |  |
| 439 | M Protein | A*02:01 | 10 | FLYIILKLI    | 0.2226   | Consensus (ann/smm)                    | 0.29 | 98.53% (470/477) | Non-Toxin |  |
| 440 | M Protein | B*08:01 | 10 | FRLFARTRSM   | 0.18626  | Consensus (ann/smm)                    | 0.43 | 99.79% (476/477) | Non-Toxin |  |
| 441 | M Protein | A*31:01 | 9  | GFAAYSRYR    | -0.06574 | Consensus (ann/smm)                    | 0.41 | 98.32% (469/477) | Non-Toxin |  |
| 442 | M Protein | A*02:01 | 9  | GLMWLSYFI    | 0.06464  | Consensus (ann/comblib_sidney2008/smm) | 0.2  | 97.48% (465/477) | Non-Toxin |  |
| 443 | M Protein | A*32:01 | 9  | GLMWLSYFI    | 0.06464  | Consensus (ann/comblib_sidney2008/smm) | 0.4  | 97.48% (465/477) | Non-Toxin |  |
| 444 | M Protein | A*11:01 | 9  | GTITVEELK    | 0.29473  | Consensus (ann/smm)                    | 0.36 | 98.74% (471/477) | Non-Toxin |  |
| 445 | M Protein | A*68:01 | 9  | GTITVEELK    | 0.29473  | Consensus (ann/smm)                    | 0.47 | 98.74% (471/477) | Non-Toxin |  |
| 446 | M Protein | A*11:01 | 10 | GTITVEELKK   | 0.17885  | Consensus (ann/smm)                    | 0.27 | 98.53% (470/477) | Non-Toxin |  |
| 447 | M Protein | B*51:01 | 9  | IAIAMAACLV   | -0.10358 | Consensus (ann/comblib_sidney2008/smm) | 0.5  | 99.58% (475/477) | Non-Toxin |  |
| 448 | M Protein | B*58:01 | 11 | IAMAACLVGLMW | -0.12079 | Consensus (ann/smm)                    | 0.42 | 98.53% (470/477) | Non-Toxin |  |
| 449 | M Protein | A*33:01 | 9  | IASFRLFAR    | 0.22572  | Consensus (ann/smm)                    | 0.23 | 99.79% (476/477) | Non-Toxin |  |
| 450 | M Protein | A*68:01 | 9  | IASFRLFAR    | 0.22572  | Consensus (ann/smm)                    | 0.26 | 99.79% (476/477) | Non-Toxin |  |
| 451 | M Protein | A*31:01 | 9  | IASFRLFAR    | 0.22572  | Consensus (ann/smm)                    | 0.29 | 99.79% (476/477) | Non-Toxin |  |
| 452 | M Protein | A*02:06 | 9  | IFLWLLWPV    | 0.37851  | Consensus (ann/smm)                    | 0.28 | 98.53% (470/477) | Non-Toxin |  |
| 453 | M Protein | B*40:01 | 11 | KEITVATSRTL  | 0.10899  | ann                                    | 0.42 | 98.74% (471/477) | Non-Toxin |  |
| 454 | M Protein | A*32:01 | 11 | KKLLEQWNLVI  | 0.19431  | ann                                    | 0.39 | 98.74% (471/477) | Non-Toxin |  |
| 455 | M Protein | B*58:01 | 9  | KLIFLWLLW    | 0.34287  | Consensus (ann/comblib_sidney2008/smm) | 0.2  | 98.32% (469/477) | Non-Toxin |  |
| 456 | M Protein | A*32:01 | 9  | KLIFLWLLW    | 0.34287  | Consensus (ann/comblib_sidney2008/smm) | 0.3  | 98.32% (469/477) | Non-Toxin |  |
| 457 | M Protein | B*57:01 | 9  | KLIFLWLLW    | 0.34287  | Consensus (ann/smm)                    | 0.42 | 98.32% (469/477) | Non-Toxin |  |
| 458 | M Protein | A*02:01 | 11 | KLIFLWLLWPV  | 0.52512  | Consensus (ann/smm)                    | 0.14 | 98.11% (468/477) | Non-Toxin |  |
| 459 | M Protein | A*32:01 | 11 | KLIFLWLLWPV  | 0.52512  | ann                                    | 0.2  | 98.11% (468/477) | Non-Toxin |  |
| 460 | M Protein | A*02:06 | 9  | KLLEQWNLV    | 0.18092  | Consensus (ann/smm)                    | 0.17 | 98.95% (472/477) | Non-Toxin |  |
| 461 | M Protein | A*02:01 | 9  | KLLEQWNLV    | 0.18092  | Consensus (ann/comblib_sidney2008/smm) | 0.4  | 98.95% (472/477) | Non-Toxin |  |
| 462 | M Protein | A*32:01 | 11 | KLLEQWNLVIG  | 0.29591  | ann                                    | 0.38 | 98.95% (472/477) | Non-Toxin |  |
| 463 | M Protein | B*44:02 | 10 | LEQWNLVIGF   | 0.33917  | Consensus (ann/smm)                    | 0.29 | 99.16% (473/477) | Non-Toxin |  |
| 464 | M Protein | B*44:03 | 10 | LEQWNLVIGF   | 0.33917  | Consensus (ann/smm)                    | 0.48 | 99.16% (473/477) | Non-Toxin |  |
| 465 | M Protein | A*02:06 | 10 | LIFLWLLWPV   | 0.40176  | Consensus (ann/smm)                    | 0.08 | 98.32% (469/477) | Non-Toxin |  |
| 466 | M Protein | A*02:01 | 10 | LIFLWLLWPV   | 0.40176  | Consensus (ann/smm)                    | 0.15 | 98.32% (469/477) | Non-Toxin |  |
| 467 | M Protein | A*02:03 | 10 | LIFLWLLWPV   | 0.40176  | Consensus (ann/smm)                    | 0.3  | 98.32% (469/477) | Non-Toxin |  |
| 468 | M Protein | B*15:01 | 10 | LLWPVTLACF   | 0.12982  | Consensus (ann/smm)                    | 0.13 | 98.53% (470/477) | Non-Toxin |  |
| 469 | M Protein | A*02:01 | 11 | LLWPVTLACFV  | 0.18767  | Consensus (ann/smm)                    | 0.35 | 98.53% (470/477) | Non-Toxin |  |
| 470 | M Protein | B*15:01 | 11 | LMWLSYFIASF  | 0.07168  | ann                                    | 0.42 | 97.69% (466/477) | Non-Toxin |  |



|     |           |         |    |              |          |                                        |      |                  |           |  |
|-----|-----------|---------|----|--------------|----------|----------------------------------------|------|------------------|-----------|--|
| 471 | M Protein | A*23:01 | 11 | LMWLSYFIASF  | 0.07168  | Consensus (ann/smm)                    | 0.47 | 97.69% (466/477) | Non-Toxin |  |
| 472 | M Protein | A*68:01 | 9  | LSYFIASFR    | 0.21181  | Consensus (ann/smm)                    | 0.11 | 97.90% (467/477) | Non-Toxin |  |
| 473 | M Protein | A*31:01 | 9  | LSYFIASFR    | 0.21181  | Consensus (ann/smm)                    | 0.17 | 97.90% (467/477) | Non-Toxin |  |
| 474 | M Protein | A*33:01 | 9  | LSYFIASFR    | 0.21181  | Consensus (ann/smm)                    | 0.41 | 97.90% (467/477) | Non-Toxin |  |
| 475 | M Protein | A*03:01 | 9  | LSYFIASFR    | 0.21181  | Consensus (ann/smm)                    | 0.48 | 97.90% (467/477) | Non-Toxin |  |
| 476 | M Protein | A*23:01 | 11 | LSYFIASFRFLF | 0.2706   | Consensus (ann/smm)                    | 0.34 | 97.90% (467/477) | Non-Toxin |  |
| 477 | M Protein | B*53:01 | 10 | LVIGFLFTW    | 0.30402  | Consensus (ann/smm)                    | 0.15 | 98.95% (472/477) | Non-Toxin |  |
| 478 | M Protein | A*23:01 | 9  | LWLLWPVTL    | 0.24802  | Consensus (ann/smm)                    | 0.43 | 98.53% (470/477) | Non-Toxin |  |
| 479 | M Protein | A*24:02 | 9  | LWLLWPVTL    | 0.24802  | Consensus (ann/smm)                    | 0.43 | 98.53% (470/477) | Non-Toxin |  |
| 480 | M Protein | A*24:02 | 9  | LWPVTLACF    | 0.06682  | Consensus (ann/smm)                    | 0.2  | 98.74% (471/477) | Non-Toxin |  |
| 481 | M Protein | A*23:01 | 10 | LYIIKLIFLW   | 0.17392  | Consensus (ann/smm)                    | 0.17 | 98.53% (470/477) | Non-Toxin |  |
| 482 | M Protein | A*24:02 | 10 | LYIIKLIFLW   | 0.17392  | Consensus (ann/smm)                    | 0.23 | 98.53% (470/477) | Non-Toxin |  |
| 483 | M Protein | B*57:01 | 9  | MACLVGLMW    | -0.06852 | Consensus (ann/smm)                    | 0.15 | 98.53% (470/477) | Non-Toxin |  |
| 484 | M Protein | B*58:01 | 9  | MACLVGLMW    | -0.06852 | Consensus (ann/comblib_sidney2008/smm) | 0.2  | 98.53% (470/477) | Non-Toxin |  |
| 485 | M Protein | B*53:01 | 9  | MACLVGLMW    | -0.06852 | Consensus (ann/comblib_sidney2008/smm) | 0.2  | 98.53% (470/477) | Non-Toxin |  |
| 486 | M Protein | A*23:01 | 10 | MWLSYFIASF   | 0.00197  | Consensus (ann/smm)                    | 0.11 | 97.69% (466/477) | Non-Toxin |  |
| 487 | M Protein | A*24:02 | 10 | MWLSYFIASF   | 0.00197  | Consensus (ann/smm)                    | 0.13 | 97.69% (466/477) | Non-Toxin |  |
| 488 | M Protein | A*32:01 | 10 | MWLSYFIASF   | 0.00197  | Consensus (ann/smm)                    | 0.46 | 97.69% (466/477) | Non-Toxin |  |
| 489 | M Protein | A*68:01 | 11 | MWLSYFIASFR  | 0.03554  | ann                                    | 0.09 | 97.69% (466/477) | Non-Toxin |  |
| 490 | M Protein | A*33:01 | 11 | MWLSYFIASFR  | 0.03554  | ann                                    | 0.1  | 97.69% (466/477) | Non-Toxin |  |
| 491 | M Protein | A*30:01 | 10 | NRNRFYIIK    | 0.33978  | Consensus (ann/smm)                    | 0.45 | 98.95% (472/477) | Non-Toxin |  |
| 492 | M Protein | A*23:01 | 10 | QWNLVIGFLF   | 0.28076  | Consensus (ann/smm)                    | 0.12 | 99.16% (473/477) | Non-Toxin |  |
| 493 | M Protein | A*24:02 | 10 | QWNLVIGFLF   | 0.28076  | Consensus (ann/smm)                    | 0.14 | 99.16% (473/477) | Non-Toxin |  |
| 494 | M Protein | A*23:01 | 9  | RFLYIIKLI    | 0.05908  | Consensus (ann/smm)                    | 0.47 | 98.74% (471/477) | Non-Toxin |  |
| 495 | M Protein | A*23:01 | 10 | RFLYIIKLIF   | 0.11728  | Consensus (ann/smm)                    | 0.12 | 98.74% (471/477) | Non-Toxin |  |
| 496 | M Protein | A*24:02 | 10 | RFLYIIKLIF   | 0.11728  | Consensus (ann/smm)                    | 0.45 | 98.74% (471/477) | Non-Toxin |  |
| 497 | M Protein | A*31:01 | 9  | RIAGHHLGR    | 0.11919  | Consensus (ann/smm)                    | 0.46 | 99.58% (475/477) | Non-Toxin |  |
| 498 | M Protein | A*32:01 | 11 | RINWITGGIAI  | 0.58827  | ann                                    | 0.33 | 99.37% (474/477) | Non-Toxin |  |
| 499 | M Protein | A*32:01 | 11 | RINWITGGIAI  | 0.58827  | ann                                    | 0.33 | 99.37% (474/477) | Non-Toxin |  |
| 500 | M Protein | B*08:01 | 9  | RLFARTRSM    | 0.11133  | Consensus (ann/comblib_sidney2008/smm) | 0.3  | 99.79% (476/477) | Non-Toxin |  |
| 501 | M Protein | A*32:01 | 9  | RLFARTRSM    | 0.11133  | Consensus (ann/comblib_sidney2008/smm) | 0.4  | 99.79% (476/477) | Non-Toxin |  |
| 502 | M Protein | B*15:01 | 9  | RLFARTRSM    | 0.11133  | Consensus (ann/comblib_sidney2008/smm) | 0.5  | 99.79% (476/477) | Non-Toxin |  |
| 503 | M Protein | A*30:01 | 9  | RNRFLYIIK    | 0.3104   | Consensus (ann/comblib_sidney2008/smm) | 0.2  | 98.95% (472/477) | Non-Toxin |  |
| 504 | M Protein | A*32:01 | 8  | RTRSMWSF     | -0.25178 | ann                                    | 0.1  | 99.58% (475/477) | Non-Toxin |  |
| 505 | M Protein | A*30:01 | 8  | RTRSMWSF     | -0.25178 | ann                                    | 0.29 | 99.58% (475/477) | Non-Toxin |  |
| 506 | M Protein | B*57:01 | 8  | RTRSMWSF     | -0.25178 | ann                                    | 0.39 | 99.58% (475/477) | Non-Toxin |  |
| 507 | M Protein | A*30:01 | 9  | RTRSMWSFN    | -0.18338 | Consensus (ann/comblib_sidney2008/smm) | 0.3  | 99.37% (474/477) | Non-Toxin |  |
| 508 | M Protein | A*30:01 | 8  | RYRIGNYK     | 0.17451  | ann                                    | 0.19 | 98.53% (470/477) | Non-Toxin |  |
| 509 | M Protein | A*23:01 | 9  | RYRIGNYKL    | 0.04851  | Consensus (ann/smm)                    | 0.4  | 98.53% (470/477) | Non-Toxin |  |
| 510 | M Protein | A*30:02 | 9  | SGFAAYSRY    | 0.00261  | Consensus (ann/smm)                    | 0.41 | 98.32% (469/477) | Non-Toxin |  |
| 511 | M Protein | A*31:01 | 10 | SGFAAYSRYR   | -0.00234 | Consensus (ann/smm)                    | 0.35 | 98.32% (469/477) | Non-Toxin |  |
| 512 | M Protein | A*01:01 | 9  | SSDNIALLV    | 0.15128  | Consensus (ann/smm)                    | 0.2  | 99.16% (473/477) | Non-Toxin |  |
| 513 | M Protein | A*33:01 | 8  | SYFIASFR     | 0.15309  | ann                                    | 0.42 | 98.74% (471/477) | Non-Toxin |  |
| 514 | M Protein | A*24:02 | 9  | SYFIASFRL    | 0.18333  | Consensus (ann/smm)                    | 0.22 | 98.74% (471/477) | Non-Toxin |  |
| 515 | M Protein | A*23:01 | 9  | SYFIASFRL    | 0.18333  | Consensus (ann/smm)                    | 0.36 | 98.74% (471/477) | Non-Toxin |  |
| 516 | M Protein | A*23:01 | 10 | SYFIASFRLF   | 0.19632  | Consensus (ann/smm)                    | 0.11 | 98.74% (471/477) | Non-Toxin |  |
| 517 | M Protein | A*24:02 | 10 | SYFIASFRLF   | 0.19632  | Consensus (ann/smm)                    | 0.11 | 98.74% (471/477) | Non-Toxin |  |
| 518 | M Protein | A*33:01 | 10 | SYYKLGASQR   | -0.36647 | Consensus (ann/smm)                    | 0.27 | 99.37% (474/477) | Non-Toxin |  |
| 519 | M Protein | A*02:03 | 9  | TLACFVLA     | 0.12481  | Consensus (ann/smm)                    | 0.42 | 99.16% (473/477) | Non-Toxin |  |
| 520 | M Protein | A*02:03 | 10 | TLACFVLA     | 0.15809  | Consensus (ann/smm)                    | 0.12 | 98.32% (469/477) | Non-Toxin |  |
| 521 | M Protein | A*02:01 | 10 | TLACFVLA     | 0.15809  | Consensus (ann/smm)                    | 0.21 | 98.32% (469/477) | Non-Toxin |  |

| 522   | M Protein | A*30:01 | 9      | TSRTLSYYK   | -0.11595       | Consensus (ann/comblib_sidney2008/smm) | 0.3             | 99.16% (473/477) | Non-Toxin |  |
|-------|-----------|---------|--------|-------------|----------------|----------------------------------------|-----------------|------------------|-----------|--|
| 523   | M Protein | A*11:01 | 9      | TSRTLSYYK   | -0.11595       | Consensus (ann/smm)                    | 0.35            | 99.16% (473/477) | Non-Toxin |  |
| 524   | M Protein | B*15:01 | 10     | TVATSRTLSTY | -0.12842       | Consensus (ann/smm)                    | 0.21            | 98.74% (471/477) | Non-Toxin |  |
| 525   | M Protein | A*26:01 | 10     | TVATSRTLSTY | -0.12842       | Consensus (ann/smm)                    | 0.22            | 98.74% (471/477) | Non-Toxin |  |
| 526   | M Protein | A*01:01 | 10     | VATSRTLSTY  | -0.21789       | Consensus (ann/smm)                    | 0.28            | 98.95% (472/477) | Non-Toxin |  |
| 527   | M Protein | A*30:02 | 10     | VATSRTLSTY  | -0.21789       | Consensus (ann/smm)                    | 0.41            | 98.95% (472/477) | Non-Toxin |  |
| 528   | M Protein | A*11:01 | 11     | VATSRTLSTYK | -0.23748       | Consensus (ann/smm)                    | 0.17            | 98.95% (472/477) | Non-Toxin |  |
| 529   | M Protein | A*01:01 | 9      | WICLLQFAY   | -0.02684       | Consensus (ann/smm)                    | 0.37            | 98.95% (472/477) | Non-Toxin |  |
| 530   | M Protein | B*15:01 | 9      | WLSYFIASF   | 0.11822        | Consensus (ann/comblib_sidney2008/smm) | 0.3             | 97.69% (466/477) | Non-Toxin |  |
| 531   | M Protein | A*32:01 | 9      | WLSYFIASF   | 0.11822        | Consensus (ann/comblib_sidney2008/smm) | 0.5             | 97.69% (466/477) | Non-Toxin |  |
| 532   | M Protein | A*68:01 | 10     | WLSYFIASFR  | 0.15179        | Consensus (ann/smm)                    | 0.21            | 97.69% (466/477) | Non-Toxin |  |
| 533   | M Protein | A*33:01 | 10     | WLSYFIASFR  | 0.15179        | Consensus (ann/smm)                    | 0.23            | 97.69% (466/477) | Non-Toxin |  |
| 534   | M Protein | A*31:01 | 10     | WLSYFIASFR  | 0.15179        | Consensus (ann/smm)                    | 0.4             | 97.69% (466/477) | Non-Toxin |  |
| 535   | M Protein | B*51:01 | 10     | WVPTLACFVL  | 0.15193        | Consensus (ann/smm)                    | 0.34            | 98.95% (472/477) | Non-Toxin |  |
| 536   | M Protein | A*01:01 | 9      | YANRNRFLY   | 0.18472        | Consensus (ann/smm)                    | 0.28            | 99.16% (473/477) | Non-Toxin |  |
| 537   | M Protein | B*35:01 | 9      | YANRNRFLY   | 0.18472        | Consensus (ann/comblib_sidney2008/smm) | 0.4             | 99.16% (473/477) | Non-Toxin |  |
| 538   | M Protein | A*23:01 | 9      | YFIASFRLF   | 0.06887        | Consensus (ann/smm)                    | 0.11            | 99.37% (474/477) | Non-Toxin |  |
| 539   | M Protein | A*24:02 | 9      | YFIASFRLF   | 0.06887        | Consensus (ann/smm)                    | 0.18            | 99.37% (474/477) | Non-Toxin |  |
| 540   | M Protein | A*33:01 | 11     | YFIASFRLFAR | 0.19709        | ann                                    | 0.03            | 99.37% (474/477) | Non-Toxin |  |
| 541   | M Protein | B*58:01 | 9      | YIIKLIFLW   | 0.033          | Consensus (ann/comblib_sidney2008/smm) | 0.3             | 98.53% (470/477) | Non-Toxin |  |
| 542   | M Protein | B*53:01 | 9      | YIIKLIFLW   | 0.033          | Consensus (ann/comblib_sidney2008/smm) | 0.3             | 98.53% (470/477) | Non-Toxin |  |
| 543   | M Protein | B*57:01 | 9      | YIIKLIFLW   | 0.033          | Consensus (ann/smm)                    | 0.48            | 98.53% (470/477) | Non-Toxin |  |
| 544   | M Protein | A*26:01 | 9      | YSRYRIGNY   | 0.21358        | Consensus (ann/smm)                    | 0.4             | 98.53% (470/477) | Non-Toxin |  |
| 545   | M Protein | A*30:02 | 9      | YSRYRIGNY   | 0.21358        | Consensus (ann/smm)                    | 0.49            | 98.53% (470/477) | Non-Toxin |  |
| 546   | M Protein | A*03:01 | 10     | YSRYRIGNYK  | 0.21736        | Consensus (ann/smm)                    | 0.47            | 98.53% (470/477) | Non-Toxin |  |
| 547   | M Protein | A*33:01 | 9      | YYKLGASQR   | -0.21863       | Consensus (ann/smm)                    | 0.27            | 99.37% (474/477) | Non-Toxin |  |
| S.No. | ORF       | Allele  | Length | Peptide     | Immunogenicity | Method used                            | Percentile Rank | Conservancy      | Toxicity  |  |
| 548   | N Protein | B*07:02 | 10     | APRITFGGPS  | 0.35654        | Consensus (ann/smm)                    | 0.39            | 96.79% (482/498) | Non-Toxin |  |
| 549   | N Protein | B*15:01 | 10     | AQFAPSASAF  | -0.17446       | Consensus (ann/smm)                    | 0.16            | 97.59% (486/498) | Non-Toxin |  |
| 550   | N Protein | B*15:01 | 11     | AQFAPSASAFF | -0.11074       | ann                                    | 0.12            | 97.59% (486/498) | Non-Toxin |  |
| 551   | N Protein | A*11:01 | 9      | ASAFFGMSR   | 0.03154        | Consensus (ann/smm)                    | 0.38            | 97.59% (486/498) | Non-Toxin |  |
| 552   | N Protein | A*26:01 | 10     | DLSRWYFY    | 0.2944         | Consensus (ann/smm)                    | 0.31            | 99.60% (496/498) | Non-Toxin |  |
| 553   | N Protein | A*01:01 | 10     | DLSRWYFY    | 0.2944         | Consensus (ann/smm)                    | 0.35            | 99.60% (496/498) | Non-Toxin |  |
| 554   | N Protein | A*26:01 | 9      | ELIRQGTDY   | 0.0601         | Consensus (ann/smm)                    | 0.39            | 97.39% (485/498) | Non-Toxin |  |
| 555   | N Protein | B*35:01 | 9      | FAPSASAFF   | -0.18628       | Consensus (ann/comblib_sidney2008/smm) | 0.4             | 97.59% (486/498) | Non-Toxin |  |
| 556   | N Protein | A*68:01 | 9      | FTALTOHGK   | -0.0226        | Consensus (ann/smm)                    | 0.18            | 99.40% (495/498) | Non-Toxin |  |
| 557   | N Protein | A*02:03 | 9      | GMSRIGMEV   | 0.07018        | Consensus (ann/smm)                    | 0.46            | 97.59% (486/498) | Non-Toxin |  |
| 558   | N Protein | A*31:01 | 9      | GYRRATRR    | 0.20111        | Consensus (ann/smm)                    | 0.45            | 99.40% (495/498) | Non-Toxin |  |
| 559   | N Protein | B*15:01 | 11     | IAQFAPSASAF | -0.13353       | ann                                    | 0.4             | 97.39% (485/498) | Non-Toxin |  |
| 560   | N Protein | A*31:01 | 9      | IGYRRATR    | 0.1499         | Consensus (ann/smm)                    | 0.38            | 99.40% (495/498) | Non-Toxin |  |
| 561   | N Protein | A*32:01 | 9      | KAYNVQAF    | -0.00587       | Consensus (ann/comblib_sidney2008/smm) | 0.2             | 97.59% (486/498) | Non-Toxin |  |
| 562   | N Protein | B*58:01 | 9      | KAYNVQAF    | -0.00587       | Consensus (ann/comblib_sidney2008/smm) | 0.4             | 97.59% (486/498) | Non-Toxin |  |
| 563   | N Protein | A*30:02 | 10     | KDLSRWYFY   | 0.14332        | Consensus (ann/smm)                    | 0.47            | 99.60% (496/498) | Non-Toxin |  |
| 564   | N Protein | A*31:01 | 8      | KMKDLSR     | -0.22357       | ann                                    | 0.15            | 99.60% (496/498) | Non-Toxin |  |
| 565   | N Protein | A*30:02 | 10     | KMKDLSRWY   | -0.05692       | Consensus (ann/smm)                    | 0.33            | 99.60% (496/498) | Non-Toxin |  |
| 566   | N Protein | B*07:02 | 9      | KPRQKRTAT   | -0.20542       | Consensus (ann/comblib_sidney2008/smm) | 0.1             | 97.79% (487/498) | Non-Toxin |  |
| 567   | N Protein | B*07:02 | 10     | KPRQKRTATK  | -0.16712       | Consensus (ann/smm)                    | 0.2             | 97.79% (487/498) | Non-Toxin |  |
| 568   | N Protein | A*03:01 | 9      | KSAAEASKK   | -0.07922       | Consensus (ann/smm)                    | 0.45            | 97.79% (487/498) | Non-Toxin |  |
| 569   | N Protein | A*11:01 | 9      | KTFPPTPEK   | 0.1306         | Consensus (ann/smm)                    | 0.11            | 96.99% (483/498) | Non-Toxin |  |
| 570   | N Protein | A*30:01 | 9      | KTFPPTPEK   | 0.1306         | Consensus (ann/comblib_sidney2008/smm) | 0.2             | 96.99% (483/498) | Non-Toxin |  |
| 571   | N Protein | A*03:01 | 9      | KTFPPTPEK   | 0.1306         | Consensus (ann/smm)                    | 0.23            | 96.99% (483/498) | Non-Toxin |  |

| 572   | N Protein | A*11:01 | 10     | KTFPPTPEKK  | 0.01273        | Consensus (ann/smm)                    | 0.28            | 96.99% (483/498)  | Non-Toxin |  |
|-------|-----------|---------|--------|-------------|----------------|----------------------------------------|-----------------|-------------------|-----------|--|
| 573   | N Protein | B*08:01 | 9      | LLLDRLNQL   | -0.01446       | Consensus (ann/comblib_sidney2008/smm) | 0.4             | 97.59% (486/498)  | Non-Toxin |  |
| 574   | N Protein | B*15:01 | 9      | LLNKHIDAY   | -0.02074       | Consensus (ann/comblib_sidney2008/smm) | 0.3             | 97.59% (486/498)  | Non-Toxin |  |
| 575   | N Protein | A*03:01 | 10     | LLNKHIDAYK  | -0.00626       | Consensus (ann/smm)                    | 0.43            | 97.59% (486/498)  | Non-Toxin |  |
| 576   | N Protein | B*35:01 | 9      | LPAADLDDF   | 0.09491        | Consensus (ann/comblib_sidney2008/smm) | 0.5             | 97.59% (486/498)  | Non-Toxin |  |
| 577   | N Protein | B*53:01 | 9      | LPNNTASWF   | 0.05582        | Consensus (ann/comblib_sidney2008/smm) | 0.3             | 99.40% (495/498)  | Non-Toxin |  |
| 578   | N Protein | B*51:01 | 10     | LPYGANKDGI  | -0.09978       | Consensus (ann/smm)                    | 0.23            | 99.20% (494/498)  | Non-Toxin |  |
| 579   | N Protein | A*01:01 | 9      | LSPRWYFY    | 0.35734        | Consensus (ann/smm)                    | 0.22            | 99.60% (496/498)  | Non-Toxin |  |
| 580   | N Protein | B*44:02 | 9      | MEVTPSGTW   | -0.06279       | Consensus (ann/smm)                    | 0.06            | 97.39% (485/498)  | Non-Toxin |  |
| 581   | N Protein | B*44:03 | 9      | MEVTPSGTW   | -0.06279       | Consensus (ann/smm)                    | 0.13            | 97.39% (485/498)  | Non-Toxin |  |
| 582   | N Protein | B*40:01 | 10     | MEVTPSGTWL  | 0.07464        | Consensus (ann/smm)                    | 0.2             | 97.39% (485/498)  | Non-Toxin |  |
| 583   | N Protein | A*01:01 | 11     | NSSPDDQIGYY | 0.01726        | Consensus (ann/smm)                    | 0.49            | 99.40% (495/498)  | Non-Toxin |  |
| 584   | N Protein | A*68:02 | 9      | NTASWFTAL   | 0.22775        | Consensus (ann/comblib_sidney2008/smm) | 0.4             | 99.60% (496/498)  | Non-Toxin |  |
| 585   | N Protein | A*68:02 | 10     | NTASWFTALT  | 0.23901        | Consensus (ann/smm)                    | 0.48            | 99.40% (495/498)  | Non-Toxin |  |
| 586   | N Protein | B*44:03 | 10     | QELIRQGTDY  | 0.14554        | Consensus (ann/smm)                    | 0.25            | 97.19% (484/498)  | Non-Toxin |  |
| 587   | N Protein | B*44:02 | 10     | QELIRQGTDY  | 0.14554        | Consensus (ann/smm)                    | 0.28            | 97.19% (484/498)  | Non-Toxin |  |
| 588   | N Protein | B*07:02 | 10     | RPQGLPNNTA  | -0.01397       | Consensus (ann/smm)                    | 0.46            | 99.40% (495/498)  | Non-Toxin |  |
| 589   | N Protein | B*15:01 | 10     | RQKRTATKAY  | -0.06462       | Consensus (ann/smm)                    | 0.2             | 97.79% (487/498)  | Non-Toxin |  |
| 590   | N Protein | A*30:02 | 10     | RQKRTATKAY  | -0.06462       | Consensus (ann/smm)                    | 0.28            | 97.79% (487/498)  | Non-Toxin |  |
| 591   | N Protein | A*30:01 | 9      | RSKQRRPQG   | -0.16448       | Consensus (ann/comblib_sidney2008/smm) | 0.4             | 99.60% (496/498)  | Non-Toxin |  |
| 592   | N Protein | A*30:01 | 9      | RSRNSSRNS   | -0.26664       | Consensus (ann/comblib_sidney2008/smm) | 0.4             | 93.37% (465/498)  | Non-Toxin |  |
| 593   | N Protein | A*68:01 | 10     | SASAFFGMSR  | 0.00071        | Consensus (ann/smm)                    | 0.31            | 97.59% (486/498)  | Non-Toxin |  |
| 594   | N Protein | A*11:01 | 10     | SASAFFGMSR  | 0.00071        | Consensus (ann/smm)                    | 0.47            | 97.59% (486/498)  | Non-Toxin |  |
| 595   | N Protein | B*07:02 | 9      | SPRWYFYLL   | 0.34101        | Consensus (ann/comblib_sidney2008/smm) | 0.2             | 99.60% (496/498)  | Non-Toxin |  |
| 596   | N Protein | B*08:01 | 9      | SPRWYFYLL   | 0.34101        | Consensus (ann/comblib_sidney2008/smm) | 0.2             | 99.60% (496/498)  | Non-Toxin |  |
| 597   | N Protein | A*01:01 | 10     | SSPDDQIGYY  | 0.07924        | Consensus (ann/smm)                    | 0.2             | 99.40% (495/498)  | Non-Toxin |  |
| 598   | N Protein | A*30:02 | 10     | SSPDDQIGYY  | 0.07924        | Consensus (ann/smm)                    | 0.42            | 99.40% (495/498)  | Non-Toxin |  |
| 599   | N Protein | B*35:01 | 9      | TPSGTWLTY   | 0.24003        | Consensus (ann/comblib_sidney2008/smm) | 0.2             | 97.39% (485/498)  | Non-Toxin |  |
| 600   | N Protein | B*53:01 | 9      | TPSGTWLTY   | 0.24003        | Consensus (ann/comblib_sidney2008/smm) | 0.3             | 97.39% (485/498)  | Non-Toxin |  |
| 601   | N Protein | B*53:01 | 10     | YGANKDGIW   | 0.03977        | Consensus (ann/smm)                    | 0.24            | 99.40% (495/498)  | Non-Toxin |  |
| 602   | N Protein | A*24:02 | 9      | YYRRATRRRI  | 0.21744        | Consensus (ann/smm)                    | 0.26            | 99.40% (495/498)  | Non-Toxin |  |
| 603   | N Protein | A*33:01 | 10     | YYRRATRRIR  | 0.31494        | Consensus (ann/smm)                    | 0.32            | 99.40% (495/498)  | Non-Toxin |  |
| S.No. | ORF       | Allele  | Length | Peptide     | Immunogenicity | Method used                            | Percentile Rank | Conservancy       | Toxicity  |  |
| 604   | ORF10     | A*02:06 | 10     | FAFPFTIYSL  | 0.20414        | Consensus (ann/smm)                    | 0.48            | 99.79% (478/479)  | Non-Toxin |  |
| 605   | ORF10     | B*51:01 | 8      | FPFTIYSL    | 0.06356        | Consensus (ann/smm)                    | 0.39            | 100.00% (479/479) | Non-Toxin |  |
| 606   | ORF10     | B*51:01 | 9      | FPFTIYSLL   | 0.05708        | Consensus (ann/comblib_sidney2008/smm) | 0.3             | 100.00% (479/479) | Non-Toxin |  |
| 607   | ORF10     | B*53:01 | 9      | FPFTIYSLL   | 0.05708        | Consensus (ann/comblib_sidney2008/smm) | 0.5             | 100.00% (479/479) | Non-Toxin |  |
| 608   | ORF10     | B*53:01 | 10     | FPFTIYSLLL  | 0.03149        | Consensus (ann/smm)                    | 0.13            | 100.00% (479/479) | Non-Toxin |  |
| 609   | ORF10     | B*51:01 | 10     | FPFTIYSLLL  | 0.03149        | Consensus (ann/smm)                    | 0.14            | 100.00% (479/479) | Non-Toxin |  |
| 610   | ORF10     | A*68:01 | 10     | FTIYSLLLCR  | -0.18372       | Consensus (ann/smm)                    | 0.12            | 100.00% (479/479) | Non-Toxin |  |
| 611   | ORF10     | A*33:01 | 10     | FTIYSLLLCR  | -0.18372       | Consensus (ann/smm)                    | 0.35            | 100.00% (479/479) | Non-Toxin |  |
| 612   | ORF10     | A*23:01 | 10     | GYINVFAPPF  | 0.32004        | Consensus (ann/smm)                    | 0.11            | 99.37% (476/479)  | Non-Toxin |  |
| 613   | ORF10     | A*24:02 | 10     | GYINVFAPPF  | 0.32004        | Consensus (ann/smm)                    | 0.13            | 99.37% (476/479)  | Non-Toxin |  |
| 614   | ORF10     | B*35:01 | 9      | MGYINVFAP   | 0.28694        | Consensus (ann/comblib_sidney2008/smm) | 0.1             | 99.37% (476/479)  | Non-Toxin |  |
| 615   | ORF10     | A*23:01 | 9      | MGYINVFAP   | 0.28694        | Consensus (ann/smm)                    | 0.5             | 99.37% (476/479)  | Non-Toxin |  |
| 616   | ORF10     | A*23:01 | 11     | MGYINVFAPPF | 0.40977        | Consensus (ann/smm)                    | 0.41            | 99.37% (476/479)  | Non-Toxin |  |
| 617   | ORF10     | A*68:02 | 9      | NVFAFPFTI   | 0.30241        | Consensus (ann/comblib_sidney2008/smm) | 0.4             | 99.58% (477/479)  | Non-Toxin |  |
| 618   | ORF10     | A*32:01 | 9      | NVFAFPFTI   | 0.30241        | Consensus (ann/comblib_sidney2008/smm) | 0.5             | 99.58% (477/479)  | Non-Toxin |  |
| 619   | ORF10     | A*26:01 | 10     | NVFAFPFTIY  | 0.40129        | Consensus (ann/smm)                    | 0.48            | 99.58% (477/479)  | Non-Toxin |  |
| 620   | ORF10     | A*68:01 | 9      | TIYSLLLCR   | -0.22977       | Consensus (ann/smm)                    | 0.47            | 100.00% (479/479) | Non-Toxin |  |
| 621   | ORF10     | B*53:01 | 9      | YINVFAPPF   | 0.28259        | Consensus (ann/comblib_sidney2008/smm) | 0.35            | 99.37% (476/479)  | Non-Toxin |  |

| S.No. | ORF     | Allele  | Length | Peptide     | Immunogenicity | Method used                            | Percentile Rank | Conservancy     | Toxicity  | NSP   |
|-------|---------|---------|--------|-------------|----------------|----------------------------------------|-----------------|-----------------|-----------|-------|
| 622   | ORF10   | A*32:01 | 9      | YINVFAFPF   | 0.28259        | Consensus (ann/comblib_sidney2008/smm) | 0.4             | 99.37%(476/479) | Non-Toxin |       |
| 623   | ORF-1ab | A*30:02 | 10     | ASFYYVWKS   | 0.00073        | Consensus (ann/smm)                    | 0.07            | 99.77%(452/453) | Non-Toxin | nsp3  |
| 624   | ORF-1ab | A*30:02 | 10     | CANGQVFGLY  | 0.09172        | Consensus (ann/smm)                    | 0.1             | 99.55%(451/453) | Non-Toxin | nsp13 |
| 625   | ORF-1ab | A*30:02 | 10     | CANGQVFGLY  | 0.09172        | Consensus (ann/smm)                    | 0.1             | 99.55%(451/453) | Non-Toxin | nsp13 |
| 626   | ORF-1ab | A*33:01 | 11     | CLAYFMRFR   | 0.12614        | ann                                    | 0.07            | 100%(453/453)   | Non-Toxin | nsp4  |
| 627   | ORF-1ab | A*01:01 | 9      | CTDDNALAY   | 0.07355        | Consensus (ann/smm)                    | 0.06            | 99.77%(452/453) | Non-Toxin | nsp9  |
| 628   | ORF-1ab | A*01:01 | 10     | CTDDNALAY   | 0.08174        | Consensus (ann/smm)                    | 0.06            | 99.77%(452/453) | Non-Toxin | nsp9  |
| 629   | ORF-1ab | B*44:03 | 9      | DEWSMATYY   | -0.19814       | Consensus (ann/smm)                    | 0.07            | 99.55%(451/453) | Non-Toxin | nsp3  |
| 630   | ORF-1ab | A*26:01 | 9      | ETISLAGSY   | -0.1653        | Consensus (ann/smm)                    | 0.1             | 100%(453/453)   | Non-Toxin | nsp3  |
| 631   | ORF-1ab | A*68:01 | 10     | ETISLAGSYK  | -0.20585       | Consensus (ann/smm)                    | 0.06            | 100%(453/453)   | Non-Toxin | nsp3  |
| 632   | ORF-1ab | B*35:01 | 9      | FAVDAAKAY   | -0.04849       | Consensus (ann/comblib_sidney2008/smm) | 0.1             | 98.89%(448/453) | Non-Toxin | nsp10 |
| 633   | ORF-1ab | A*02:01 | 10     | FLFVAIFYL   | 0.37766        | Consensus (ann/smm)                    | 0.06            | 99.77%(452/453) | Non-Toxin | nsp4  |
| 634   | ORF-1ab | A*02:03 | 9      | FLNGSCGSV   | -0.24791       | Consensus (ann/smm)                    | 0.06            | 99.55%(451/453) | Non-Toxin | nsp5  |
| 635   | ORF-1ab | B*53:01 | 10     | FPLCANGQVF  | -0.06779       | Consensus (ann/smm)                    | 0.1             | 99.55%(451/453) | Non-Toxin | nsp13 |
| 636   | ORF-1ab | B*53:01 | 10     | FPLCANGQVF  | -0.06779       | Consensus (ann/smm)                    | 0.1             | 99.55%(451/453) | Non-Toxin | nsp13 |
| 637   | ORF-1ab | A*33:01 | 11     | FYWFSSNYLKR | -0.00254       | ann                                    | 0.04            | 98.67%(447/453) | Non-Toxin | nsp4  |
| 638   | ORF-1ab | B*53:01 | 10     | IPLMYKGLPW  | -0.37784       | Consensus (ann/smm)                    | 0.07            | 100%(453/453)   | Non-Toxin | nsp14 |
| 639   | ORF-1ab | B*53:01 | 10     | IPLMYKGLPW  | -0.37784       | Consensus (ann/smm)                    | 0.07            | 100%(453/453)   | Non-Toxin | nsp14 |
| 640   | ORF-1ab | B*07:02 | 9      | IPRRNVATL   | 0.15714        | Consensus (ann/comblib_sidney2008/smm) | 0.1             | 100%(453/453)   | Non-Toxin | nsp13 |
| 641   | ORF-1ab | B*07:02 | 9      | IPRRNVATL   | 0.15714        | Consensus (ann/comblib_sidney2008/smm) | 0.1             | 100%(453/453)   | Non-Toxin | nsp13 |
| 642   | ORF-1ab | B*58:01 | 8      | ISNSWLMW    | -0.11151       | ann                                    | 0.05            | 100%(453/453)   | Non-Toxin | nsp3  |
| 643   | ORF-1ab | A*30:02 | 9      | KMNYQVNGY   | -0.06542       | Consensus (ann/smm)                    | 0.07            | 100%(453/453)   | Non-Toxin | nsp14 |
| 644   | ORF-1ab | A*30:02 | 9      | KMNYQVNGY   | -0.06542       | Consensus (ann/smm)                    | 0.07            | 100%(453/453)   | Non-Toxin | nsp14 |
| 645   | ORF-1ab | A*30:01 | 9      | KVKLYFIK    | 0.08856        | Consensus (ann/comblib_sidney2008/smm) | 0.1             | 100%(453/453)   | Non-Toxin | nsp9  |
| 646   | ORF-1ab | B*15:01 | 9      | LMNVLTLVY   | 0.07994        | Consensus (ann/comblib_sidney2008/smm) | 0.1             | 98.01%(444/453) | Non-Toxin | nsp6  |
| 647   | ORF-1ab | B*35:01 | 9      | LPSLATVAY   | 0.06748        | Consensus (ann/comblib_sidney2008/smm) | 0.1             | 98.01%(444/453) | Non-Toxin | nsp6  |
| 648   | ORF-1ab | B*53:01 | 10     | LPNVAFELW   | 0.27341        | Consensus (ann/smm)                    | 0.06            | 100%(453/453)   | Non-Toxin | nsp15 |
| 649   | ORF-1ab | A*33:01 | 11     | MYKGLPWNVVR | 0.21107        | ann                                    | 0.06            | 100%(453/453)   | Non-Toxin | nsp14 |
| 650   | ORF-1ab | A*33:01 | 11     | MYKGLPWNVVR | 0.21107        | ann                                    | 0.06            | 100%(453/453)   | Non-Toxin | nsp14 |
| 651   | ORF-1ab | B*44:02 | 9      | QEILGTVSW   | 0.03976        | Consensus (ann/smm)                    | 0.06            | 100%(453/453)   | Non-Toxin | nsp3  |
| 652   | ORF-1ab | A*32:01 | 9      | RMYIFFASF   | 0.29328        | Consensus (ann/comblib_sidney2008/smm) | 0.1             | 99.11%(449/453) | Non-Toxin | nsp3  |
| 653   | ORF-1ab | B*15:01 | 9      | RMYIFFASF   | 0.29328        | Consensus (ann/comblib_sidney2008/smm) | 0.1             | 99.11%(449/453) | Non-Toxin | nsp3  |
| 654   | ORF-1ab | A*30:02 | 10     | RMYIFFASFY  | 0.32633        | Consensus (ann/smm)                    | 0.06            | 99.11%(449/453) | Non-Toxin | nsp3  |
| 655   | ORF-1ab | A*03:01 | 10     | RMYIFFASFY  | 0.32633        | Consensus (ann/smm)                    | 0.1             | 99.11%(449/453) | Non-Toxin | nsp3  |
| 656   | ORF-1ab | A*30:02 | 10     | RYFRLTLGVY  | 0.15936        | Consensus (ann/smm)                    | 0.06            | 100%(453/453)   | Non-Toxin | nsp6  |
| 657   | ORF-1ab | B*44:02 | 11     | SEMVMCGGSLY | -0.32016       | ann                                    | 0.03            | 100%(453/453)   | Non-Toxin | nsp12 |
| 658   | ORF-1ab | A*11:01 | 10     | SIINNTVYTK  | 0.12661        | Consensus (ann/smm)                    | 0.06            | 100%(453/453)   | Non-Toxin | nsp15 |
| 659   | ORF-1ab | A*11:01 | 9      | STFNVPMEK   | -0.02845       | Consensus (ann/smm)                    | 0.06            | 99.77%(452/453) | Non-Toxin | nsp3  |
| 660   | ORF-1ab | A*30:02 | 9      | STNVTIATY   | 0.25822        | Consensus (ann/smm)                    | 0.09            | 99.33%(450/453) | Non-Toxin | nsp3  |
| 661   | ORF-1ab | A*32:01 | 8      | TYNLWNTF    | 0.22911        | ann                                    | 0.1             | 98.67%(447/453) | Non-Toxin | nsp14 |
| 662   | ORF-1ab | B*35:01 | 9      | VPFWITIA    | 0.56221        | Consensus (ann/comblib_sidney2008/smm) | 0.1             | 100%(453/453)   | Non-Toxin | nsp4  |
| 663   | ORF-1ab | B*08:01 | 10     | YAYLRKHFSM  | -0.13937       | Consensus (ann/smm)                    | 0.07            | 100%(453/453)   | Non-Toxin | nsp12 |
| 664   | ORF-1ab | A*02:06 | 10     | YIFFASFYV   | 0.13772        | Consensus (ann/smm)                    | 0.07            | 99.55%(451/453) | Non-Toxin | nsp3  |
| 665   | ORF-1ab | A*02:06 | 10     | YILFTRFFYV  | 0.40924        | Consensus (ann/smm)                    | 0.07            | 100%(453/453)   | Non-Toxin | nsp3  |
| 666   | ORF-1ab | B*53:01 | 10     | YVMHANYIFW  | 0.18459        | Consensus (ann/smm)                    | 0.1             | 98.89%(448/453) | Non-Toxin | nsp16 |
| 667   | ORF-1ab | A*33:01 | 8      | YYFMRFR     | 0.06558        | ann                                    | 0.1             | 100%(453/453)   | Non-Toxin | nsp4  |
| S.No. | ORF     | Allele  | Length | Peptide     | Immunogenicity | Method used                            | Percentile Rank | Conservancy     | Toxicity  | NSP   |
| 668   | ORF3a   | B*44:02 | 11     | AGLEAPFLYLY | 0.21841        | ann                                    | 0.41            | 96.67%(465/481) | Non-Toxin |       |
| 669   | ORF3a   | A*02:03 | 9      | ALSKGVHFV   | -0.10314       | Consensus (ann/smm)                    | 0.12            | 99.67%(477/481) | Non-Toxin |       |
| 670   | ORF3a   | A*02:01 | 9      | ALSKGVHFV   | -0.10314       | Consensus (ann/comblib_sidney2008/smm) | 0.4             | 99.67%(477/481) | Non-Toxin |       |



|     |       |         |    |             |          |                                        |      |                 |           |  |
|-----|-------|---------|----|-------------|----------|----------------------------------------|------|-----------------|-----------|--|
| 671 | ORF3a | B*07:02 | 9  | APFLYLYAL   | 0.03254  | Consensus (ann/comblib_sidney2008/smm) | 0.5  | 96.88%(466/481) | Non-Toxin |  |
| 672 | ORF3a | A*30:01 | 9  | ASKIITLKK   | 0.0947   | Consensus (ann/comblib_sidney2008/smm) | 0.4  | 99.37%(478/481) | Non-Toxin |  |
| 673 | ORF3a | A*11:01 | 9  | ASKIITLKK   | 0.0947   | Consensus (ann/smm)                    | 0.46 | 99.37%(478/481) | Non-Toxin |  |
| 674 | ORF3a | B*58:01 | 9  | ASLPFGWLI   | 0.3116   | Consensus (ann/comblib_sidney2008/smm) | 0.3  | 98.96%(476/481) | Non-Toxin |  |
| 675 | ORF3a | A*30:02 | 9  | CWHTNICYDY  | 0.00235  | Consensus (ann/smm)                    | 0.38 | 97.29%(468/481) | Non-Toxin |  |
| 676 | ORF3a | A*68:01 | 9  | DATPSDFVR   | -0.01586 | Consensus (ann/smm)                    | 0.21 | 99.58%(479/481) | Non-Toxin |  |
| 677 | ORF3a | A*26:01 | 10 | DTGVEHVTFE  | 0.32156  | Consensus (ann/smm)                    | 0.41 | 99.58%(479/481) | Non-Toxin |  |
| 678 | ORF3a | A*26:01 | 10 | EIKDATPSDF  | -0.10888 | Consensus (ann/smm)                    | 0.28 | 99.58%(479/481) | Non-Toxin |  |
| 679 | ORF3a | A*01:01 | 9  | FLCWHTNCY   | 0.23647  | Consensus (ann/smm)                    | 0.42 | 97.29%(468/481) | Non-Toxin |  |
| 680 | ORF3a | A*68:01 | 9  | FLQSINFVR   | 0.04236  | Consensus (ann/smm)                    | 0.23 | 97.08%(467/481) | Non-Toxin |  |
| 681 | ORF3a | A*33:01 | 9  | FLQSINFVR   | 0.04236  | Consensus (ann/smm)                    | 0.39 | 97.08%(467/481) | Non-Toxin |  |
| 682 | ORF3a | B*15:01 | 9  | FLYLYALVY   | 0.03563  | Consensus (ann/comblib_sidney2008/smm) | 0.42 | 96.88%(466/481) | Non-Toxin |  |
| 683 | ORF3a | A*01:01 | 9  | FLYLYALVY   | 0.03563  | Consensus (ann/smm)                    | 0.45 | 96.88%(466/481) | Non-Toxin |  |
| 684 | ORF3a | A*23:01 | 10 | FLYLYALVYF  | 0.04438  | Consensus (ann/smm)                    | 0.27 | 96.88%(466/481) | Non-Toxin |  |
| 685 | ORF3a | A*02:03 | 10 | FMRIFTIGTV  | 0.47908  | Consensus (ann/smm)                    | 0.17 | 99.37%(478/481) | Non-Toxin |  |
| 686 | ORF3a | A*68:01 | 9  | FTIGTVTLK   | 0.18024  | Consensus (ann/smm)                    | 0.16 | 99.37%(478/481) | Non-Toxin |  |
| 687 | ORF3a | A*11:01 | 9  | FTIGTVTLK   | 0.18024  | Consensus (ann/smm)                    | 0.37 | 99.37%(478/481) | Non-Toxin |  |
| 688 | ORF3a | A*26:01 | 9  | FVCNLLLLF   | -0.06109 | Consensus (ann/smm)                    | 0.36 | 97.92%(471/481) | Non-Toxin |  |
| 689 | ORF3a | A*02:06 | 10 | FVCNLLLLFV  | 0.00299  | Consensus (ann/smm)                    | 0.21 | 97.50%(469/481) | Non-Toxin |  |
| 690 | ORF3a | A*02:01 | 10 | FVCNLLLLFV  | 0.00299  | Consensus (ann/smm)                    | 0.42 | 97.50%(469/481) | Non-Toxin |  |
| 691 | ORF3a | B*57:01 | 9  | FVRIIMRLW   | 0.15222  | Consensus (ann/smm)                    | 0.27 | 96.67%(465/481) | Non-Toxin |  |
| 692 | ORF3a | A*01:01 | 10 | GLEAPFLYLY  | 0.15503  | Consensus (ann/smm)                    | 0.43 | 97.08%(467/481) | Non-Toxin |  |
| 693 | ORF3a | A*23:01 | 9  | HFVCNLLLL   | -0.07343 | Consensus (ann/smm)                    | 0.48 | 97.92%(471/481) | Non-Toxin |  |
| 694 | ORF3a | A*23:01 | 10 | HFVCNLLLLF  | -0.08423 | Consensus (ann/smm)                    | 0.28 | 97.92%(471/481) | Non-Toxin |  |
| 695 | ORF3a | A*26:01 | 9  | HTIDGSSGV   | -0.17703 | Consensus (ann/smm)                    | 0.23 | 95.42%(459/481) | Non-Toxin |  |
| 696 | ORF3a | A*68:02 | 9  | HTIDGSSGV   | -0.17703 | Consensus (ann/comblib_sidney2008/smm) | 0.3  | 95.42%(459/481) | Non-Toxin |  |
| 697 | ORF3a | A*68:01 | 9  | HVTFEYFNK   | 0.36278  | Consensus (ann/smm)                    | 0.16 | 99.79%(480/481) | Non-Toxin |  |
| 698 | ORF3a | A*11:01 | 9  | HVTFEYFNK   | 0.36278  | Consensus (ann/smm)                    | 0.24 | 99.79%(480/481) | Non-Toxin |  |
| 699 | ORF3a | A*30:01 | 9  | HVTFEYFNK   | 0.36278  | Consensus (ann/comblib_sidney2008/smm) | 0.34 | 99.79%(480/481) | Non-Toxin |  |
| 700 | ORF3a | B*58:01 | 9  | IIMRLWLCW   | 0.15193  | Consensus (ann/comblib_sidney2008/smm) | 0.3  | 96.67%(465/481) | Non-Toxin |  |
| 701 | ORF3a | B*57:01 | 9  | IIMRLWLCW   | 0.15193  | Consensus (ann/smm)                    | 0.49 | 96.67%(465/481) | Non-Toxin |  |
| 702 | ORF3a | A*03:01 | 10 | IIMRLWLCWK  | 0.27346  | Consensus (ann/smm)                    | 0.13 | 96.67%(465/481) | Non-Toxin |  |
| 703 | ORF3a | A*11:01 | 10 | IIMRLWLCWK  | 0.27346  | Consensus (ann/smm)                    | 0.36 | 96.67%(465/481) | Non-Toxin |  |
| 704 | ORF3a | A*03:01 | 9  | IMRLWLCWK   | 0.29482  | Consensus (ann/smm)                    | 0.34 | 96.67%(465/481) | Non-Toxin |  |
| 705 | ORF3a | A*31:01 | 11 | IMRLWLCWKCR | 0.15305  | Consensus (ann/smm)                    | 0.41 | 96.67%(465/481) | Non-Toxin |  |
| 706 | ORF3a | A*33:01 | 11 | IMRLWLCWKCR | 0.15305  | ann                                    | 0.46 | 96.67%(465/481) | Non-Toxin |  |
| 707 | ORF3a | A*33:01 | 9  | INFVRIIMR   | 0.26494  | Consensus (ann/smm)                    | 0.41 | 96.88%(466/481) | Non-Toxin |  |
| 708 | ORF3a | B*53:01 | 9  | IPIQASLPF   | -0.20683 | Consensus (ann/comblib_sidney2008/smm) | 0.2  | 99.67%(477/481) | Non-Toxin |  |
| 709 | ORF3a | B*35:01 | 9  | IPIQASLPF   | -0.20683 | Consensus (ann/comblib_sidney2008/smm) | 0.2  | 99.67%(477/481) | Non-Toxin |  |
| 710 | ORF3a | B*07:02 | 9  | IPIQASLPF   | -0.20683 | Consensus (ann/comblib_sidney2008/smm) | 0.3  | 99.67%(477/481) | Non-Toxin |  |
| 711 | ORF3a | B*51:01 | 10 | IPYNSVTSSI  | -0.32835 | Consensus (ann/smm)                    | 0.11 | 97.92%(471/481) | Non-Toxin |  |
| 712 | ORF3a | B*07:02 | 10 | IPYNSVTSSI  | -0.32835 | Consensus (ann/smm)                    | 0.46 | 97.92%(471/481) | Non-Toxin |  |
| 713 | ORF3a | B*53:01 | 9  | IQASLPFGW   | -0.05641 | Consensus (ann/comblib_sidney2008/smm) | 0.4  | 98.96%(476/481) | Non-Toxin |  |
| 714 | ORF3a | B*58:01 | 9  | IQASLPFGW   | -0.05641 | Consensus (ann/comblib_sidney2008/smm) | 0.5  | 98.96%(476/481) | Non-Toxin |  |
| 715 | ORF3a | B*15:01 | 10 | IVGVALLAVF  | 0.12654  | Consensus (ann/smm)                    | 0.32 | 99.67%(477/481) | Non-Toxin |  |
| 716 | ORF3a | B*57:01 | 9  | KIITLKKRW   | -0.2833  | Consensus (ann/smm)                    | 0.23 | 99.67%(477/481) | Non-Toxin |  |
| 717 | ORF3a | B*58:01 | 9  | KIITLKKRW   | -0.2833  | Consensus (ann/comblib_sidney2008/smm) | 0.4  | 99.67%(477/481) | Non-Toxin |  |
| 718 | ORF3a | B*44:03 | 9  | LEAPFLYLY   | 0.0955   | Consensus (ann/smm)                    | 0.24 | 97.29%(468/481) | Non-Toxin |  |
| 719 | ORF3a | B*44:02 | 9  | LEAPFLYLY   | 0.0955   | Consensus (ann/smm)                    | 0.4  | 97.29%(468/481) | Non-Toxin |  |
| 720 | ORF3a | B*40:01 | 11 | LEAPFLYLYAL | 0.11044  | ann                                    | 0.49 | 96.88%(466/481) | Non-Toxin |  |
| 721 | ORF3a | A*02:06 | 10 | LIVGVALLAV  | 0.12886  | Consensus (ann/smm)                    | 0.2  | 99.37%(478/481) | Non-Toxin |  |

| 722   | ORF3a | A*03:01 | 10     | LLAVFQSASK  | -0.16393       | Consensus (ann/smm)                    | 0.28            | 77.33%(372/481)  | Non-Toxin |  |
|-------|-------|---------|--------|-------------|----------------|----------------------------------------|-----------------|------------------|-----------|--|
| 723   | ORF3a | B*15:01 | 11     | LLVAAGLEAPF | 0.23386        | ann                                    | 0.28            | 97.08%(467/481)  | Non-Toxin |  |
| 724   | ORF3a | B*51:01 | 10     | LPFGWLIVGV  | 0.45692        | Consensus (ann/smm)                    | 0.22            | 98.96%(476/481)  | Non-Toxin |  |
| 725   | ORF3a | B*15:01 | 10     | LVAAGLEAPF  | 0.19506        | Consensus (ann/smm)                    | 0.27            | 97.08%(467/481)  | Non-Toxin |  |
| 726   | ORF3a | A*23:01 | 9      | LYLYALVYF   | 0.05302        | Consensus (ann/smm)                    | 0.11            | 96.88%(466/481)  | Non-Toxin |  |
| 727   | ORF3a | A*24:02 | 9      | LYLYALVYF   | 0.05302        | Consensus (ann/smm)                    | 0.14            | 96.88%(466/481)  | Non-Toxin |  |
| 728   | ORF3a | A*23:01 | 10     | LYLYALVYFL  | 0.12412        | Consensus (ann/smm)                    | 0.18            | 96.88%(466/481)  | Non-Toxin |  |
| 729   | ORF3a | A*24:02 | 10     | LYLYALVYFL  | 0.12412        | Consensus (ann/smm)                    | 0.35            | 96.88%(466/481)  | Non-Toxin |  |
| 730   | ORF3a | A*32:01 | 11     | MRIFTIGTVTL | 0.45546        | ann                                    | 0.35            | 99.37%(478/481)  | Non-Toxin |  |
| 731   | ORF3a | A*02:06 | 9      | NLLLLFVTY   | 0.14216        | Consensus (ann/smm)                    | 0.49            | 97.50%(469/481)  | Non-Toxin |  |
| 732   | ORF3a | B*58:01 | 8      | QASLPFGW    | 0.06314        | ann                                    | 0.35            | 98.96%(476/481)  | Non-Toxin |  |
| 733   | ORF3a | A*68:01 | 10     | QSASKIITLK  | -0.08261       | Consensus (ann/smm)                    | 0.4             | 77.33%(372/481)  | Non-Toxin |  |
| 734   | ORF3a | A*32:01 | 11     | RIFTIGTVTLK | 0.3426         | ann                                    | 0.36            | 99.37%(478/481)  | Non-Toxin |  |
| 735   | ORF3a | A*31:01 | 9      | RLWLCKWCR   | 0.00325        | Consensus (ann/smm)                    | 0.3             | 96.88%(466/481)  | Non-Toxin |  |
| 736   | ORF3a | A*11:01 | 9      | SASKIITLK   | 0.01046        | Consensus (ann/smm)                    | 0.3             | 99.37%(478/481)  | Non-Toxin |  |
| 737   | ORF3a | A*68:01 | 9      | SASKIITLK   | 0.01046        | Consensus (ann/smm)                    | 0.4             | 99.37%(478/481)  | Non-Toxin |  |
| 738   | ORF3a | A*11:01 | 10     | SASKIITLKK  | -0.11032       | Consensus (ann/smm)                    | 0.35            | 99.37%(478/481)  | Non-Toxin |  |
| 739   | ORF3a | B*44:03 | 10     | SEHDYQIGGY  | 0.0901         | Consensus (ann/smm)                    | 0.19            | 99.58%(479/481)  | Non-Toxin |  |
| 740   | ORF3a | B*44:02 | 10     | SEHDYQIGGY  | 0.0901         | Consensus (ann/smm)                    | 0.38            | 99.58%(479/481)  | Non-Toxin |  |
| 741   | ORF3a | A*68:01 | 10     | SINFRVIIMR  | 0.3413         | Consensus (ann/smm)                    | 0.39            | 96.88%(466/481)  | Non-Toxin |  |
| 742   | ORF3a | A*02:06 | 9      | TQLSTDTGV   | -0.05883       | Consensus (ann/smm)                    | 0.39            | 99.58%(479/481)  | Non-Toxin |  |
| 743   | ORF3a | A*01:01 | 10     | TTSPISEHDY  | 0.03815        | Consensus (ann/smm)                    | 0.22            | 97.92%(471/481)  | Non-Toxin |  |
| 744   | ORF3a | A*02:06 | 9      | TVYSHLLLV   | -0.16245       | Consensus (ann/smm)                    | 0.44            | 97.92%(471/481)  | Non-Toxin |  |
| 745   | ORF3a | B*44:03 | 9      | VEHVTFYIY   | 0.3766         | Consensus (ann/smm)                    | 0.18            | 99.58%(479/481)  | Non-Toxin |  |
| 746   | ORF3a | A*32:01 | 9      | VTFYIYNKI   | 0.15046        | Consensus (ann/comblib_sidney2008/smm) | 0.4             | 99.58%(479/481)  | Non-Toxin |  |
| 747   | ORF3a | A*24:02 | 9      | VYFLQSINF   | -0.13315       | Consensus (ann/smm)                    | 0.23            | 96.88%(466/481)  | Non-Toxin |  |
| 748   | ORF3a | A*23:01 | 9      | VYFLQSINF   | -0.13315       | Consensus (ann/smm)                    | 0.24            | 96.88%(466/481)  | Non-Toxin |  |
| 749   | ORF3a | A*33:01 | 11     | VYFLQSINFVR | -0.00063       | ann                                    | 0.43            | 96.88%(466/481)  | Non-Toxin |  |
| 750   | ORF3a | B*40:01 | 11     | WESGVKDCVVL | -0.15959       | ann                                    | 0.21            | 96.25%(463/481)  | Non-Toxin |  |
| 751   | ORF3a | A*01:01 | 10     | YFLCWHTNCY  | 0.18893        | Consensus (ann/smm)                    | 0.48            | 97.08%(467/481)  | Non-Toxin |  |
| 752   | ORF3a | A*33:01 | 10     | YFLQSINFVR  | -0.03483       | Consensus (ann/smm)                    | 0.2             | 96.88%(466/481)  | Non-Toxin |  |
| 753   | ORF3a | A*02:01 | 9      | YLYALVYFL   | 0.13151        | Consensus (ann/comblib_sidney2008/smm) | 0.1             | 96.88%(466/481)  | Non-Toxin |  |
| 754   | ORF3a | A*02:03 | 9      | YLYALVYFL   | 0.13151        | Consensus (ann/smm)                    | 0.18            | 96.88%(466/481)  | Non-Toxin |  |
| 755   | ORF3a | A*02:06 | 9      | YLYALVYFL   | 0.13151        | Consensus (ann/smm)                    | 0.37            | 96.88%(466/481)  | Non-Toxin |  |
| 756   | ORF3a | A*24:02 | 9      | YYQLYSTQL   | -0.24301       | Consensus (ann/smm)                    | 0.29            | 99.58%(479/481)  | Non-Toxin |  |
| S.No. | ORF   | Allele  | Length | Peptide     | Immunogenicity | Method used                            | Percentile Rank | Conservancy      | Toxicity  |  |
| 757   | ORF6  | B*40:01 | 8      | AEILLIIM    | 0.25884        | Consensus (ann/smm)                    | 0.41            | 99.58% (479/481) | Non-Toxin |  |
| 758   | ORF6  | B*44:02 | 11     | AEILLIIMRTF | 0.1815         | ann                                    | 0.06            | 99.58% (479/481) | Non-Toxin |  |
| 759   | ORF6  | A*02:06 | 9      | FQVTIAEIL   | 0.38115        | Consensus (ann/smm)                    | 0.52            | 99.17% (477/481) | Non-Toxin |  |
| 760   | ORF6  | A*03:01 | 10     | ILLIIMRTFK  | 0.2388         | Consensus (ann/smm)                    | 0.17            | 99.58% (479/481) | Non-Toxin |  |
| 761   | ORF6  | A*32:01 | 9      | IMRTFKVSI   | -0.09496       | Consensus (ann/comblib_sidney2008/smm) | 0.44            | 99.79% (480/481) | Non-Toxin |  |
| 762   | ORF6  | A*30:02 | 9      | KVSIWNLDY   | 0.29343        | Consensus (ann/smm)                    | 0.41            | 99.58% (479/481) | Non-Toxin |  |
| 763   | ORF6  | A*03:01 | 9      | LLIIMRTFK   | 0.156          | Consensus (ann/smm)                    | 0.36            | 99.58% (479/481) | Non-Toxin |  |
| 764   | ORF6  | A*30:02 | 10     | LSKSLTENKY  | -0.24668       | Consensus (ann/smm)                    | 0.48            | 98.75% (475/481) | Non-Toxin |  |
| 765   | ORF6  | B*57:01 | 8      | RTFKVSIW    | -0.18221       | ann                                    | 0.05            | 99.79% (480/481) | Non-Toxin |  |
| 766   | ORF6  | B*58:01 | 8      | RTFKVSIW    | -0.18221       | ann                                    | 0.07            | 99.79% (480/481) | Non-Toxin |  |
| 767   | ORF6  | A*32:01 | 8      | RTFKVSIW    | -0.18221       | ann                                    | 0.44            | 99.79% (480/481) | Non-Toxin |  |
| 768   | ORF6  | A*32:01 | 9      | SIWNLDYII   | 0.15011        | Consensus (ann/comblib_sidney2008/smm) | 0.2             | 99.58% (479/481) | Non-Toxin |  |
| 769   | ORF6  | B*58:01 | 9      | VTIAEILLI   | 0.28951        | Consensus (ann/comblib_sidney2008/smm) | 0.34            | 99.17% (477/481) | Non-Toxin |  |
| S.No. | ORF   | Allele  | Length | Peptide     | Immunogenicity | Method used                            | Percentile Rank | Conservancy      | Toxicity  |  |
| 770   | ORF7a | B*44:02 | 10     | ADNKFALTCF  | -0.07618       | Consensus (ann/smm)                    | 0.36            | 98.75% (474/480) | Non-Toxin |  |

| 771   | ORF7a | A*03:01 | 10     | CVRGTTVLLK  | 0.14952        | Consensus (ann/smm)                    | 0.17            | 99.58% (478/480) | Non-Toxin |  |
|-------|-------|---------|--------|-------------|----------------|----------------------------------------|-----------------|------------------|-----------|--|
| 772   | ORF7a | A*26:01 | 9      | EVQELYSPI   | -0.09723       | Consensus (ann/smm)                    | 0.21            | 98.12% (471/480) | Non-Toxin |  |
| 773   | ORF7a | A*68:02 | 9      | EVQELYSPI   | -0.09723       | Consensus (ann/comblib_sidney2008/smm) | 0.5             | 98.12% (471/480) | Non-Toxin |  |
| 774   | ORF7a | A*26:01 | 10     | EVQELYSPIF  | -0.03858       | Consensus (ann/smm)                    | 0.22            | 98.12% (471/480) | Non-Toxin |  |
| 775   | ORF7a | B*53:01 | 10     | FALTCFSTQF  | -0.09369       | Consensus (ann/smm)                    | 0.22            | 98.75% (474/480) | Non-Toxin |  |
| 776   | ORF7a | A*33:01 | 10     | FITLCFTLKR  | -0.03588       | Consensus (ann/smm)                    | 0.32            | 97.92% (470/480) | Non-Toxin |  |
| 777   | ORF7a | A*68:01 | 10     | FITLCFTLKR  | -0.03588       | Consensus (ann/smm)                    | 0.48            | 97.92% (470/480) | Non-Toxin |  |
| 778   | ORF7a | B*15:01 | 9      | FLIVAAIVF   | 0.29611        | Consensus (ann/comblib_sidney2008/smm) | 0.2             | 98.96% (475/480) | Non-Toxin |  |
| 779   | ORF7a | A*02:01 | 10     | FLIVAAIVFI  | 0.38946        | Consensus (ann/smm)                    | 0.21            | 98.33% (472/480) | Non-Toxin |  |
| 780   | ORF7a | A*32:01 | 9      | GTYEGNSPF   | -0.01964       | Consensus (ann/comblib_sidney2008/smm) | 0.4             | 98.96% (475/480) | Non-Toxin |  |
| 781   | ORF7a | A*23:01 | 10     | IFLIVAAIVF  | 0.38189        | Consensus (ann/smm)                    | 0.34            | 98.33% (472/480) | Non-Toxin |  |
| 782   | ORF7a | B*15:01 | 10     | IFLIVAAIVF  | 0.38189        | Consensus (ann/smm)                    | 0.47            | 98.33% (472/480) | Non-Toxin |  |
| 783   | ORF7a | A*03:01 | 10     | ITLCFTLKRK  | -0.06825       | Consensus (ann/smm)                    | 0.17            | 97.92% (470/480) | Non-Toxin |  |
| 784   | ORF7a | A*11:01 | 10     | ITLCFTLKRK  | -0.06825       | Consensus (ann/smm)                    | 0.33            | 97.92% (470/480) | Non-Toxin |  |
| 785   | ORF7a | A*32:01 | 9      | KIILFLALI   | 0.16214        | Consensus (ann/comblib_sidney2008/smm) | 0.4             | 99.58% (478/480) | Non-Toxin |  |
| 786   | ORF7a | B*08:01 | 9      | MKIILFLAL   | 0.29002        | Consensus (ann/comblib_sidney2008/smm) | 0.5             | 99.58% (478/480) | Non-Toxin |  |
| 787   | ORF7a | B*40:01 | 9      | QELYSPIFL   | 0.00186        | Consensus (ann/smm)                    | 0.19            | 98.33% (472/480) | Non-Toxin |  |
| 788   | ORF7a | B*44:02 | 10     | QELYSPIFLI  | 0.03838        | Consensus (ann/smm)                    | 0.22            | 98.33% (472/480) | Non-Toxin |  |
| 789   | ORF7a | B*44:03 | 10     | QELYSPIFLI  | 0.03838        | Consensus (ann/smm)                    | 0.25            | 98.33% (472/480) | Non-Toxin |  |
| 790   | ORF7a | A*03:01 | 10     | QLRARSVSPK  | -0.16177       | Consensus (ann/smm)                    | 0.16            | 98.33% (472/480) | Non-Toxin |  |
| 791   | ORF7a | A*30:01 | 8      | RARSVSPK    | -0.27456       | ann                                    | 0.11            | 98.33% (472/480) | Non-Toxin |  |
| 792   | ORF7a | A*30:01 | 9      | RARSVSPKL   | -0.40056       | Consensus (ann/comblib_sidney2008/smm) | 0.2             | 98.33% (472/480) | Non-Toxin |  |
| 793   | ORF7a | B*58:01 | 9      | RSVSPKLF    | -0.30783       | Consensus (ann/comblib_sidney2008/smm) | 0.2             | 98.33% (472/480) | Non-Toxin |  |
| 794   | ORF7a | A*31:01 | 10     | RSVSPKLFIR  | -0.20775       | Consensus (ann/smm)                    | 0.31            | 98.33% (472/480) | Non-Toxin |  |
| 795   | ORF7a | B*07:02 | 10     | SPIFLIVAAI  | 0.37454        | Consensus (ann/smm)                    | 0.47            | 98.33% (472/480) | Non-Toxin |  |
| 796   | ORF7a | A*31:01 | 9      | SVSPKLFIR   | -0.10874       | Consensus (ann/smm)                    | 0.45            | 98.33% (472/480) | Non-Toxin |  |
| 797   | ORF7a | A*11:01 | 9      | SVSPKLFIR   | -0.10874       | Consensus (ann/smm)                    | 0.46            | 98.33% (472/480) | Non-Toxin |  |
| 798   | ORF7a | A*01:01 | 10     | TLATCELYHY  | 0.1021         | Consensus (ann/smm)                    | 0.35            | 99.79% (479/480) | Non-Toxin |  |
| 799   | ORF7a | B*40:01 | 11     | TYEGNSPFHPL | 0.01942        | ann                                    | 0.46            | 98.96% (475/480) | Non-Toxin |  |
| 800   | ORF7a | A*23:01 | 9      | VFITLCFTL   | 0.14219        | Consensus (ann/smm)                    | 0.3             | 98.33% (472/480) | Non-Toxin |  |
| 801   | ORF7a | A*24:02 | 9      | VFITLCFTL   | 0.14219        | Consensus (ann/smm)                    | 0.44            | 98.33% (472/480) | Non-Toxin |  |
| 802   | ORF7a | B*40:01 | 10     | YEGNSPFHPL  | -0.03639       | Consensus (ann/smm)                    | 0.28            | 98.96% (475/480) | Non-Toxin |  |
| S.No. | ORF   | Allele  | Length | Peptide     | Immunogenicity | Method used                            | Percentile Rank | Conservancy      | Toxicity  |  |
| 803   | ORF7b | A*02:01 | 10     | CFLAFLFLV   | 0.22085        | Consensus (ann/smm)                    | 0.47            | 98.31% (232/236) | Non-Toxin |  |
| 804   | ORF7b | A*02:06 | 10     | CFLAFLFLV   | 0.22085        | Consensus (ann/smm)                    | 0.48            | 98.31% (232/236) | Non-Toxin |  |
| 805   | ORF7b | A*23:01 | 9      | DFYLCFLAF   | 0.05884        | Consensus (ann/smm)                    | 0.29            | 98.31% (232/236) | Non-Toxin |  |
| 806   | ORF7b | A*33:01 | 10     | DFYLCFLAFL  | 0.14012        | Consensus (ann/smm)                    | 0.4             | 98.31% (232/236) | Non-Toxin |  |
| 807   | ORF7b | A*02:03 | 9      | FLAFLFLV    | 0.20158        | Consensus (ann/smm)                    | 0.07            | 98.31% (232/236) | Non-Toxin |  |
| 808   | ORF7b | A*02:06 | 9      | FLAFLFLV    | 0.20158        | Consensus (ann/smm)                    | 0.08            | 98.31% (232/236) | Non-Toxin |  |
| 809   | ORF7b | A*02:01 | 9      | FLAFLFLV    | 0.20158        | Consensus (ann/comblib_sidney2008/smm) | 0.1             | 98.31% (232/236) | Non-Toxin |  |
| 810   | ORF7b | A*68:02 | 9      | FLAFLFLV    | 0.20158        | Consensus (ann/comblib_sidney2008/smm) | 0.33            | 98.31% (232/236) | Non-Toxin |  |
| 811   | ORF7b | A*02:01 | 10     | FLAFLFLVL   | 0.23386        | Consensus (ann/smm)                    | 0.26            | 98.31% (232/236) | Non-Toxin |  |
| 812   | ORF7b | A*02:01 | 10     | FLLFLVLIML  | 0.14288        | Consensus (ann/smm)                    | 0.3             | 99.58% (235/236) | Non-Toxin |  |
| 813   | ORF7b | A*23:01 | 9      | FYLCFLAFL   | 0.14713        | Consensus (ann/smm)                    | 0.36            | 98.31% (232/236) | Non-Toxin |  |
| 814   | ORF7b | A*24:02 | 9      | FYLCFLAFL   | 0.14713        | Consensus (ann/smm)                    | 0.54            | 98.31% (232/236) | Non-Toxin |  |
| 815   | ORF7b | A*23:01 | 10     | FYLCFLAFL   | 0.1745         | Consensus (ann/smm)                    | 0.13            | 98.31% (232/236) | Non-Toxin |  |
| 816   | ORF7b | A*24:02 | 10     | FYLCFLAFL   | 0.1745         | Consensus (ann/smm)                    | 0.28            | 98.31% (232/236) | Non-Toxin |  |
| 817   | ORF7b | A*23:01 | 10     | IDFYLCFLAF  | 0.09468        | Consensus (ann/smm)                    | 0.36            | 98.31% (232/236) | Non-Toxin |  |
| 818   | ORF7b | B*44:03 | 9      | IELSLIDFY   | 0.03153        | Consensus (ann/smm)                    | 0.19            | 99.58% (235/236) | Non-Toxin |  |
| 819   | ORF7b | B*44:02 | 9      | IELSLIDFY   | 0.03153        | Consensus (ann/smm)                    | 0.42            | 99.58% (235/236) | Non-Toxin |  |
| 820   | ORF7b | A*32:01 | 10     | IMLIIFWFS   | 0.58457        | Consensus (ann/smm)                    | 0.4             | 99.58% (235/236) | Non-Toxin |  |

| 821   | ORF7b | B*08:01 | 10     | IMLIIFWFSL  | 0.58457        | Consensus (ann/smm)                    | 0.41            | 99.58% (235/236)  | Non-Toxin |  |
|-------|-------|---------|--------|-------------|----------------|----------------------------------------|-----------------|-------------------|-----------|--|
| 822   | ORF7b | A*02:01 | 10     | IMLIIFWFSL  | 0.58457        | Consensus (ann/smm)                    | 0.43            | 99.58% (235/236)  | Non-Toxin |  |
| 823   | ORF7b | A*23:01 | 9      | FLVLIMLI    | -0.00226       | Consensus (ann/smm)                    | 0.44            | 99.58% (235/236)  | Non-Toxin |  |
| 824   | ORF7b | B*53:01 | 10     | LVLIMLIIFW  | 0.25452        | Consensus (ann/smm)                    | 0.32            | 99.58% (235/236)  | Non-Toxin |  |
| 825   | ORF7b | A*01:01 | 10     | MIELSLIDFY  | 0.06184        | Consensus (ann/smm)                    | 0.35            | 99.58% (235/236)  | Non-Toxin |  |
| 826   | ORF7b | A*02:01 | 9      | MLIIFWFSL   | 0.50177        | Consensus (ann/comblib_sidney2008/smm) | 0.2             | 99.58% (235/236)  | Non-Toxin |  |
| 827   | ORF7b | A*02:06 | 9      | MLIIFWFSL   | 0.50177        | Consensus (ann/smm)                    | 0.41            | 99.58% (235/236)  | Non-Toxin |  |
| 828   | ORF7b | A*02:01 | 10     | SLIDFYLCFL  | 0.18838        | Consensus (ann/smm)                    | 0.14            | 98.31% (232/236)  | Non-Toxin |  |
| 829   | ORF7b | A*02:03 | 10     | SLIDFYLCFL  | 0.18838        | Consensus (ann/smm)                    | 0.49            | 98.31% (232/236)  | Non-Toxin |  |
| 830   | ORF7b | A*02:01 | 9      | YLCFLAFL    | 0.21865        | Consensus (ann/comblib_sidney2008/smm) | 0.3             | 98.31% (232/236)  | Non-Toxin |  |
| 831   | ORF7b | A*23:01 | 10     | YLCFLAFLF   | 0.22196        | Consensus (ann/smm)                    | 0.42            | 98.31% (232/236)  | Non-Toxin |  |
| S.No. | ORF   | Allele  | Length | Peptide     | Immunogenicity | Method used                            | Percentile Rank | Conservancy       | Toxicity  |  |
| 832   | ORF8  | B*53:01 | 9      | CPIHFYSKW   | -0.07935       | Consensus (ann/comblib_sidney2008/smm) | 0.2             | 99.38% (477/480)  | Non-Toxin |  |
| 833   | ORF8  | B*51:01 | 9      | CPIHFYSKW   | -0.07935       | Consensus (ann/comblib_sidney2008/smm) | 0.8             | 99.38% (477/480)  | Non-Toxin |  |
| 834   | ORF8  | B*53:01 | 10     | CPIHFYSKWY  | -0.02216       | Consensus (ann/smm)                    | 0.2             | 99.38% (477/480)  | Non-Toxin |  |
| 835   | ORF8  | A*01:01 | 10     | CSFYEDFLEY  | 0.31272        | Consensus (ann/smm)                    | 0.24            | 99.79% (479/480)  | Non-Toxin |  |
| 836   | ORF8  | A*30:02 | 10     | CSFYEDFLEY  | 0.31272        | Consensus (ann/smm)                    | 0.8             | 99.79% (479/480)  | Non-Toxin |  |
| 837   | ORF8  | A*33:01 | 9      | DFLEYHDVR   | 0.16684        | Consensus (ann/smm)                    | 0.13            | 99.58% (478/480)  | Non-Toxin |  |
| 838   | ORF8  | A*02:03 | 10     | FLEYHDVRV   | 0.18854        | Consensus (ann/smm)                    | 0.7             | 99.79% (479/480)  | Non-Toxin |  |
| 839   | ORF8  | B*40:01 | 11     | FLEYHDVRVVL | 0.22976        | ann                                    | 0.93            | 99.79% (479/480)  | Non-Toxin |  |
| 840   | ORF8  | A*02:03 | 8      | FLGIITV     | 0.34382        | Consensus (ann/smm)                    | 0.51            | 99.17% (476/480)  | Non-Toxin |  |
| 841   | ORF8  | A*02:01 | 8      | FLGIITV     | 0.34382        | Consensus (ann/smm)                    | 0.72            | 99.17% (476/480)  | Non-Toxin |  |
| 842   | ORF8  | A*02:03 | 9      | FLGIITVA    | 0.36794        | Consensus (ann/smm)                    | 0.72            | 99.17% (476/480)  | Non-Toxin |  |
| 843   | ORF8  | A*02:03 | 10     | FLGIITVA    | 0.40656        | Consensus (ann/smm)                    | 0.85            | 99.17% (476/480)  | Non-Toxin |  |
| 844   | ORF8  | B*15:01 | 11     | FLGIITVA    | 0.44486        | ann                                    | 0.7             | 99.17% (476/480)  | Non-Toxin |  |
| 845   | ORF8  | A*02:01 | 11     | FLVFLGIITV  | 0.46372        | Consensus (ann/smm)                    | 0.46            | 99.17% (476/480)  | Non-Toxin |  |
| 846   | ORF8  | A*68:01 | 9      | FTINCQEPK   | -0.04683       | Consensus (ann/smm)                    | 0.18            | 100.00% (480/480) | Non-Toxin |  |
| 847   | ORF8  | A*11:01 | 9      | FTINCQEPK   | -0.04683       | Consensus (ann/smm)                    | 0.54            | 100.00% (480/480) | Non-Toxin |  |
| 848   | ORF8  | A*31:01 | 8      | FYSKWYIR    | 0.05384        | ann                                    | 0.38            | 99.38% (477/480)  | Non-Toxin |  |
| 849   | ORF8  | A*33:01 | 8      | FYSKWYIR    | 0.05384        | ann                                    | 0.47            | 99.38% (477/480)  | Non-Toxin |  |
| 850   | ORF8  | A*24:02 | 9      | FYSKWYIRV   | 0.08408        | Consensus (ann/smm)                    | 0.8             | 99.38% (477/480)  | Non-Toxin |  |
| 851   | ORF8  | A*30:01 | 9      | GARKSAPLI   | -0.34031       | Consensus (ann/comblib_sidney2008/smm) | 0.3             | 99.17% (476/480)  | Non-Toxin |  |
| 852   | ORF8  | B*15:01 | 9      | GIITVA      | 0.2148         | Consensus (ann/comblib_sidney2008/smm) | 0.3             | 99.17% (476/480)  | Non-Toxin |  |
| 853   | ORF8  | A*26:01 | 9      | GIITVA      | 0.2148         | Consensus (ann/smm)                    | 0.45            | 99.17% (476/480)  | Non-Toxin |  |
| 854   | ORF8  | B*57:01 | 9      | GSLVVRCSF   | -0.0153        | Consensus (ann/smm)                    | 0.88            | 100.00% (480/480) | Non-Toxin |  |
| 855   | ORF8  | A*30:02 | 10     | GSLVVRCSFY  | 0.00657        | Consensus (ann/smm)                    | 0.24            | 100.00% (480/480) | Non-Toxin |  |
| 856   | ORF8  | A*31:01 | 9      | HFYSKWYIR   | -0.09452       | Consensus (ann/smm)                    | 0.11            | 99.38% (477/480)  | Non-Toxin |  |
| 857   | ORF8  | A*33:01 | 9      | HFYSKWYIR   | -0.09452       | Consensus (ann/smm)                    | 0.12            | 99.38% (477/480)  | Non-Toxin |  |
| 858   | ORF8  | A*23:01 | 11     | IGNYTVSCLPF | -0.15551       | Consensus (ann/smm)                    | 1               | 51.46% (247/480)  | Non-Toxin |  |
| 859   | ORF8  | A*31:01 | 10     | IHFYSKWYIR  | -0.05367       | Consensus (ann/smm)                    | 0.53            | 99.38% (477/480)  | Non-Toxin |  |
| 860   | ORF8  | A*30:02 | 9      | IQYIDIGNY   | 0.30442        | Consensus (ann/smm)                    | 0.12            | 99.38% (477/480)  | Non-Toxin |  |
| 861   | ORF8  | B*15:01 | 9      | IQYIDIGNY   | 0.30442        | Consensus (ann/comblib_sidney2008/smm) | 0.34            | 99.38% (477/480)  | Non-Toxin |  |
| 862   | ORF8  | A*32:01 | 11     | KLGSVVRCSF  | -0.17931       | ann                                    | 0.83            | 100.00% (480/480) | Non-Toxin |  |
| 863   | ORF8  | B*58:01 | 9      | KSAPLIELC   | 0.19404        | Consensus (ann/comblib_sidney2008/smm) | 0.4             | 99.17% (476/480)  | Non-Toxin |  |
| 864   | ORF8  | A*31:01 | 9      | KWYIRVGAR   | 0.27344        | Consensus (ann/smm)                    | 0.46            | 99.38% (477/480)  | Non-Toxin |  |
| 865   | ORF8  | B*40:01 | 10     | LEYHDVRVVL  | 0.20083        | Consensus (ann/smm)                    | 0.36            | 99.79% (479/480)  | Non-Toxin |  |
| 866   | ORF8  | B*15:01 | 10     | LGIITVA     | 0.34746        | Consensus (ann/smm)                    | 0.31            | 99.17% (476/480)  | Non-Toxin |  |
| 867   | ORF8  | B*15:01 | 10     | LQSQTHQPY   | -0.25674       | Consensus (ann/smm)                    | 0.17            | 96.04% (461/480)  | Non-Toxin |  |
| 868   | ORF8  | A*02:03 | 10     | LVFLGIITV   | 0.37016        | Consensus (ann/smm)                    | 0.48            | 99.17% (476/480)  | Non-Toxin |  |
| 869   | ORF8  | A*02:06 | 10     | LVFLGIITV   | 0.37016        | Consensus (ann/smm)                    | 0.79            | 99.17% (476/480)  | Non-Toxin |  |
| 870   | ORF8  | B*51:01 | 9      | MKFLVFLGI   | 0.18768        | Consensus (ann/comblib_sidney2008/smm) | 0.98            | 99.17% (476/480)  | Non-Toxin |  |



| 871   | ORF8      | A*23:01 | 9      | NYTVSCLPF   | -0.17355       | Consensus (ann/smm)                    | 0.23            | 51.46% (247/480)  | Non-Toxin |  |
|-------|-----------|---------|--------|-------------|----------------|----------------------------------------|-----------------|-------------------|-----------|--|
| 872   | ORF8      | A*24:02 | 9      | NYTVSCLPF   | -0.17355       | Consensus (ann/smm)                    | 0.34            | 51.46% (247/480)  | Non-Toxin |  |
| 873   | ORF8      | A*33:01 | 11     | PIHFYSKWYIR | 0.03675        | ann                                    | 0.94            | 99.38% (477/480)  | Non-Toxin |  |
| 874   | ORF8      | A*01:01 | 9      | QSCTQHQPY   | -0.16503       | Consensus (ann/smm)                    | 0.28            | 96.04% (461/480)  | Non-Toxin |  |
| 875   | ORF8      | A*23:01 | 10     | QYIDIGNYTV  | 0.24159        | Consensus (ann/smm)                    | 0.58            | 99.79% (479/480)  | Non-Toxin |  |
| 876   | ORF8      | A*01:01 | 11     | RCSFYEDFLEY | 0.33894        | Consensus (ann/smm)                    | 0.56            | 99.79% (479/480)  | Non-Toxin |  |
| 877   | ORF8      | B*08:01 | 10     | RVGARKSAPL  | -0.23842       | Consensus (ann/smm)                    | 0.44            | 99.17% (476/480)  | Non-Toxin |  |
| 878   | ORF8      | A*30:02 | 9      | SLVVRCSFY   | -0.01663       | Consensus (ann/smm)                    | 0.57            | 100.00% (480/480) | Non-Toxin |  |
| 879   | ORF8      | A*68:02 | 9      | TVSCLPFTI   | -0.00771       | Consensus (ann/comblib_sidney2008/smm) | 0.9             | 51.46% (247/480)  | Non-Toxin |  |
| 880   | ORF8      | A*02:01 | 9      | YIDIGNYTV   | 0.18759        | Consensus (ann/comblib_sidney2008/smm) | 0.5             | 99.79% (479/480)  | Non-Toxin |  |
| 881   | ORF8      | A*02:06 | 9      | YIDIGNYTV   | 0.18759        | Consensus (ann/smm)                    | 0.73            | 99.79% (479/480)  | Non-Toxin |  |
| 882   | ORF8      | A*02:06 | 10     | YTVSCLPFTI  | -0.10533       | Consensus (ann/smm)                    | 0.53            | 51.46% (247/480)  | Non-Toxin |  |
| 883   | ORF8      | A*02:06 | 9      | YVDDPCPI    | -0.0051        | Consensus (ann/smm)                    | 0.68            | 99.17% (476/480)  | Non-Toxin |  |
| S.No. | ORF       | Allele  | Length | Peptide     | Immunogenicity | Method used                            | Percentile Rank | Conservancy       | Toxicity  |  |
| 884   | S Protein | B*40:01 | 9      | AEIRASANL   | 0.00689        | Consensus (ann/smm)                    | 0.12            | 93.23% (468/502)  | Non-Toxin |  |
| 885   | S Protein | B*44:03 | 9      | AEIRASANL   | 0.00689        | Consensus (ann/smm)                    | 0.2             | 93.23% (468/502)  | Non-Toxin |  |
| 886   | S Protein | B*44:02 | 9      | AEIRASANL   | 0.00689        | Consensus (ann/smm)                    | 0.23            | 93.23% (468/502)  | Non-Toxin |  |
| 887   | S Protein | B*44:02 | 9      | AENSVAYSN   | -0.19132       | Consensus (ann/smm)                    | 0.21            | 93.82% (471/502)  | Non-Toxin |  |
| 888   | S Protein | B*44:03 | 9      | AENSVAYSN   | -0.19132       | Consensus (ann/smm)                    | 0.27            | 93.82% (471/502)  | Non-Toxin |  |
| 889   | S Protein | B*44:02 | 9      | AEVQIDRLI   | 0.08452        | Consensus (ann/smm)                    | 0.18            | 92.63% (465/502)  | Non-Toxin |  |
| 890   | S Protein | B*44:03 | 9      | AEVQIDRLI   | 0.08452        | Consensus (ann/smm)                    | 0.2             | 92.63% (465/502)  | Non-Toxin |  |
| 891   | S Protein | A*26:01 | 9      | CVADYSVLY   | -0.09595       | Consensus (ann/smm)                    | 0.17            | 93.82% (471/502)  | Non-Toxin |  |
| 892   | S Protein | A*26:01 | 10     | EFVFKNIDGY  | 0.0787         | Consensus (ann/smm)                    | 0.22            | 92.03% (462/502)  | Non-Toxin |  |
| 893   | S Protein | B*51:01 | 8      | EPLVDLPI    | 0.03974        | Consensus (ann/smm)                    | 0.18            | 93.63% (470/502)  | Non-Toxin |  |
| 894   | S Protein | A*26:01 | 9      | ETKCTLKSF   | -0.37555       | Consensus (ann/smm)                    | 0.17            | 93.43% (469/502)  | Non-Toxin |  |
| 895   | S Protein | A*26:01 | 10     | EVFAQVKQIY  | -0.21823       | Consensus (ann/smm)                    | 0.13            | 92.43% (464/502)  | Non-Toxin |  |
| 896   | S Protein | B*35:01 | 9      | FAMQMAYRF   | -0.28061       | Consensus (ann/comblib_sidney2008/smm) | 0.2             | 93.82% (471/502)  | Non-Toxin |  |
| 897   | S Protein | B*40:01 | 9      | FEVVSQPFL   | -0.17076       | Consensus (ann/smm)                    | 0.28            | 92.83% (466/502)  | Non-Toxin |  |
| 898   | S Protein | A*02:03 | 9      | FIAGLIAIV   | 0.27206        | Consensus (ann/smm)                    | 0.16            | 93.82% (471/502)  | Non-Toxin |  |
| 899   | S Protein | B*53:01 | 10     | FLPFFSNVTW  | 0.11853        | Consensus (ann/smm)                    | 0.21            | 93.43% (469/502)  | Non-Toxin |  |
| 900   | S Protein | B*08:01 | 9      | FNATRFASV   | 0.14872        | Consensus (ann/comblib_sidney2008/smm) | 0.2             | 93.43% (469/502)  | Non-Toxin |  |
| 901   | S Protein | B*53:01 | 10     | FPNITNLCPF  | 0.1009         | Consensus (ann/smm)                    | 0.06            | 93.82% (471/502)  | Non-Toxin |  |
| 902   | S Protein | B*35:01 | 10     | FPNITNLCPF  | 0.1009         | Consensus (ann/smm)                    | 0.08            | 93.82% (471/502)  | Non-Toxin |  |
| 903   | S Protein | B*51:01 | 10     | FPNITNLCPF  | 0.1009         | Consensus (ann/smm)                    | 0.17            | 93.82% (471/502)  | Non-Toxin |  |
| 904   | S Protein | B*51:01 | 10     | FPQSAPHGVV  | -0.0936        | Consensus (ann/smm)                    | 0.27            | 93.43% (469/502)  | Non-Toxin |  |
| 905   | S Protein | A*68:02 | 9      | FTISVTTEI   | 0.04473        | Consensus (ann/comblib_sidney2008/smm) | 0.2             | 93.82% (471/502)  | Non-Toxin |  |
| 906   | S Protein | A*26:01 | 9      | FVFKNIDGY   | -0.0215        | Consensus (ann/smm)                    | 0.11            | 92.03% (462/502)  | Non-Toxin |  |
| 907   | S Protein | A*02:06 | 10     | FVFLVLLPLV  | 0.02996        | Consensus (ann/smm)                    | 0.1             | 92.83% (466/502)  | Non-Toxin |  |
| 908   | S Protein | A*02:01 | 10     | FVFLVLLPLV  | 0.02996        | Consensus (ann/smm)                    | 0.28            | 92.83% (466/502)  | Non-Toxin |  |
| 909   | S Protein | A*68:01 | 9      | FVIRGDEVV   | 0.25778        | Consensus (ann/smm)                    | 0.17            | 93.63% (470/502)  | Non-Toxin |  |
| 910   | S Protein | A*02:06 | 10     | FVSNGTHWFV  | 0.29638        | Consensus (ann/smm)                    | 0.18            | 93.43% (469/502)  | Non-Toxin |  |
| 911   | S Protein | A*02:01 | 10     | FVSNGTHWFV  | 0.29638        | Consensus (ann/smm)                    | 0.21            | 93.43% (469/502)  | Non-Toxin |  |
| 912   | S Protein | A*68:02 | 10     | FVSNGTHWFV  | 0.29638        | Consensus (ann/smm)                    | 0.27            | 93.43% (469/502)  | Non-Toxin |  |
| 913   | S Protein | B*44:03 | 9      | GEVFNATRF   | 0.22473        | Consensus (ann/smm)                    | 0.2             | 93.63% (470/502)  | Non-Toxin |  |
| 914   | S Protein | A*33:01 | 11     | GNYNLYRLFR  | 0.08205        | ann                                    | 0.11            | 92.63% (465/502)  | Non-Toxin |  |
| 915   | S Protein | A*31:01 | 9      | GTHWFVTQR   | 0.35133        | Consensus (ann/smm)                    | 0.24            | 93.23% (468/502)  | Non-Toxin |  |
| 916   | S Protein | A*03:01 | 9      | GVYFASTEK   | 0.09023        | Consensus (ann/smm)                    | 0.2             | 93.63% (470/502)  | Non-Toxin |  |
| 917   | S Protein | A*11:01 | 9      | GVYFASTEK   | 0.09023        | Consensus (ann/smm)                    | 0.23            | 93.63% (470/502)  | Non-Toxin |  |
| 918   | S Protein | A*03:01 | 9      | GVYYHKNNK   | -0.18566       | Consensus (ann/smm)                    | 0.2             | 92.03% (462/502)  | Non-Toxin |  |
| 919   | S Protein | A*68:01 | 10     | GVYYPDKVFR  | -0.09388       | Consensus (ann/smm)                    | 0.27            | 93.82% (471/502)  | Non-Toxin |  |
| 920   | S Protein | B*51:01 | 9      | IAIPTNFTI   | 0.18523        | Consensus (ann/comblib_sidney2008/smm) | 0.2             | 93.82% (471/502)  | Non-Toxin |  |

|     |           |         |    |             |          |                                        |      |                  |           |  |
|-----|-----------|---------|----|-------------|----------|----------------------------------------|------|------------------|-----------|--|
| 921 | S Protein | A*30:02 | 9  | IGAGICASY   | 0.06201  | Consensus (ann/smm)                    | 0.21 | 93.82% (471/502) | Non-Toxin |  |
| 922 | S Protein | B*35:01 | 9  | IPFAMQMAY   | -0.32801 | Consensus (ann/comblib_sidney2008/smm) | 0.1  | 93.82% (471/502) | Non-Toxin |  |
| 923 | S Protein | A*30:01 | 9  | ITRFQTLA    | 0.0425   | Consensus (ann/comblib_sidney2008/smm) | 0.2  | 93.43% (469/502) | Non-Toxin |  |
| 924 | S Protein | A*31:01 | 10 | KGIYQTSNFR  | -0.12831 | Consensus (ann/smm)                    | 0.28 | 93.43% (469/502) | Non-Toxin |  |
| 925 | S Protein | A*32:01 | 9  | KIYSKHTPI   | -0.32094 | Consensus (ann/comblib_sidney2008/smm) | 0.2  | 93.03% (467/502) | Non-Toxin |  |
| 926 | S Protein | A*31:01 | 9  | KQGNFKNLR   | -0.09645 | Consensus (ann/smm)                    | 0.19 | 92.63% (465/502) | Non-Toxin |  |
| 927 | S Protein | A*30:02 | 10 | KSFTVEKGIY  | 0.11812  | Consensus (ann/smm)                    | 0.11 | 93.23% (468/502) | Non-Toxin |  |
| 928 | S Protein | B*58:01 | 8  | KSNIIRGW    | 0.33874  | ann                                    | 0.25 | 93.82% (471/502) | Non-Toxin |  |
| 929 | S Protein | B*57:01 | 8  | KSNIIRGW    | 0.33874  | ann                                    | 0.29 | 93.82% (471/502) | Non-Toxin |  |
| 930 | S Protein | A*31:01 | 9  | KSNLKPFR    | -0.0764  | Consensus (ann/smm)                    | 0.14 | 92.63% (465/502) | Non-Toxin |  |
| 931 | S Protein | A*31:01 | 9  | KSWMESEFR   | -0.01013 | Consensus (ann/smm)                    | 0.26 | 92.43% (464/502) | Non-Toxin |  |
| 932 | S Protein | A*30:02 | 9  | KTSVDCTMY   | -0.11115 | Consensus (ann/smm)                    | 0.12 | 93.82% (471/502) | Non-Toxin |  |
| 933 | S Protein | A*30:02 | 10 | KVGGNYNYLY  | 0.01951  | Consensus (ann/smm)                    | 0.21 | 92.63% (465/502) | Non-Toxin |  |
| 934 | S Protein | A*24:02 | 10 | KWPWYIWLGF  | 0.56424  | Consensus (ann/smm)                    | 0.11 | 93.43% (469/502) | Non-Toxin |  |
| 935 | S Protein | A*23:01 | 10 | KWPWYIWLGF  | 0.56424  | Consensus (ann/smm)                    | 0.12 | 93.43% (469/502) | Non-Toxin |  |
| 936 | S Protein | A*32:01 | 10 | KWPWYIWLGF  | 0.56424  | Consensus (ann/smm)                    | 0.18 | 93.43% (469/502) | Non-Toxin |  |
| 937 | S Protein | A*02:03 | 9  | LLFNKVTLA   | -0.11337 | Consensus (ann/smm)                    | 0.23 | 93.23% (468/502) | Non-Toxin |  |
| 938 | S Protein | A*01:01 | 10 | LLTDEIAQY   | 0.05204  | Consensus (ann/smm)                    | 0.28 | 93.43% (469/502) | Non-Toxin |  |
| 939 | S Protein | B*51:01 | 10 | LPDDFTGCVI  | 0.19184  | Consensus (ann/smm)                    | 0.14 | 93.63% (470/502) | Non-Toxin |  |
| 940 | S Protein | B*53:01 | 10 | LPDDFTGCVI  | 0.19184  | Consensus (ann/smm)                    | 0.28 | 93.63% (470/502) | Non-Toxin |  |
| 941 | S Protein | B*53:01 | 9  | LPFFSNVTW   | 0.04613  | Consensus (ann/comblib_sidney2008/smm) | 0.2  | 93.43% (469/502) | Non-Toxin |  |
| 942 | S Protein | B*53:01 | 10 | LPFFSNVTFW  | 0.18944  | Consensus (ann/smm)                    | 0.13 | 91.83% (461/502) | Non-Toxin |  |
| 943 | S Protein | B*51:01 | 10 | LPFFSNVTFW  | 0.18944  | Consensus (ann/smm)                    | 0.2  | 91.83% (461/502) | Non-Toxin |  |
| 944 | S Protein | B*53:01 | 10 | LPIGINITRF  | 0.38888  | Consensus (ann/smm)                    | 0.12 | 93.43% (469/502) | Non-Toxin |  |
| 945 | S Protein | B*35:01 | 10 | LPIGINITRF  | 0.38888  | Consensus (ann/smm)                    | 0.17 | 93.43% (469/502) | Non-Toxin |  |
| 946 | S Protein | B*51:01 | 9  | LPLVSSQCV   | -0.40815 | Consensus (ann/comblib_sidney2008/smm) | 0.2  | 93.82% (471/502) | Non-Toxin |  |
| 947 | S Protein | B*51:01 | 10 | LPVSMTKTSV  | -0.55317 | Consensus (ann/smm)                    | 0.2  | 93.82% (471/502) | Non-Toxin |  |
| 948 | S Protein | B*15:01 | 11 | LQIPFAMQMAY | -0.22124 | ann                                    | 0.28 | 93.82% (471/502) | Non-Toxin |  |
| 949 | S Protein | A*01:01 | 9  | LTDEIAQY    | 0.02757  | Consensus (ann/smm)                    | 0.11 | 93.43% (469/502) | Non-Toxin |  |
| 950 | S Protein | A*24:02 | 10 | LYNSASFSTF  | -0.29831 | Consensus (ann/smm)                    | 0.11 | 93.82% (471/502) | Non-Toxin |  |
| 951 | S Protein | A*23:01 | 10 | LYNSASFSTF  | -0.29831 | Consensus (ann/smm)                    | 0.14 | 93.82% (471/502) | Non-Toxin |  |
| 952 | S Protein | A*02:06 | 10 | MQMAYRFNGI  | 0.15371  | Consensus (ann/smm)                    | 0.18 | 93.82% (471/502) | Non-Toxin |  |
| 953 | S Protein | A*68:01 | 9  | NSASFSTFK   | -0.09434 | Consensus (ann/smm)                    | 0.16 | 93.82% (471/502) | Non-Toxin |  |
| 954 | S Protein | A*68:02 | 9  | NTQEVFAQV   | 0.17889  | Consensus (ann/comblib_sidney2008/smm) | 0.2  | 92.83% (466/502) | Non-Toxin |  |
| 955 | S Protein | A*01:01 | 10 | NTSNQVAVLY  | -0.06762 | Consensus (ann/smm)                    | 0.27 | 93.82% (471/502) | Non-Toxin |  |
| 956 | S Protein | A*68:01 | 10 | NVYADSFVIR  | 0.12147  | Consensus (ann/smm)                    | 0.14 | 93.82% (471/502) | Non-Toxin |  |
| 957 | S Protein | A*33:01 | 8  | NYLYRLFR    | 0.13144  | ann                                    | 0.07 | 92.63% (465/502) | Non-Toxin |  |
| 958 | S Protein | A*24:02 | 9  | NYNYLYRLF   | 0.0171   | Consensus (ann/smm)                    | 0.17 | 92.63% (465/502) | Non-Toxin |  |
| 959 | S Protein | A*33:01 | 10 | NYNYLYRLFR  | 0.08754  | Consensus (ann/smm)                    | 0.07 | 92.63% (465/502) | Non-Toxin |  |
| 960 | S Protein | A*01:01 | 11 | PLLTDEIAQY  | 0.07418  | Consensus (ann/smm)                    | 0.17 | 93.43% (469/502) | Non-Toxin |  |
| 961 | S Protein | A*23:01 | 9  | PYRVVLSF    | 0.03138  | Consensus (ann/smm)                    | 0.2  | 92.63% (465/502) | Non-Toxin |  |
| 962 | S Protein | A*03:01 | 9  | QIYKTPPIK   | -0.12244 | Consensus (ann/smm)                    | 0.27 | 92.23% (463/502) | Non-Toxin |  |
| 963 | S Protein | A*23:01 | 9  | QYIKWPWYI   | 0.21624  | Consensus (ann/smm)                    | 0.11 | 93.43% (469/502) | Non-Toxin |  |
| 964 | S Protein | A*24:02 | 9  | QYIKWPWYI   | 0.21624  | Consensus (ann/smm)                    | 0.11 | 93.43% (469/502) | Non-Toxin |  |
| 965 | S Protein | A*23:01 | 10 | QYIKWPWYIW  | 0.31425  | Consensus (ann/smm)                    | 0.16 | 93.43% (469/502) | Non-Toxin |  |
| 966 | S Protein | A*24:02 | 10 | QYIKWPWYIW  | 0.31425  | Consensus (ann/smm)                    | 0.21 | 93.43% (469/502) | Non-Toxin |  |
| 967 | S Protein | A*30:02 | 9  | RISNCVADY   | -0.02787 | Consensus (ann/smm)                    | 0.12 | 93.82% (471/502) | Non-Toxin |  |
| 968 | S Protein | A*03:01 | 9  | RLFRKSNLK   | -0.28759 | Consensus (ann/smm)                    | 0.1  | 92.63% (465/502) | Non-Toxin |  |
| 969 | S Protein | A*32:01 | 11 | RLFRKSNLKP  | -0.48624 | ann                                    | 0.26 | 92.63% (465/502) | Non-Toxin |  |
| 970 | S Protein | B*57:01 | 9  | RSFIEDLLF   | 0.27446  | Consensus (ann/smm)                    | 0.23 | 93.43% (469/502) | Non-Toxin |  |
| 971 | S Protein | B*15:01 | 10 | RVYSTGSNVF  | -0.23394 | Consensus (ann/smm)                    | 0.21 | 93.82% (471/502) | Non-Toxin |  |

|      |           |         |    |             |          |                                        |      |                  |           |  |
|------|-----------|---------|----|-------------|----------|----------------------------------------|------|------------------|-----------|--|
| 972  | S Protein | A*30:02 | 9  | SANNCTFEY   | 0.13273  | Consensus (ann/smm)                    | 0.26 | 92.83% (466/502) | Non-Toxin |  |
| 973  | S Protein | B*44:03 | 10 | SETKCTLKSF  | -0.5082  | Consensus (ann/smm)                    | 0.19 | 93.43% (469/502) | Non-Toxin |  |
| 974  | S Protein | A*30:02 | 11 | SKVGGNYNYLY | 0.05491  | Consensus (ann/smm)                    | 0.18 | 92.63% (465/502) | Non-Toxin |  |
| 975  | S Protein | B*07:02 | 8  | SPRRARSV    | 0.01608  | Consensus (ann/smm)                    | 0.17 | 93.82% (471/502) | Non-Toxin |  |
| 976  | S Protein | B*07:02 | 9  | SPRRARSA    | 0.0402   | Consensus (ann/comblib_sidney2008/smm) | 0.1  | 93.82% (471/502) | Non-Toxin |  |
| 977  | S Protein | B*07:02 | 10 | SPRRARSVAS  | 0.05935  | Consensus (ann/smm)                    | 0.14 | 93.82% (471/502) | Non-Toxin |  |
| 978  | S Protein | A*30:02 | 10 | SSANNCTFEY  | 0.14123  | Consensus (ann/smm)                    | 0.23 | 92.83% (466/502) | Non-Toxin |  |
| 979  | S Protein | A*01:01 | 10 | SSANNCTFEY  | 0.14123  | Consensus (ann/smm)                    | 0.25 | 92.83% (466/502) | Non-Toxin |  |
| 980  | S Protein | A*32:01 | 9  | STQDLFLPF   | 0.06828  | Consensus (ann/comblib_sidney2008/smm) | 0.2  | 93.03% (467/502) | Non-Toxin |  |
| 981  | S Protein | A*26:01 | 10 | SVASQSIAY   | -0.16721 | Consensus (ann/smm)                    | 0.19 | 93.82% (471/502) | Non-Toxin |  |
| 982  | S Protein | B*44:03 | 10 | TECSNLLLQY  | -0.28855 | Consensus (ann/smm)                    | 0.28 | 93.82% (471/502) | Non-Toxin |  |
| 983  | S Protein | A*11:01 | 10 | TEILPVSMTK  | -0.21981 | Consensus (ann/smm)                    | 0.28 | 93.82% (471/502) | Non-Toxin |  |
| 984  | S Protein | B*44:02 | 10 | TEKSNIIRGW  | 0.07559  | Consensus (ann/smm)                    | 0.24 | 93.63% (470/502) | Non-Toxin |  |
| 985  | S Protein | B*53:01 | 9  | TPGDSSSGW   | -0.40333 | Consensus (ann/comblib_sidney2008/smm) | 0.2  | 93.43% (469/502) | Non-Toxin |  |
| 986  | S Protein | A*01:01 | 9  | TSNQVAVLY   | -0.01327 | Consensus (ann/smm)                    | 0.28 | 93.82% (471/502) | Non-Toxin |  |
| 987  | S Protein | A*30:01 | 9  | TTRTQLPPA   | -0.08322 | Consensus (ann/comblib_sidney2008/smm) | 0.2  | 93.43% (469/502) | Non-Toxin |  |
| 988  | S Protein | A*30:02 | 9  | VLPFNDGVY   | 0.1815   | Consensus (ann/smm)                    | 0.28 | 93.82% (471/502) | Non-Toxin |  |
| 989  | S Protein | A*24:02 | 11 | VLYNSASFSTF | -0.29855 | Consensus (ann/smm)                    | 0.2  | 93.82% (471/502) | Non-Toxin |  |
| 990  | S Protein | A*11:01 | 10 | VTLADAGFIK  | 0.30393  | Consensus (ann/smm)                    | 0.22 | 93.23% (468/502) | Non-Toxin |  |
| 991  | S Protein | A*03:01 | 9  | VTYVPAQEK   | 0.02711  | Consensus (ann/smm)                    | 0.27 | 93.63% (470/502) | Non-Toxin |  |
| 992  | S Protein | A*23:01 | 10 | VYSSANNCTF  | -0.21728 | Consensus (ann/smm)                    | 0.12 | 92.63% (465/502) | Non-Toxin |  |
| 993  | S Protein | A*24:02 | 10 | VYSSANNCTF  | -0.21728 | Consensus (ann/smm)                    | 0.12 | 92.63% (465/502) | Non-Toxin |  |
| 994  | S Protein | A*24:02 | 9  | VYSTGNSVF   | -0.11871 | Consensus (ann/smm)                    | 0.17 | 93.82% (471/502) | Non-Toxin |  |
| 995  | S Protein | A*31:01 | 9  | VYYPDKVFR   | -0.09052 | Consensus (ann/smm)                    | 0.18 | 93.82% (471/502) | Non-Toxin |  |
| 996  | S Protein | B*53:01 | 9  | WPWYIWLGF   | 0.41673  | Consensus (ann/comblib_sidney2008/smm) | 0.2  | 93.43% (469/502) | Non-Toxin |  |
| 997  | S Protein | B*51:01 | 10 | WPWYIWLGF   | 0.50004  | Consensus (ann/smm)                    | 0.14 | 93.43% (469/502) | Non-Toxin |  |
| 998  | S Protein | A*26:01 | 9  | WTAGAAAYY   | 0.15259  | Consensus (ann/smm)                    | 0.11 | 93.43% (469/502) | Non-Toxin |  |
| 999  | S Protein | A*30:02 | 9  | WTAGAAAYY   | 0.15259  | Consensus (ann/smm)                    | 0.12 | 93.43% (469/502) | Non-Toxin |  |
| 1000 | S Protein | A*01:01 | 9  | WTAGAAAYY   | 0.15259  | Consensus (ann/smm)                    | 0.17 | 93.43% (469/502) | Non-Toxin |  |
| 1001 | S Protein | A*68:02 | 10 | WTAGAAAYYV  | 0.15455  | Consensus (ann/smm)                    | 0.06 | 93.43% (469/502) | Non-Toxin |  |
| 1002 | S Protein | B*44:02 | 9  | YEQYIKWPW   | 0.06574  | Consensus (ann/smm)                    | 0.11 | 93.63% (470/502) | Non-Toxin |  |
| 1003 | S Protein | B*44:03 | 9  | YEQYIKWPW   | 0.06574  | Consensus (ann/smm)                    | 0.12 | 93.63% (470/502) | Non-Toxin |  |
| 1004 | S Protein | B*44:03 | 10 | YEQYIKWPWY  | 0.20685  | Consensus (ann/smm)                    | 0.14 | 93.43% (469/502) | Non-Toxin |  |
| 1005 | S Protein | B*44:02 | 10 | YEQYIKWPWY  | 0.20685  | Consensus (ann/smm)                    | 0.24 | 93.43% (469/502) | Non-Toxin |  |
| 1006 | S Protein | A*02:01 | 9  | YLQPRTFLL   | 0.1305   | Consensus (ann/comblib_sidney2008/smm) | 0.3  | 93.43% (469/502) | Non-Toxin |  |
| 1007 | S Protein | A*03:01 | 10 | YLQPRTFLLK  | 0.1338   | Consensus (ann/smm)                    | 0.18 | 93.43% (469/502) | Non-Toxin |  |
| 1008 | S Protein | A*33:01 | 9  | YNYLYRLFR   | 0.0918   | Consensus (ann/smm)                    | 0.12 | 92.63% (465/502) | Non-Toxin |  |
| 1009 | S Protein | B*07:02 | 10 | YDPKVFSSV   | -0.24316 | Consensus (ann/smm)                    | 0.26 | 93.82% (471/502) | Non-Toxin |  |
| 1010 | S Protein | A*02:06 | 9  | YQDVNCTEV   | 0.08295  | Consensus (ann/smm)                    | 0.19 | 67.33% (338/502) | Non-Toxin |  |
| 1011 | S Protein | A*01:01 | 10 | YTNSFTRGVY  | 0.08467  | Consensus (ann/smm)                    | 0.17 | 93.43% (469/502) | Non-Toxin |  |
| 1012 | S Protein | A*30:02 | 10 | YTNSFTRGVY  | 0.08467  | Consensus (ann/smm)                    | 0.18 | 93.43% (469/502) | Non-Toxin |  |
| 1013 | S Protein | A*24:02 | 11 | YYVGYLQPRTF | -0.02378 | Consensus (ann/smm)                    | 0.15 | 93.43% (469/502) | Non-Toxin |  |

**Supplementary Table S3:** High Percentile Ranking HTL epitopes-HLA allele pairs screened from entire proteome of SARS-CoV-2 by the “MHC-II Binding Predictions” tool of IEDB. These epitopes were further utilized to identify the potentially immunogenic multiple epitope cluster based HTL Ag-Patches from the entire proteome of the SRAS-CoV-2. The epitopes shown in **BLUE** are the epitope which form Overlapping epitope clusters. The screened epitopes are in consensus with the previous studies [Srivastava et al. 2020a; Srivastava et al., 2020b and Grifoni et al., 2020a].

| S.No. | ORF       | Allele                | Length | Method used                  | Peptide          | Percentile Rank | Adjusted rank | Conservancy      | Toxicity  |
|-------|-----------|-----------------------|--------|------------------------------|------------------|-----------------|---------------|------------------|-----------|
| 1     | E Protein | DPA1*03:01/DPB1*04:02 | 15     | Consensus (comb.lib./smm/nn) | FLAFVVFLLVTLAIL  | 0.06            | 0.06          | 99.59% (480/482) | Non-Toxin |
| 2     | E Protein | DPA1*03:01/DPB1*04:02 | 15     | Consensus (comb.lib./smm/nn) | LAFFVVFLLVTLAIL  | 0.06            | 0.06          | 99.59% (480/482) | Non-Toxin |
| 3     | E Protein | DPA1*03:01/DPB1*04:02 | 15     | Consensus (comb.lib./smm/nn) | LFLAFVVFLLVTLAI  | 0.03            | 0.03          | 99.59% (480/482) | Non-Toxin |
| 4     | E Protein | DPA1*01:03/DPB1*02:01 | 15     | Consensus (comb.lib./smm/nn) | LFLAFVVFLLVTLAI  | 0.04            | 0.04          | 99.59% (480/482) | Non-Toxin |
| 5     | E Protein | DPA1*01/DPB1*04:01    | 15     | Consensus (comb.lib./smm)    | LFLAFVVFLLVTLAI  | 0.08            | 0.08          | 99.59% (480/482) | Non-Toxin |
| 6     | E Protein | DPA1*02:01/DPB1*01:01 | 15     | Consensus (comb.lib./smm/nn) | LFLAFVVFLLVTLAI  | 0.1             | 0.1           | 99.59% (480/482) | Non-Toxin |
| 7     | E Protein | DPA1*03:01/DPB1*04:02 | 15     | Consensus (comb.lib./smm/nn) | LLFLAFVVFLLVTLA  | 0.02            | 0.02          | 99.59% (480/482) | Non-Toxin |
| 8     | E Protein | DPA1*01:03/DPB1*02:01 | 15     | Consensus (comb.lib./smm/nn) | LLFLAFVVFLLVTLA  | 0.03            | 0.03          | 99.59% (480/482) | Non-Toxin |
| 9     | E Protein | DPA1*01/DPB1*04:01    | 15     | Consensus (comb.lib./smm)    | LLFLAFVVFLLVTLA  | 0.06            | 0.06          | 99.59% (480/482) | Non-Toxin |
| 10    | E Protein | DPA1*02:01/DPB1*01:01 | 15     | Consensus (comb.lib./smm/nn) | LLFLAFVVFLLVTLA  | 0.1             | 0.1           | 99.59% (480/482) | Non-Toxin |
| 11    | E Protein | DPA1*01:03/DPB1*02:01 | 15     | Consensus (comb.lib./smm/nn) | NSVLLFLAFVVFLLV  | 0.04            | 0.04          | 99.59% (480/482) | Non-Toxin |
| 12    | E Protein | DPA1*03:01/DPB1*04:02 | 15     | Consensus (comb.lib./smm/nn) | NSVLLFLAFVVFLLV  | 0.06            | 0.06          | 99.59% (480/482) | Non-Toxin |
| 13    | E Protein | DPA1*01/DPB1*04:01    | 15     | Consensus (comb.lib./smm)    | NSVLLFLAFVVFLLV  | 0.07            | 0.07          | 99.59% (480/482) | Non-Toxin |
| 14    | E Protein | DPA1*02:01/DPB1*01:01 | 15     | Consensus (comb.lib./smm/nn) | NSVLLFLAFVVFLLV  | 0.1             | 0.1           | 99.59% (480/482) | Non-Toxin |
| 15    | E Protein | DPA1*01:03/DPB1*02:01 | 15     | Consensus (comb.lib./smm/nn) | SVLLFLAFVVFLLVT  | 0.04            | 0.04          | 99.59% (480/482) | Non-Toxin |
| 16    | E Protein | DPA1*03:01/DPB1*04:02 | 15     | Consensus (comb.lib./smm/nn) | SVLLFLAFVVFLLVT  | 0.06            | 0.06          | 99.59% (480/482) | Non-Toxin |
| 17    | E Protein | DPA1*01/DPB1*04:01    | 15     | Consensus (comb.lib./smm)    | SVLLFLAFVVFLLVT  | 0.07            | 0.07          | 99.59% (480/482) | Non-Toxin |
| 18    | E Protein | DPA1*02:01/DPB1*01:01 | 15     | Consensus (comb.lib./smm/nn) | SVLLFLAFVVFLLVT  | 0.1             | 0.1           | 99.59% (480/482) | Non-Toxin |
| 19    | E Protein | DPA1*03:01/DPB1*04:02 | 15     | Consensus (comb.lib./smm/nn) | VLLFLAFVVFLLVTL  | 0.02            | 0.02          | 99.59% (480/482) | Non-Toxin |
| 20    | E Protein | DPA1*01:03/DPB1*02:01 | 15     | Consensus (comb.lib./smm/nn) | VLLFLAFVVFLLVTL  | 0.04            | 0.04          | 99.59% (480/482) | Non-Toxin |
| 21    | E Protein | DPA1*01/DPB1*04:01    | 15     | Consensus (comb.lib./smm)    | VLLFLAFVVFLLVTL  | 0.06            | 0.06          | 99.59% (480/482) | Non-Toxin |
| 22    | E Protein | DPA1*02:01/DPB1*01:01 | 15     | Consensus (comb.lib./smm/nn) | VLLFLAFVVFLLVTL  | 0.1             | 0.1           | 99.59% (480/482) | Non-Toxin |
| 23    | E Protein | DPA1*02:01/DPB1*01:01 | 15     | Consensus (comb.lib./smm/nn) | VNSVLLFLAFVVFLL  | 0.1             | 0.1           | 99.59% (480/482) | Non-Toxin |
| S.No. | ORF       | Allele                | Length | Method used                  | Peptide          | Percentile Rank | Adjusted rank | Conservancy      | Toxicity  |
| 24    | M Protein | DPA1*01:03/DPB1*02:01 | 15     | Consensus (comb.lib./smm/nn) | GLMWLSYFIASFRLF  | 0.05            | 0.05          | 97.48% (465/477) | Non-Toxin |
| 25    | M Protein | DQA1*01:01/DQB1*05:01 | 15     | Consensus (comb.lib./smm/nn) | IKLIFLWLLWPVTLA  | 0.07            | 0.07          | 97.48% (465/477) | Non-Toxin |
| 26    | M Protein | DQA1*01:01/DQB1*05:01 | 15     | Consensus (comb.lib./smm/nn) | KLIFLWLLWPVTLAC  | 0.11            | 0.11          | 97.48% (465/477) | Non-Toxin |
| 27    | M Protein | DPA1*01:03/DPB1*02:01 | 15     | Consensus (comb.lib./smm/nn) | LMWLSYFIASFRLF   | 0.05            | 0.05          | 97.48% (465/477) | Non-Toxin |
| 28    | M Protein | DRB1*09:01            | 15     | Consensus (comb.lib./smm/nn) | LSYYKLGASQRVAGD  | 0.06            | 0.06          | 97.48% (465/477) | Non-Toxin |
| 29    | M Protein | DRB1*01:01            | 15     | Consensus (comb.lib./smm/nn) | LSYYKLGASQRVAGD  | 0.67            | 0.67          | 97.48% (465/477) | Non-Toxin |
| 30    | M Protein | DPA1*01:03/DPB1*02:01 | 15     | Consensus (comb.lib./smm/nn) | MWLSYFIASFRLFAR  | 0.08            | 0.08          | 97.48% (465/477) | Non-Toxin |
| 31    | M Protein | DRB1*09:01            | 15     | Consensus (comb.lib./smm/nn) | RTLSYYKLGASQRVA  | 0.06            | 0.06          | 97.48% (465/477) | Non-Toxin |
| 32    | M Protein | DRB1*01:01            | 15     | Consensus (comb.lib./smm/nn) | RTLSYYKLGASQRVA  | 0.67            | 0.67          | 97.48% (465/477) | Non-Toxin |
| 33    | M Protein | DRB1*09:01            | 15     | Consensus (comb.lib./smm/nn) | SRTLSSYYKLGASQRV | 0.07            | 0.07          | 97.48% (465/477) | Non-Toxin |
| 34    | M Protein | DRB1*09:01            | 15     | Consensus (comb.lib./smm/nn) | SYKLGASQRVAGDS   | 0.48            | 0.48          | 97.48% (465/477) | Non-Toxin |
| 35    | M Protein | DRB1*09:01            | 15     | Consensus (comb.lib./smm/nn) | TSYYKLGASQRVAG   | 0.07            | 0.07          | 97.48% (465/477) | Non-Toxin |
| 36    | M Protein | DRB1*01:01            | 15     | Consensus (comb.lib./smm/nn) | TSYYKLGASQRVAG   | 0.67            | 0.67          | 97.48% (465/477) | Non-Toxin |
| 37    | M Protein | DPA1*01:03/DPB1*02:01 | 15     | Consensus (comb.lib./smm/nn) | VGLMWLSYFIASFRLF | 0.07            | 0.07          | 97.48% (465/477) | Non-Toxin |
| S.No. | ORF       | Allele                | Length | Method used                  | Peptide          | Percentile Rank | Adjusted rank | Conservancy      | Toxicity  |
| 38    | N Protein | DQA1*01:02/DQB1*06:02 | 15     | Consensus (comb.lib./smm/nn) | ANNAIVLQLPQGT    | 0.2             | 0.2           | 97.59% (486/498) | Non-Toxin |
| 39    | N Protein | DRB1*09:01            | 15     | Consensus (comb.lib./smm/nn) | AQFAPSASAFFGMSR  | 0.01            | 0.01          | 97.59% (486/498) | Non-Toxin |
| 40    | N Protein | DRB1*11:01            | 15     | Consensus (smm/nn/sturniolo) | DDQIGYRRATRRIR   | 0.42            | 0.42          | 97.59% (486/498) | Non-Toxin |
| 41    | N Protein | DRB1*11:01            | 15     | Consensus (smm/nn/sturniolo) | DQIGYRRATRRIRG   | 0.42            | 0.42          | 97.59% (486/498) | Non-Toxin |



| 42    | N Protein | DRB5*01:01            | 15     | Consensus (smm/nn/sturniolo) | DQIGYYRRATRRIIRG | 0.58            | 0.58          | 97.59% (486/498) | Non-Toxin |       |
|-------|-----------|-----------------------|--------|------------------------------|------------------|-----------------|---------------|------------------|-----------|-------|
| 43    | N Protein | DQA1*01:02/DQB1*06:02 | 15     | Consensus (comb.lib./smm/nn) | GTRNPANNAIVLQL   | 0.05            | 0.05          | 97.59% (486/498) | Non-Toxin |       |
| 44    | N Protein | DRB1*07:01            | 15     | Consensus (comb.lib./smm/nn) | GTWLTYTGAIKLDDK  | 0.58            | 0.58          | 97.59% (486/498) | Non-Toxin |       |
| 45    | N Protein | DRB1*11:01            | 15     | Consensus (smm/nn/sturniolo) | GYRRATRRIIRGGDG  | 0.42            | 0.42          | 97.59% (486/498) | Non-Toxin |       |
| 46    | N Protein | DRB1*09:01            | 15     | Consensus (comb.lib./smm/nn) | IAQFAPSASAFFGMS  | 0.01            | 0.01          | 97.59% (486/498) | Non-Toxin |       |
| 47    | N Protein | DRB1*11:01            | 15     | Consensus (smm/nn/sturniolo) | IGYYRRATRRIIRGGD | 0.42            | 0.42          | 97.59% (486/498) | Non-Toxin |       |
| 48    | N Protein | DQA1*01:02/DQB1*06:02 | 15     | Consensus (comb.lib./smm/nn) | NNAIVLQLPQGTTL   | 0.42            | 0.42          | 97.59% (486/498) | Non-Toxin |       |
| 49    | N Protein | DQA1*01:02/DQB1*06:02 | 15     | Consensus (comb.lib./smm/nn) | NPANNAIVLQLPQG   | 0.03            | 0.03          | 97.59% (486/498) | Non-Toxin |       |
| 50    | N Protein | DQA1*01:02/DQB1*06:02 | 15     | Consensus (comb.lib./smm/nn) | PANNAIVLQLPQGT   | 0.04            | 0.04          | 97.59% (486/498) | Non-Toxin |       |
| 51    | N Protein | DRB1*09:01            | 15     | Consensus (comb.lib./smm/nn) | PQIAQFAPSASAFFG  | 0.01            | 0.01          | 97.59% (486/498) | Non-Toxin |       |
| 52    | N Protein | DRB1*07:01            | 15     | Consensus (comb.lib./smm/nn) | PSGTWLTYTGAIKLD  | 0.58            | 0.58          | 97.59% (486/498) | Non-Toxin |       |
| 53    | N Protein | DRB1*09:01            | 15     | Consensus (comb.lib./smm/nn) | QIAQFAPSASAFFGM  | 0.01            | 0.01          | 97.59% (486/498) | Non-Toxin |       |
| 54    | N Protein | DRB1*11:01            | 15     | Consensus (smm/nn/sturniolo) | QIGYYRRATRRIIRGG | 0.39            | 0.39          | 97.59% (486/498) | Non-Toxin |       |
| 55    | N Protein | DRB5*01:01            | 15     | Consensus (smm/nn/sturniolo) | QIGYYRRATRRIIRGG | 0.58            | 0.58          | 97.59% (486/498) | Non-Toxin |       |
| 56    | N Protein | DQA1*01:02/DQB1*06:02 | 15     | Consensus (comb.lib./smm/nn) | RNPANNAIVLQLPQ   | 0.04            | 0.04          | 97.59% (486/498) | Non-Toxin |       |
| 57    | N Protein | DRB1*07:01            | 15     | Consensus (comb.lib./smm/nn) | SGTWLTYTGAIKLDD  | 0.58            | 0.58          | 97.59% (486/498) | Non-Toxin |       |
| 58    | N Protein | DRB1*07:01            | 15     | Consensus (comb.lib./smm/nn) | TPSGTWLTYTGAIKL  | 0.58            | 0.58          | 97.59% (486/498) | Non-Toxin |       |
| 59    | N Protein | DQA1*01:02/DQB1*06:02 | 15     | Consensus (comb.lib./smm/nn) | TRNPANNAIVLQLP   | 0.04            | 0.04          | 97.59% (486/498) | Non-Toxin |       |
| 60    | N Protein | DRB1*07:01            | 15     | Consensus (comb.lib./smm/nn) | TWLTYTGAIKLDDKD  | 0.58            | 0.58          | 97.59% (486/498) | Non-Toxin |       |
| 61    | N Protein | DRB1*09:01            | 15     | Consensus (comb.lib./smm/nn) | WPQIAQFAPSASAFF  | 0.01            | 0.01          | 97.59% (486/498) | Non-Toxin |       |
| S.No. | ORF       | Allele                | Length | Method used                  | Peptide          | Percentile Rank | Adjusted rank | Conservancy      | Toxicity  |       |
| 62    | ORF10     | DPA1*01/DPB1*04:01    | 15     | Consensus (comb.lib./smm)    | FAFPFTIYSLLLCRM  | 0.56            | 0.56          | 99.79% (478/479) | Non-Toxin |       |
| 63    | ORF10     | DPA1*02:01/DPB1*01:01 | 15     | Consensus (comb.lib./smm/nn) | FAFPFTIYSLLLCRM  | 1.1             | 1.1           | 99.79% (478/479) | Non-Toxin |       |
| 64    | ORF10     | DPA1*03:01/DPB1*04:02 | 15     | Consensus (comb.lib./smm/nn) | FAFPFTIYSLLLCRM  | 1.1             | 1.1           | 99.79% (478/479) | Non-Toxin |       |
| 65    | ORF10     | DPA1*01:03/DPB1*02:01 | 15     | Consensus (comb.lib./smm/nn) | INVFAFPFTIYSLLL  | 0.29            | 0.29          | 99.37% (476/479) | Non-Toxin |       |
| 66    | ORF10     | DPA1*01/DPB1*04:01    | 15     | Consensus (comb.lib./smm)    | INVFAFPFTIYSLLL  | 0.46            | 0.46          | 99.37% (476/479) | Non-Toxin |       |
| 67    | ORF10     | DPA1*02:01/DPB1*01:01 | 15     | Consensus (comb.lib./smm/nn) | INVFAFPFTIYSLLL  | 0.72            | 0.72          | 99.37% (476/479) | Non-Toxin |       |
| 68    | ORF10     | DPA1*01:03/DPB1*02:01 | 15     | Consensus (comb.lib./smm/nn) | NVFAFPFTIYSLLLC  | 0.4             | 0.4           | 99.58% (477/479) | Non-Toxin |       |
| 69    | ORF10     | DPA1*01/DPB1*04:01    | 15     | Consensus (comb.lib./smm)    | NVFAFPFTIYSLLLC  | 0.56            | 0.56          | 99.58% (477/479) | Non-Toxin |       |
| 70    | ORF10     | DPA1*02:01/DPB1*01:01 | 15     | Consensus (comb.lib./smm/nn) | NVFAFPFTIYSLLLC  | 0.69            | 0.69          | 99.58% (477/479) | Non-Toxin |       |
| 71    | ORF10     | DPA1*01/DPB1*04:01    | 15     | Consensus (comb.lib./smm)    | VFAFPFTIYSLLLCR  | 0.56            | 0.56          | 99.58% (477/479) | Non-Toxin |       |
| 72    | ORF10     | DPA1*02:01/DPB1*01:01 | 15     | Consensus (comb.lib./smm/nn) | VFAFPFTIYSLLLCR  | 0.66            | 0.66          | 99.58% (477/479) | Non-Toxin |       |
| 73    | ORF10     | DPA1*01:03/DPB1*02:01 | 15     | Consensus (comb.lib./smm/nn) | VFAFPFTIYSLLLCR  | 0.71            | 0.71          | 99.58% (477/479) | Non-Toxin |       |
| 74    | ORF10     | DPA1*03:01/DPB1*04:02 | 15     | Consensus (comb.lib./smm/nn) | VFAFPFTIYSLLLCR  | 1.1             | 1.1           | 99.58% (477/479) | Non-Toxin |       |
| 75    | ORF10     | DPA1*01:03/DPB1*02:01 | 15     | Consensus (comb.lib./smm/nn) | YINVFAPFTIYSL    | 0.29            | 0.29          | 99.37% (476/479) | Non-Toxin |       |
| S.No. | ORF       | Allele                | Length | Method used                  | Peptide          | Percentile Rank | Adjusted rank | Conservancy      | Toxicity  | NSP   |
| 76    | ORF1ab    | DPA1*01:03/DPB1*02:01 | 15     | Consensus (comb.lib./smm/nn) | AAIMQLFFSYFAVHF  | 0.05            | 0.05          | 100%(453/453)    | Non-Toxin | nsp3  |
| 77    | ORF1ab    | DQA1*01:02/DQB1*06:02 | 15     | Consensus (comb.lib./smm/nn) | AFASEAARVVRISIFS | 0.08            | 0.08          | 99.55%(451/453)  | Non-Toxin | nsp2  |
| 78    | ORF1ab    | DRB1*04:01            | 15     | Consensus (smm/nn/sturniolo) | AIASEFSSLPYAAF   | 0.13            | 0.13          | 99.33%(450/453)  | Non-Toxin | nsp8  |
| 79    | ORF1ab    | DRB1*09:01            | 15     | Consensus (comb.lib./smm/nn) | AILASFSASTSAFV   | 0.01            | 0.01          | 100%(453/453)    | Non-Toxin | nsp2  |
| 80    | ORF1ab    | DPA1*01:03/DPB1*02:01 | 15     | Consensus (comb.lib./smm/nn) | AIMQLFFSYFAVHFI  | 0.05            | 0.05          | 100%(453/453)    | Non-Toxin | nsp3  |
| 81    | ORF1ab    | DRB1*15:01            | 15     | Consensus (smm/nn/sturniolo) | AMPNMLRIMASLVLA  | 0.01            | 0.01          | 100%(453/453)    | Non-Toxin | nsp12 |
| 82    | ORF1ab    | DRB3*02:02            | 15     | NetMHCIIpan                  | ANYIFWRNTNPIQLS  | 0.05            | 0.05          | 98.89%(448/453)  | Non-Toxin | nsp16 |
| 83    | ORF1ab    | DRB1*04:01            | 15     | Consensus (smm/nn/sturniolo) | ASEFSSLPYAAFAT   | 0.12            | 0.12          | 99.33%(450/453)  | Non-Toxin | nsp8  |
| 84    | ORF1ab    | DQA1*05:01/DQB1*03:01 | 15     | Consensus (comb.lib./smm/nn) | ASIVAGGIVAVWTC   | 0.03            | 0.03          | 100%(453/453)    | Non-Toxin | nsp4  |
| 85    | ORF1ab    | DRB1*07:01            | 15     | Consensus (comb.lib./smm/nn) | AVGNICYTPSKLIEY  | 0.09            | 0.09          | 99.55%(451/453)  | Non-Toxin | nsp4  |
| 86    | ORF1ab    | DRB3*02:02            | 15     | NetMHCIIpan                  | AWWTFVFTNVNASSS  | 0.01            | 0.01          | 98.89%(448/453)  | Non-Toxin | nsp16 |
| 87    | ORF1ab    | DPA1*01:03/DPB1*02:01 | 15     | Consensus (comb.lib./smm/nn) | AYILFTRFFYVLGLA  | 0.01            | 0.01          | 100%(453/453)    | Non-Toxin | nsp3  |
| 88    | ORF1ab    | DPA1*01/DPB1*04:01    | 15     | Consensus (comb.lib./smm)    | AYILFTRFFYVLGLA  | 0.08            | 0.08          | 100%(453/453)    | Non-Toxin | nsp3  |
| 89    | ORF1ab    | DRB1*07:01            | 15     | Consensus (comb.lib./smm/nn) | CTFTRSTNSRIKASM  | 0.12            | 0.12          | 98.67%(447/453)  | Non-Toxin | nsp3  |
| 90    | ORF1ab    | DQA1*05:01/DQB1*03:01 | 15     | Consensus (comb.lib./smm/nn) | DISASIVAGGIVAV   | 0.03            | 0.03          | 100%(453/453)    | Non-Toxin | nsp4  |

|     |        |                       |    |                               |                  |      |      |                 |           |       |
|-----|--------|-----------------------|----|-------------------------------|------------------|------|------|-----------------|-----------|-------|
| 91  | ORF1ab | DPA1*03:01/DPB1*04:02 | 15 | Consensus (comb.lib./simm/nn) | EETKFLTENLLLYID  | 0.03 | 0.03 | 99.77%(452/453) | Non-Toxin | nsp3  |
| 92  | ORF1ab | DRB1*11:01            | 15 | Consensus (simm/nn/sturniolo) | EFYAYLRKHFSMMIL  | 0.05 | 0.05 | 100%(453/453)   | Non-Toxin | nsp12 |
| 93  | ORF1ab | DQA1*05:01/DQB1*02:01 | 15 | Consensus (comb.lib./simm/nn) | EIDFLELAMDEFIER  | 0.04 | 0.04 | 99.11%(449/453) | Non-Toxin | nsp15 |
| 94  | ORF1ab | DRB1*01:01            | 15 | Consensus (comb.lib./simm/nn) | ESPPVMMSSAPPAQYE | 0.01 | 0.01 | 100%(453/453)   | Non-Toxin | nsp3  |
| 95  | ORF1ab | DPA1*03:01/DPB1*04:02 | 15 | Consensus (comb.lib./simm/nn) | ETKFLTENLLLYIDI  | 0.03 | 0.03 | 99.77%(452/453) | Non-Toxin | nsp3  |
| 96  | ORF1ab | DRB1*13:02            | 15 | Consensus (simm/nn/sturniolo) | EVKILNNLGVDAIAN  | 0.12 | 0.12 | 99.77%(452/453) | Non-Toxin | nsp15 |
| 97  | ORF1ab | DPA1*01:03/DPB1*02:01 | 15 | Consensus (comb.lib./simm/nn) | EWFLAYILFTRFFYV  | 0.03 | 0.03 | 100%(453/453)   | Non-Toxin | nsp3  |
| 98  | ORF1ab | DRB3*02:02            | 15 | NetMHCIIpan                   | FAWWTAFVTNWNASS  | 0.01 | 0.01 | 98.89%(448/453) | Non-Toxin | nsp16 |
| 99  | ORF1ab | DQA1*01:01/DQB1*05:01 | 15 | Consensus (comb.lib./simm/nn) | FISNSWLMWLINLV   | 0.05 | 0.05 | 100%(453/453)   | Non-Toxin | nsp3  |
| 100 | ORF1ab | DPA1*01:03/DPB1*02:01 | 15 | Consensus (comb.lib./simm/nn) | FLAYILFTRFFYVLG  | 0.01 | 0.01 | 100%(453/453)   | Non-Toxin | nsp3  |
| 101 | ORF1ab | DPA1*02:01/DPB1*01:01 | 15 | Consensus (comb.lib./simm/nn) | FLAYILFTRFFYVLG  | 0.07 | 0.07 | 100%(453/453)   | Non-Toxin | nsp3  |
| 102 | ORF1ab | DPA1*01/DPB1*04:01    | 15 | Consensus (comb.lib./simm)    | FLAYILFTRFFYVLG  | 0.09 | 0.09 | 100%(453/453)   | Non-Toxin | nsp3  |
| 103 | ORF1ab | DPA1*01/DPB1*04:01    | 15 | Consensus (comb.lib./simm)    | FLFVAIIFYLITPVH  | 0.11 | 0.11 | 99.77%(452/453) | Non-Toxin | nsp4  |
| 104 | ORF1ab | DRB1*07:01            | 15 | Consensus (comb.lib./simm/nn) | FSAVGNICYTPSKLI  | 0.06 | 0.06 | 99.55%(451/453) | Non-Toxin | nsp4  |
| 105 | ORF1ab | DRB1*07:01            | 15 | Consensus (comb.lib./simm/nn) | FTPLVPFWITIAVII  | 0.03 | 0.03 | 100%(453/453)   | Non-Toxin | nsp4  |
| 106 | ORF1ab | DRB1*11:01            | 15 | Consensus (simm/nn/sturniolo) | FVNEFYAYLRKHFSM  | 0.11 | 0.11 | 100%(453/453)   | Non-Toxin | nsp12 |
| 107 | ORF1ab | DRB3*02:02            | 15 | NetMHCIIpan                   | HANYIFWRNTNPIQL  | 0.11 | 0.11 | 98.89%(448/453) | Non-Toxin | nsp16 |
| 108 | ORF1ab | DQA1*01:01/DQB1*05:01 | 15 | Consensus (comb.lib./simm/nn) | HFISNSWLMWLINLV  | 0.05 | 0.05 | 100%(453/453)   | Non-Toxin | nsp3  |
| 109 | ORF1ab | DRB1*04:01            | 15 | Consensus (simm/nn/sturniolo) | IASEFSSLPYAAFA   | 0.13 | 0.13 | 99.33%(450/453) | Non-Toxin | nsp8  |
| 110 | ORF1ab | DQA1*05:01/DQB1*02:01 | 15 | Consensus (comb.lib./simm/nn) | IDFLELAMDEFIER   | 0.05 | 0.05 | 99.33%(450/453) | Non-Toxin | nsp15 |
| 111 | ORF1ab | DRB1*09:01            | 15 | Consensus (comb.lib./simm/nn) | ILASFSASTSAFVE   | 0.01 | 0.01 | 100%(453/453)   | Non-Toxin | nsp2  |
| 112 | ORF1ab | DRB1*09:01            | 15 | Consensus (comb.lib./simm/nn) | ILASFSASTSAFVET  | 0.02 | 0.02 | 100%(453/453)   | Non-Toxin | nsp2  |
| 113 | ORF1ab | DPA1*01:03/DPB1*02:01 | 15 | Consensus (comb.lib./simm/nn) | ILFTRFFYVLGLAAI  | 0.11 | 0.11 | 100%(453/453)   | Non-Toxin | nsp3  |
| 114 | ORF1ab | DPA1*01:03/DPB1*02:01 | 15 | Consensus (comb.lib./simm/nn) | IMQLFFSYFAVHFIS  | 0.05 | 0.05 | 100%(453/453)   | Non-Toxin | nsp3  |
| 115 | ORF1ab | DQA1*05:01/DQB1*03:01 | 15 | Consensus (comb.lib./simm/nn) | ISASIVAGGIVAIVV  | 0.03 | 0.03 | 100%(453/453)   | Non-Toxin | nsp4  |
| 116 | ORF1ab | DQA1*01:01/DQB1*05:01 | 15 | Consensus (comb.lib./simm/nn) | ISNSWLMWLINLVQ   | 0.07 | 0.07 | 100%(453/453)   | Non-Toxin | nsp3  |
| 117 | ORF1ab | DPA1*03:01/DPB1*04:02 | 15 | Consensus (comb.lib./simm/nn) | KLINIIWFLLLSVC   | 0.09 | 0.09 | 97.79%(443/453) | Non-Toxin | nsp3  |
| 118 | ORF1ab | DPA1*02:01/DPB1*05:01 | 15 | Consensus (comb.lib./simm/nn) | KQLIKVTLVFLFVAA  | 0.13 | 0.13 | 99.77%(452/453) | Non-Toxin | nsp4  |
| 119 | ORF1ab | DPA1*02:01/DPB1*05:01 | 15 | Consensus (comb.lib./simm/nn) | KVTLVFLFVAIIFYL  | 0.04 | 0.04 | 99.77%(452/453) | Non-Toxin | nsp4  |
| 120 | ORF1ab | DPA1*01:03/DPB1*02:01 | 15 | Consensus (comb.lib./simm/nn) | LAAMQLFFSYFAVH   | 0.07 | 0.07 | 100%(453/453)   | Non-Toxin | nsp3  |
| 121 | ORF1ab | DPA1*01:03/DPB1*02:01 | 15 | Consensus (comb.lib./simm/nn) | LAYILFTRFFYVLGL  | 0.01 | 0.01 | 100%(453/453)   | Non-Toxin | nsp3  |
| 122 | ORF1ab | DPA1*01/DPB1*04:01    | 15 | Consensus (comb.lib./simm)    | LAYILFTRFFYVLGL  | 0.08 | 0.08 | 100%(453/453)   | Non-Toxin | nsp3  |
| 123 | ORF1ab | DRB1*07:01            | 15 | Consensus (comb.lib./simm/nn) | LCTFTRSTNSRIKAS  | 0.12 | 0.12 | 99.11%(449/453) | Non-Toxin | nsp3  |
| 124 | ORF1ab | DPA1*03:01/DPB1*04:02 | 15 | Consensus (comb.lib./simm/nn) | LEETKFLTENLLLYI  | 0.03 | 0.03 | 99.77%(452/453) | Non-Toxin | nsp3  |
| 125 | ORF1ab | DPA1*03:01/DPB1*04:02 | 15 | Consensus (comb.lib./simm/nn) | LINIIWFLLLSVCL   | 0.09 | 0.09 | 97.79%(443/453) | Non-Toxin | nsp3  |
| 126 | ORF1ab | DPA1*02:01/DPB1*05:01 | 15 | Consensus (comb.lib./simm/nn) | LKQLIKVTLVFLFVA  | 0.13 | 0.13 | 99.77%(452/453) | Non-Toxin | nsp4  |
| 127 | ORF1ab | DRB1*07:01            | 15 | Consensus (comb.lib./simm/nn) | LLQLCTFTRSTNSRI  | 0.12 | 0.12 | 98.89%(448/453) | Non-Toxin | nsp3  |
| 128 | ORF1ab | DRB1*07:01            | 15 | Consensus (comb.lib./simm/nn) | LQLCTFTRSTNSRIK  | 0.12 | 0.12 | 98.89%(448/453) | Non-Toxin | nsp3  |
| 129 | ORF1ab | DPA1*01/DPB1*04:01    | 15 | Consensus (comb.lib./simm)    | LVFLFVAIIFYLITP  | 0.11 | 0.11 | 99.77%(452/453) | Non-Toxin | nsp4  |
| 130 | ORF1ab | DRB1*07:01            | 15 | Consensus (comb.lib./simm/nn) | LVPFWITIAIICIS   | 0.03 | 0.03 | 100%(453/453)   | Non-Toxin | nsp4  |
| 131 | ORF1ab | DQA1*05:01/DQB1*02:01 | 15 | Consensus (comb.lib./simm/nn) | MEIDFLELAMDEFIE  | 0.04 | 0.04 | 99.11%(449/453) | Non-Toxin | nsp15 |
| 132 | ORF1ab | DPA1*02:01/DPB1*14:01 | 15 | NetMHCIIpan                   | MNLKYAISAKNRART  | 0.08 | 0.08 | 99.77%(452/453) | Non-Toxin | nsp12 |
| 133 | ORF1ab | DRB1*15:01            | 15 | Consensus (simm/nn/sturniolo) | MPNMLRIMASLVLAR  | 0.01 | 0.01 | 100%(453/453)   | Non-Toxin | nsp12 |
| 134 | ORF1ab | DPA1*01:03/DPB1*02:01 | 15 | Consensus (comb.lib./simm/nn) | MQLFFSYFAVHFISN  | 0.05 | 0.05 | 100%(453/453)   | Non-Toxin | nsp3  |
| 135 | ORF1ab | DPA1*01:03/DPB1*02:01 | 15 | Consensus (comb.lib./simm/nn) | MYIFFASFYVWKSYS  | 0.04 | 0.04 | 99.11%(449/453) | Non-Toxin | nsp3  |
| 136 | ORF1ab | DRB1*11:01            | 15 | Consensus (simm/nn/sturniolo) | NEFYAYLRKHFSMMI  | 0.02 | 0.02 | 100%(453/453)   | Non-Toxin | nsp12 |
| 137 | ORF1ab | DRB1*15:01            | 15 | Consensus (simm/nn/sturniolo) | NMLRIMASLVLARKH  | 0.01 | 0.01 | 100%(453/453)   | Non-Toxin | nsp12 |
| 138 | ORF1ab | DQA1*01:01/DQB1*05:01 | 15 | Consensus (comb.lib./simm/nn) | NSWLMWLINLVQMA   | 0.1  | 0.1  | 100%(453/453)   | Non-Toxin | nsp3  |
| 139 | ORF1ab | DRB3*02:02            | 15 | NetMHCIIpan                   | NYIFWRNTNPIQLSS  | 0.04 | 0.04 | 98.89%(448/453) | Non-Toxin | nsp16 |
| 140 | ORF1ab | DRB1*13:02            | 15 | Consensus (simm/nn/sturniolo) | PEVKILNNLGVDAIA  | 0.12 | 0.12 | 99.77%(452/453) | Non-Toxin | nsp15 |
| 141 | ORF1ab | DRB1*07:01            | 15 | Consensus (comb.lib./simm/nn) | PLVPFWITIAIICI   | 0.02 | 0.02 | 100%(453/453)   | Non-Toxin | nsp4  |

| 142   | ORF1ab | DRB1*15:01            | 15     | Consensus (smm/nn/sturniolo) | PNMLRIMASLVLRK   | 0.01            | 0.01          | 100%(453/453)   | Non-Toxin | nsp12 |
|-------|--------|-----------------------|--------|------------------------------|------------------|-----------------|---------------|-----------------|-----------|-------|
| 143   | ORF1ab | DRB1*04:01            | 15     | Consensus (smm/nn/sturniolo) | QAIASEFSSLSYAA   | 0.13            | 0.13          | 99.33%(450/453) | Non-Toxin | nsp8  |
| 144   | ORF1ab | DRB1*01:01            | 15     | Consensus (comb.lib./smm/nn) | QESPFVMSAPPAQY   | 0.01            | 0.01          | 100%(453/453)   | Non-Toxin | nsp3  |
| 145   | ORF1ab | DRB1*07:01            | 15     | Consensus (comb.lib./smm/nn) | QLCTFTRSTNSRIKA  | 0.12            | 0.12          | 98.67%(447/453) | Non-Toxin | nsp3  |
| 146   | ORF1ab | DQA1*05:01/DQB1*02:01 | 15     | Consensus (comb.lib./smm/nn) | QMEIDFLELAMDEFI  | 0.03            | 0.03          | 99.11%(449/453) | Non-Toxin | nsp15 |
| 147   | ORF1ab | DPA1*02:01/DPB1*14:01 | 15     | NetMHCIIpan                  | QMNLKYAISAKNRAR  | 0.07            | 0.07          | 99.77%(452/453) | Non-Toxin | nsp12 |
| 148   | ORF1ab | DRB1*01:01            | 15     | Consensus (comb.lib./smm/nn) | QQESPFVMSAPPAQ   | 0.1             | 0.1           | 99.77%(452/453) | Non-Toxin | nsp3  |
| 149   | ORF1ab | DQA1*01:01/DQB1*05:01 | 15     | Consensus (comb.lib./smm/nn) | QSTQWSLFFFLYENA  | 0.1             | 0.1           | 92.27%(418/453) | Non-Toxin | nsp6  |
| 150   | ORF1ab | DPA1*01:03/DPB1*02:01 | 15     | Consensus (comb.lib./smm/nn) | QWSLFFFLYENAFNP  | 0.04            | 0.04          | 92.27%(418/453) | Non-Toxin | nsp6  |
| 151   | ORF1ab | DRB1*15:01            | 15     | Consensus (smm/nn/sturniolo) | RAMPNMLRIMASLVL  | 0.01            | 0.01          | 100%(453/453)   | Non-Toxin | nsp12 |
| 152   | ORF1ab | DPA1*01:03/DPB1*02:01 | 15     | Consensus (comb.lib./smm/nn) | RMYYFASFYYVWKS   | 0.04            | 0.04          | 99.11%(449/453) | Non-Toxin | nsp3  |
| 153   | ORF1ab | DQA1*05:01/DQB1*03:01 | 15     | Consensus (comb.lib./smm/nn) | SASIVAGGIVAVVT   | 0.03            | 0.03          | 100%(453/453)   | Non-Toxin | nsp4  |
| 154   | ORF1ab | DRB1*07:01            | 15     | Consensus (comb.lib./smm/nn) | SAVGNICYTPSKLIE  | 0.09            | 0.09          | 99.55%(451/453) | Non-Toxin | nsp4  |
| 155   | ORF1ab | DQA1*05:01/DQB1*03:01 | 15     | Consensus (comb.lib./smm/nn) | SIVAGGIVAVVTCL   | 0.03            | 0.03          | 100%(453/453)   | Non-Toxin | nsp4  |
| 156   | ORF1ab | DPA1*03:01/DPB1*04:02 | 15     | Consensus (comb.lib./smm/nn) | SKLINIIWFLLLSV   | 0.09            | 0.09          | 97.79%(443/453) | Non-Toxin | nsp3  |
| 157   | ORF1ab | DQA1*01:01/DQB1*05:01 | 15     | Consensus (comb.lib./smm/nn) | SNSWLMLIINLVQM   | 0.07            | 0.07          | 100%(453/453)   | Non-Toxin | nsp3  |
| 158   | ORF1ab | DRB1*01:01            | 15     | Consensus (comb.lib./smm/nn) | SPFVMSAPPAQYEL   | 0.01            | 0.01          | 100%(453/453)   | Non-Toxin | nsp3  |
| 159   | ORF1ab | DQA1*05:01/DQB1*02:01 | 15     | Consensus (comb.lib./smm/nn) | SQMEIDFLELAMDEF  | 0.05            | 0.05          | 99.11%(449/453) | Non-Toxin | nsp15 |
| 160   | ORF1ab | DPA1*01:03/DPB1*02:01 | 15     | Consensus (comb.lib./smm/nn) | STQWSLFFFLYENAF  | 0.05            | 0.05          | 92.27%(418/453) | Non-Toxin | nsp6  |
| 161   | ORF1ab | DQA1*01:01/DQB1*05:01 | 15     | Consensus (comb.lib./smm/nn) | STQWSLFFFLYENAF  | 0.1             | 0.1           | 92.27%(418/453) | Non-Toxin | nsp6  |
| 162   | ORF1ab | DPA1*03:01/DPB1*04:02 | 15     | Consensus (comb.lib./smm/nn) | TKFLTENLLLYIDIN  | 0.05            | 0.05          | 99.77%(452/453) | Non-Toxin | nsp3  |
| 163   | ORF1ab | DPA1*03:01/DPB1*04:02 | 15     | Consensus (comb.lib./smm/nn) | TLEETKFLTENLLLY  | 0.05            | 0.05          | 99.77%(452/453) | Non-Toxin | nsp3  |
| 164   | ORF1ab | DPA1*01/DPB1*04:01    | 15     | Consensus (comb.lib./smm)    | TLVFLFVAIIFYLIT  | 0.11            | 0.11          | 99.77%(452/453) | Non-Toxin | nsp4  |
| 165   | ORF1ab | DRB1*07:01            | 15     | Consensus (comb.lib./smm/nn) | TPLVPFWITAIYIIC  | 0.03            | 0.03          | 100%(453/453)   | Non-Toxin | nsp4  |
| 166   | ORF1ab | DPA1*02:01/DPB1*14:01 | 15     | NetMHCIIpan                  | TQMNLKYAISAKNRA  | 0.11            | 0.11          | 99.77%(452/453) | Non-Toxin | nsp12 |
| 167   | ORF1ab | DPA1*01:03/DPB1*02:01 | 15     | Consensus (comb.lib./smm/nn) | TQWSLFFFLYENAFN  | 0.04            | 0.04          | 92.27%(418/453) | Non-Toxin | nsp6  |
| 168   | ORF1ab | DQA1*01:01/DQB1*05:01 | 15     | Consensus (comb.lib./smm/nn) | TQWSLFFFLYENAFN  | 0.09            | 0.09          | 92.27%(418/453) | Non-Toxin | nsp6  |
| 169   | ORF1ab | DPA1*01/DPB1*04:01    | 15     | Consensus (comb.lib./smm)    | VFLFVAIIFYLITPV  | 0.11            | 0.11          | 99.77%(452/453) | Non-Toxin | nsp4  |
| 170   | ORF1ab | DRB1*07:01            | 15     | Consensus (comb.lib./smm/nn) | VGNICYTPSKLIEYT  | 0.13            | 0.13          | 99.77%(452/453) | Non-Toxin | nsp4  |
| 171   | ORF1ab | DRB1*11:01            | 15     | Consensus (smm/nn/sturniolo) | VNEFYAYLRKHFSSMM | 0.05            | 0.05          | 100%(453/453)   | Non-Toxin | nsp12 |
| 172   | ORF1ab | DRB1*07:01            | 15     | Consensus (comb.lib./smm/nn) | VPFWITAIYIICIST  | 0.03            | 0.03          | 100%(453/453)   | Non-Toxin | nsp4  |
| 173   | ORF1ab | DRB1*01:01            | 15     | Consensus (comb.lib./smm/nn) | VQQESPFVMSAPPA   | 0.1             | 0.1           | 99.77%(452/453) | Non-Toxin | nsp3  |
| 174   | ORF1ab | DQA1*01:01/DQB1*05:01 | 15     | Consensus (comb.lib./smm/nn) | VQSTQWSLFFFLYEN  | 0.11            | 0.11          | 92.27%(418/453) | Non-Toxin | nsp6  |
| 175   | ORF1ab | DPA1*01:03/DPB1*02:01 | 15     | Consensus (comb.lib./smm/nn) | VRMYIFFASFYYVWK  | 0.03            | 0.03          | 98.45%(446/453) | Non-Toxin | nsp3  |
| 176   | ORF1ab | DRB1*15:01            | 15     | Consensus (smm/nn/sturniolo) | VRMYIFFASFYYVWK  | 0.1             | 0.1           | 98.45%(446/453) | Non-Toxin | nsp3  |
| 177   | ORF1ab | DPA1*01/DPB1*04:01    | 15     | Consensus (comb.lib./smm)    | WTLVFLFVAIIFYLI  | 0.11            | 0.11          | 99.77%(452/453) | Non-Toxin | nsp4  |
| 178   | ORF1ab | DPA1*01:03/DPB1*02:01 | 15     | Consensus (comb.lib./smm/nn) | WFLAYILFTRFFYYL  | 0.01            | 0.01          | 100%(453/453)   | Non-Toxin | nsp3  |
| 179   | ORF1ab | DPA1*02:01/DPB1*01:01 | 15     | Consensus (comb.lib./smm/nn) | WFLAYILFTRFFYYL  | 0.06            | 0.06          | 100%(453/453)   | Non-Toxin | nsp3  |
| 180   | ORF1ab | DPA1*01/DPB1*04:01    | 15     | Consensus (comb.lib./smm)    | WFLAYILFTRFFYYL  | 0.08            | 0.08          | 100%(453/453)   | Non-Toxin | nsp3  |
| 181   | ORF1ab | DPA1*02:01/DPB1*05:01 | 15     | Consensus (comb.lib./smm/nn) | WLKQLIKVTLVFLV   | 0.13            | 0.13          | 99.77%(452/453) | Non-Toxin | nsp4  |
| 182   | ORF1ab | DQA1*01:02/DQB1*06:02 | 15     | Consensus (comb.lib./smm/nn) | YAFASEAARVRSIF   | 0.08            | 0.08          | 99.77%(452/453) | Non-Toxin | nsp2  |
| 183   | ORF1ab | DPA1*01:03/DPB1*02:01 | 15     | Consensus (comb.lib./smm/nn) | YIFASFYYVWKSIV   | 0.05            | 0.05          | 99.55%(451/453) | Non-Toxin | nsp3  |
| 184   | ORF1ab | DRB3*02:02            | 15     | NetMHCIIpan                  | YIFWRNTNPIQLSSY  | 0.05            | 0.05          | 98.89%(448/453) | Non-Toxin | nsp16 |
| 185   | ORF1ab | DPA1*01:03/DPB1*02:01 | 15     | Consensus (comb.lib./smm/nn) | YILFTRFFYYLGLAA  | 0.08            | 0.08          | 100%(453/453)   | Non-Toxin | nsp3  |
| S.No. | ORF    | Allele                | Length | Method used                  | Peptide          | Percentile Rank | Adjusted rank | Conservancy     | Toxicity  |       |
| 186   | ORF3a  | DPA1*01/DPB1*04:01    | 15     | Consensus (comb.lib./smm)    | APFLYALYVFLQS    | 0.12            | 0.12          | 96.88%(466/481) | Non-Toxin |       |
| 187   | ORF3a  | DPA1*02:01/DPB1*14:01 | 15     | NetMHCIIpan                  | DFVRATATPIQASL   | 0.12            | 0.12          | 99.37%(478/481) | Non-Toxin |       |
| 188   | ORF3a  | DPA1*01:03/DPB1*02:01 | 15     | Consensus (comb.lib./smm/nn) | DTGVEHVTFPIYNKI  | 1.1             | 1.1           | 99.37%(478/481) | Non-Toxin |       |
| 189   | ORF3a  | DPA1*02:01/DPB1*05:01 | 15     | Consensus (comb.lib./smm/nn) | DTGVEHVTFPIYNKI  | 1.6             | 1.6           | 99.37%(478/481) | Non-Toxin |       |
| 190   | ORF3a  | DRB1*04:05            | 15     | Consensus (smm/nn/sturniolo) | FFIYNKIVDEPEEHV  | 0.94            | 0.94          | 99.58%(479/481) | Non-Toxin |       |
| 191   | ORF3a  | DPA1*01/DPB1*04:01    | 15     | Consensus (comb.lib./smm)    | FLYLYALVYFLQSN   | 0.12            | 0.12          | 96.67%(465/481) | Non-Toxin |       |

|       |       |                       |        |                              |                  |                 |               |                  |           |  |
|-------|-------|-----------------------|--------|------------------------------|------------------|-----------------|---------------|------------------|-----------|--|
| 192   | ORF3a | DPA1*02:01/DPB1*14:01 | 15     | NetMHCIIpan                  | FVRATATIPIQASLP  | 0.12            | 0.12          | 99.37%(478/481)  | Non-Toxin |  |
| 193   | ORF3a | DPA1*01:03/DPB1*02:01 | 15     | Consensus (comb.lib./smm/nn) | GVEHVTFYFNKIVD   | 1.2             | 1.2           | 99.37%(478/481)  | Non-Toxin |  |
| 194   | ORF3a | DRB1*04:05            | 15     | Consensus (smm/nn/sturniolo) | HVTFFIYNKIVDEPE  | 0.84            | 0.84          | 99.58%(479/481)  | Non-Toxin |  |
| 195   | ORF3a | DRB1*01:01            | 15     | Consensus (comb.lib./smm/nn) | LLFVTVYSHLLLVA   | 0.1             | 0.1           | 97.08%(467/481)  | Non-Toxin |  |
| 196   | ORF3a | DPA1*01/DPB1*04:01    | 15     | Consensus (comb.lib./smm)    | LYLYALVYFLQSINF  | 0.12            | 0.12          | 96.46%(464/481)  | Non-Toxin |  |
| 197   | ORF3a | DPA1*01/DPB1*04:01    | 15     | Consensus (comb.lib./smm)    | PFLYLYALVYFLQSI  | 0.12            | 0.12          | 96.67%(465/481)  | Non-Toxin |  |
| 198   | ORF3a | DPA1*02:01/DPB1*14:01 | 15     | NetMHCIIpan                  | SDFVRATATIPIQAS  | 0.12            | 0.12          | 99.37%(478/481)  | Non-Toxin |  |
| 199   | ORF3a | DRB1*04:05            | 15     | Consensus (smm/nn/sturniolo) | TFFIYNKIVDEPEEH  | 0.81            | 0.81          | 99.58%(479/481)  | Non-Toxin |  |
| 200   | ORF3a | DPA1*01:03/DPB1*02:01 | 15     | Consensus (comb.lib./smm/nn) | TGVEHVTFYFNKIV   | 0.93            | 0.93          | 99.37%(478/481)  | Non-Toxin |  |
| 201   | ORF3a | DPA1*02:01/DPB1*05:01 | 15     | Consensus (comb.lib./smm/nn) | TGVEHVTFYFNKIV   | 1.4             | 1.4           | 99.37%(478/481)  | Non-Toxin |  |
| 202   | ORF3a | DRB1*04:05            | 15     | Consensus (smm/nn/sturniolo) | VTFYFNKIVDEPEE   | 0.81            | 0.81          | 99.58%(479/481)  | Non-Toxin |  |
| 203   | ORF3a | DPA1*01/DPB1*04:01    | 15     | Consensus (comb.lib./smm)    | YLYALVYFLQSINFV  | 0.14            | 0.14          | 96.46%(464/481)  | Non-Toxin |  |
| S.No. | ORF   | Allele                | Length | Method used                  | Peptide          | Percentile Rank | Adjusted rank | Conservancy      | Toxicity  |  |
| 204   | ORF6  | DRB1*15:01            | 15     | Consensus (smm/nn/sturniolo) | EILLIIMRTFKVSIW  | 0.1             | 0.1           | 99.58% (479/481) | Non-Toxin |  |
| 205   | ORF6  | DQA1*01:01/DQB1*05:01 | 15     | Consensus (comb.lib./smm/nn) | FKVSIWNLDYIINLI  | 0.02            | 0.02          | 99.38% (478/481) | Non-Toxin |  |
| 206   | ORF6  | DRB1*15:01            | 15     | Consensus (smm/nn/sturniolo) | ILLIIMRTFKVSIWN  | 0.1             | 0.1           | 99.38% (478/481) | Non-Toxin |  |
| 207   | ORF6  | DQA1*01:01/DQB1*05:01 | 15     | Consensus (comb.lib./smm/nn) | KVSIWNLDYIINLI   | 0.02            | 0.02          | 99.38% (478/481) | Non-Toxin |  |
| 208   | ORF6  | DQA1*01:01/DQB1*05:01 | 15     | Consensus (comb.lib./smm/nn) | TFKYSIWNLDYIINL  | 0.02            | 0.02          | 99.38% (478/481) | Non-Toxin |  |
| 209   | ORF6  | DQA1*01:01/DQB1*05:01 | 15     | Consensus (comb.lib./smm/nn) | VSIWNLDYIINLIK   | 0.05            | 0.05          | 99.38% (478/481) | Non-Toxin |  |
|       | ORF   | Allele                | Length | Method used                  | Peptide          | Percentile Rank | Adjusted rank | Conservancy      | Toxicity  |  |
| 210   | ORF7a | DRB1*01:01            | 15     | Consensus (comb.lib./smm/nn) | IILFLALITLATCEL  | 0.16            | 0.16          | 99.79% (479/480) | Non-Toxin |  |
| 211   | ORF7a | DRB1*01:01            | 15     | Consensus (comb.lib./smm/nn) | ILFLALITLATCELY  | 0.16            | 0.16          | 99.79% (479/480) | Non-Toxin |  |
| 212   | ORF7a | DRB1*01:01            | 15     | Consensus (comb.lib./smm/nn) | KIILFLALITLATCE  | 0.16            | 0.16          | 99.58% (478/480) | Non-Toxin |  |
| 213   | ORF7a | DRB1*01:01            | 15     | Consensus (comb.lib./smm/nn) | MKIIILFLALITLATC | 0.16            | 0.16          | 99.58% (478/480) | Non-Toxin |  |
| 214   | ORF7a | DPA1*03:01/DPB1*04:02 | 15     | Consensus (comb.lib./smm/nn) | MKIIILFLALITLATC | 0.39            | 0.39          | 99.58% (478/480) | Non-Toxin |  |
| S.No. | ORF   | Allele                | Length | Method used                  | Peptide          | Percentile Rank | Adjusted rank | Conservancy      | Toxicity  |  |
| 215   | ORF7b | DRB4*01:01            | 15     | Consensus (comb.lib./smm/nn) | AFLFLVLIIMLIIFW  | 0.14            | 0.14          | 99.58% (235/236) | Non-Toxin |  |
| 216   | ORF7b | DPA1*03:01/DPB1*04:02 | 15     | Consensus (comb.lib./smm/nn) | CFLAFLFLVLIIMLI  | 0.03            | 0.03          | 97.88% (231/236) | Non-Toxin |  |
| 217   | ORF7b | DPA1*01:03/DPB1*02:01 | 15     | Consensus (comb.lib./smm/nn) | CFLAFLFLVLIIMLI  | 0.08            | 0.08          | 97.88% (231/236) | Non-Toxin |  |
| 218   | ORF7b | DPA1*01/DPB1*04:01    | 15     | Consensus (comb.lib./smm)    | CFLAFLFLVLIIMLI  | 0.11            | 0.11          | 97.88% (231/236) | Non-Toxin |  |
| 219   | ORF7b | DPA1*03:01/DPB1*04:02 | 15     | Consensus (comb.lib./smm/nn) | DFYLCFLAFLFLVLI  | 0.03            | 0.03          | 98.31% (232/236) | Non-Toxin |  |
| 220   | ORF7b | DPA1*01:03/DPB1*02:01 | 15     | Consensus (comb.lib./smm/nn) | DFYLCFLAFLFLVLI  | 0.08            | 0.08          | 98.31% (232/236) | Non-Toxin |  |
| 221   | ORF7b | DPA1*01/DPB1*04:01    | 15     | Consensus (comb.lib./smm)    | DFYLCFLAFLFLVLI  | 0.09            | 0.09          | 98.31% (232/236) | Non-Toxin |  |
| 222   | ORF7b | DPA1*03:01/DPB1*04:02 | 15     | Consensus (comb.lib./smm/nn) | FLAFLFLVLIIMLI   | 0.06            | 0.06          | 97.88% (231/236) | Non-Toxin |  |
| 223   | ORF7b | DRB4*01:01            | 15     | Consensus (comb.lib./smm/nn) | FLAFLFLVLIIMLI   | 0.14            | 0.14          | 97.88% (231/236) | Non-Toxin |  |
| 224   | ORF7b | DRB4*01:01            | 15     | Consensus (comb.lib./smm/nn) | FLFLVLIIMLIIFWF  | 0.19            | 0.19          | 99.58% (235/236) | Non-Toxin |  |
| 225   | ORF7b | DPA1*03:01/DPB1*04:02 | 15     | Consensus (comb.lib./smm/nn) | FYLCFLAFLFLVLI   | 0.03            | 0.03          | 97.88% (231/236) | Non-Toxin |  |
| 226   | ORF7b | DPA1*01:03/DPB1*02:01 | 15     | Consensus (comb.lib./smm/nn) | FYLCFLAFLFLVLI   | 0.06            | 0.06          | 97.88% (231/236) | Non-Toxin |  |
| 227   | ORF7b | DPA1*01/DPB1*04:01    | 15     | Consensus (comb.lib./smm)    | FYLCFLAFLFLVLI   | 0.09            | 0.09          | 97.88% (231/236) | Non-Toxin |  |
| 228   | ORF7b | DPA1*01:03/DPB1*02:01 | 15     | Consensus (comb.lib./smm/nn) | IDFYLCFLAFLFLV   | 0.06            | 0.06          | 98.31% (232/236) | Non-Toxin |  |
| 229   | ORF7b | DPA1*03:01/DPB1*04:02 | 15     | Consensus (comb.lib./smm/nn) | IDFYLCFLAFLFLV   | 0.16            | 0.16          | 98.31% (232/236) | Non-Toxin |  |
| 230   | ORF7b | DPA1*03:01/DPB1*04:02 | 15     | Consensus (comb.lib./smm/nn) | LAFLFLVLIIMLIIF  | 0.08            | 0.08          | 99.58% (235/236) | Non-Toxin |  |
| 231   | ORF7b | DRB4*01:01            | 15     | Consensus (comb.lib./smm/nn) | LAFLFLVLIIMLIIF  | 0.12            | 0.12          | 99.58% (235/236) | Non-Toxin |  |
| 232   | ORF7b | DPA1*03:01/DPB1*04:02 | 15     | Consensus (comb.lib./smm/nn) | LCFLAFLFLVLIIML  | 0.02            | 0.02          | 97.88% (231/236) | Non-Toxin |  |
| 233   | ORF7b | DPA1*01:03/DPB1*02:01 | 15     | Consensus (comb.lib./smm/nn) | LCFLAFLFLVLIIML  | 0.06            | 0.06          | 97.88% (231/236) | Non-Toxin |  |
| 234   | ORF7b | DPA1*01/DPB1*04:01    | 15     | Consensus (comb.lib./smm)    | LCFLAFLFLVLIIML  | 0.09            | 0.09          | 97.88% (231/236) | Non-Toxin |  |
| 235   | ORF7b | DPA1*01:03/DPB1*02:01 | 15     | Consensus (comb.lib./smm/nn) | LIDFYLCFLAFLFL   | 0.05            | 0.05          | 98.31% (232/236) | Non-Toxin |  |
| 236   | ORF7b | DPA1*01:03/DPB1*02:01 | 15     | Consensus (comb.lib./smm/nn) | LSLIDFYLCFLAFL   | 0.15            | 0.15          | 98.31% (232/236) | Non-Toxin |  |
| 237   | ORF7b | DQA1*01:01/DQB1*05:01 | 15     | Consensus (comb.lib./smm/nn) | LVIIMLIIFWFSLEL  | 0.14            | 0.14          | 99.58% (235/236) | Non-Toxin |  |
| 238   | ORF7b | DPA1*01:03/DPB1*02:01 | 15     | Consensus (comb.lib./smm/nn) | SLIDFYLCFLAFLFL  | 0.07            | 0.07          | 98.31% (232/236) | Non-Toxin |  |
| 239   | ORF7b | DPA1*03:01/DPB1*04:02 | 15     | Consensus (comb.lib./smm/nn) | YLCFLAFLFLVLIIM  | 0.02            | 0.02          | 97.88% (231/236) | Non-Toxin |  |



| 240   | ORF7b     | DPA1*01:03/DPB1*02:01 | 15     | Consensus (comb.lib./smm/nn) | YLCFLAFLFLVLIM   | 0.06            | 0.06          | 97.88% (231/236) | Non-Toxin |
|-------|-----------|-----------------------|--------|------------------------------|------------------|-----------------|---------------|------------------|-----------|
| 241   | ORF7b     | DPA1*01/DPB1*04:01    | 15     | Consensus (comb.lib./smm)    | YLCFLAFLFLVLIM   | 0.09            | 0.09          | 97.88% (231/236) | Non-Toxin |
| S.No. | ORF       | Allele                | Length | Method used                  | Peptide          | Percentile Rank | Adjusted rank | Conservancy      | Toxicity  |
| 242   | ORF8      | DRB3*01:01            | 15     | Consensus (comb.lib./smm/nn) | CTQHQPYYVDDPCPI  | 0.08            | 0.08          | 99.17% (476/480) | Non-Toxin |
| 243   | ORF8      | DRB3*01:01            | 15     | Consensus (comb.lib./smm/nn) | HQPYYVDDPCPIHFY  | 0.08            | 0.08          | 99.17% (476/480) | Non-Toxin |
| 244   | ORF8      | DQA1*01:01/DQB1*05:01 | 15     | Consensus (comb.lib./smm/nn) | LVRCSFYEDFLEYH   | 0.45            | 0.45          | 99.58% (478/480) | Non-Toxin |
| 245   | ORF8      | DRB3*01:01            | 15     | Consensus (comb.lib./smm/nn) | QHQPYYVDDPCPIHF  | 0.08            | 0.08          | 99.17% (476/480) | Non-Toxin |
| 246   | ORF8      | DRB3*01:01            | 15     | Consensus (comb.lib./smm/nn) | QPYVVDPCPIHFYS   | 0.07            | 0.07          | 99.17% (476/480) | Non-Toxin |
| 247   | ORF8      | DRB3*01:01            | 15     | Consensus (comb.lib./smm/nn) | TQHQPYYVDDPCPIH  | 0.08            | 0.08          | 99.17% (476/480) | Non-Toxin |
| S.No. | ORF       | Allele                | Length | Method used                  | Peptide          | Percentile Rank | Adjusted rank | Conservancy      | Toxicity  |
| 248   | S protein | DRB3*01:01            | 15     | Consensus (comb.lib./smm/nn) | ADSFVIRGDEVQRQIA | 0.49            | 0.49          | 93.63% (470/502) | Non-Toxin |
| 249   | S protein | DRB3*02:02            | 15     | NetMHCIIpan                  | ADYSVLVNSASFSTF  | 0.85            | 0.85          | 93.82% (471/502) | Non-Toxin |
| 250   | S protein | DQA1*01:02/DQB1*06:02 | 15     | Consensus (comb.lib./smm/nn) | AGLIAIVMVTIMLCC  | 1.7             | 1.7           | 93.82% (471/502) | Non-Toxin |
| 251   | S protein | DRB1*07:01            | 15     | Consensus (comb.lib./smm/nn) | AIPNFTISVTTEIL   | 0.4             | 0.4           | 93.82% (471/502) | Non-Toxin |
| 252   | S protein | DRB1*15:01            | 15     | Consensus (smm/nn/sturniolo) | CSNLLQYGSFCTQL   | 0.58            | 0.58          | 93.82% (471/502) | Non-Toxin |
| 253   | S protein | DRB3*01:01            | 15     | Consensus (comb.lib./smm/nn) | DSFVIRGDEVQRQIAP | 0.51            | 0.51          | 93.63% (470/502) | Non-Toxin |
| 254   | S protein | DRB3*02:02            | 15     | NetMHCIIpan                  | DYSVLVNSASFSTFK  | 0.68            | 0.68          | 93.82% (471/502) | Non-Toxin |
| 255   | S protein | DRB1*15:01            | 15     | Consensus (smm/nn/sturniolo) | ECSNLLQYGSFCTQ   | 0.72            | 0.72          | 93.82% (471/502) | Non-Toxin |
| 256   | S protein | DRB5*01:01            | 15     | Consensus (smm/nn/sturniolo) | EFVFKNIDGYFKIYS  | 0.17            | 0.17          | 92.03% (462/502) | Non-Toxin |
| 257   | S protein | DRB3*02:02            | 15     | NetMHCIIpan                  | EGVFSVNGTHWFVTQ  | 0.21            | 0.21          | 93.23% (468/502) | Non-Toxin |
| 258   | S protein | DRB1*04:05            | 15     | Consensus (smm/nn/sturniolo) | ESIVRFPNITNLCPF  | 0.77            | 0.77          | 93.43% (469/502) | Non-Toxin |
| 259   | S protein | DRB1*15:01            | 15     | Consensus (smm/nn/sturniolo) | FQTLALHRSYLTGP   | 1.1             | 1.1           | 93.23% (468/502) | Non-Toxin |
| 260   | S protein | DRB5*01:01            | 15     | Consensus (smm/nn/sturniolo) | FVFKNIDGYFKIYSK  | 0.17            | 0.17          | 92.03% (462/502) | Non-Toxin |
| 261   | S protein | DRB3*01:01            | 15     | Consensus (comb.lib./smm/nn) | FVIRGDEVQRQIAPGQ | 0.54            | 0.54          | 93.63% (470/502) | Non-Toxin |
| 262   | S protein | DQA1*05:01/DQB1*03:01 | 15     | Consensus (comb.lib./smm/nn) | GFIAGLIAIVMVTIM  | 1.6             | 1.6           | 93.82% (471/502) | Non-Toxin |
| 263   | S protein | DRB5*01:01            | 15     | Consensus (smm/nn/sturniolo) | GINITRFQTLALHR   | 0.52            | 0.52          | 93.43% (469/502) | Non-Toxin |
| 264   | S protein | DRB1*11:01            | 15     | Consensus (smm/nn/sturniolo) | GNYNLYRFLFRKSNL  | 0.22            | 0.22          | 92.63% (465/502) | Non-Toxin |
| 265   | S protein | DQA1*01:02/DQB1*06:02 | 15     | Consensus (comb.lib./smm/nn) | IAGLIAIVMVTIMLC  | 1.6             | 1.6           | 93.82% (471/502) | Non-Toxin |
| 266   | S protein | DRB1*07:01            | 15     | Consensus (comb.lib./smm/nn) | IAPNFTISVTTEI    | 0.47            | 0.47          | 93.82% (471/502) | Non-Toxin |
| 267   | S protein | DRB5*01:01            | 15     | Consensus (smm/nn/sturniolo) | INITRFQTLALHRS   | 0.32            | 0.32          | 93.23% (468/502) | Non-Toxin |
| 268   | S protein | DRB1*07:01            | 15     | Consensus (comb.lib./smm/nn) | IPTNFTISVTTEILP  | 0.52            | 0.52          | 93.82% (471/502) | Non-Toxin |
| 269   | S protein | DRB5*01:01            | 15     | Consensus (smm/nn/sturniolo) | ITRFQTLALHRSYL   | 0.26            | 0.26          | 93.23% (468/502) | Non-Toxin |
| 270   | S protein | DPA1*02:01/DPB1*14:01 | 15     | NetMHCIIpan                  | ITRFQTLALHRSYL   | 0.43            | 0.43          | 93.23% (468/502) | Non-Toxin |
| 271   | S protein | DQA1*05:01/DQB1*03:01 | 15     | Consensus (comb.lib./smm/nn) | IWLGFIAGLIAIVMV  | 0.51            | 0.51          | 93.43% (469/502) | Non-Toxin |
| 272   | S protein | DRB3*02:02            | 15     | NetMHCIIpan                  | KTQSLLVNNATNVV   | 0.17            | 0.17          | 93.82% (471/502) | Non-Toxin |
| 273   |           | DRB1*13:02            | 15     | Consensus (smm/nn/sturniolo) | KTQSLLVNNATNVV   | 0.01            | 0.01          | 93.82% (471/502) | Non-Toxin |
| 274   | S protein | DQA1*05:01/DQB1*03:01 | 15     | Consensus (comb.lib./smm/nn) | LGFIAGLIAIVMTI   | 1.6             | 1.6           | 93.82% (471/502) | Non-Toxin |
| 275   | S protein | DRB1*13:02            | 15     | Consensus (smm/nn/sturniolo) | LIVNNATNVVIVK/CE | 0.03            | 0.03          | 93.23% (468/502) | Non-Toxin |
| 276   | S protein | DRB1*13:02            | 15     | Consensus (smm/nn/sturniolo) | LLIVNNATNVVIVKVC | 0.01            | 0.01          | 93.23% (468/502) | Non-Toxin |
| 277   | S protein | DRB3*02:02            | 15     | NetMHCIIpan                  | LLIVNNATNVVIVKVC | 0.09            | 0.09          | 93.23% (468/502) | Non-Toxin |
| 278   | S protein | DRB1*01:01            | 15     | Consensus (comb.lib./smm/nn) | LSFELLHAPATVCGP  | 0.03            | 0.03          | 92.23% (463/502) | Non-Toxin |
| 279   | S protein | DRB5*01:01            | 15     | Consensus (smm/nn/sturniolo) | NITRFQTLALHRSY   | 0.32            | 0.32          | 93.23% (468/502) | Non-Toxin |
| 280   | S protein | DPA1*02:01/DPB1*14:01 | 15     | NetMHCIIpan                  | NITRFQTLALHRSY   | 0.45            | 0.45          | 93.23% (468/502) | Non-Toxin |
| 281   | S protein | DRB1*15:01            | 15     | Consensus (smm/nn/sturniolo) | NLLQYGSFCTQLNR   | 0.75            | 0.75          | 93.82% (471/502) | Non-Toxin |
| 282   | S protein | DRB1*15:01            | 15     | Consensus (smm/nn/sturniolo) | PTESIVRFPNITNLC  | 0.64            | 0.64          | 93.43% (469/502) | Non-Toxin |
| 283   | S protein | DRB1*07:01            | 15     | Consensus (comb.lib./smm/nn) | PTNFTISVTTEILPV  | 0.51            | 0.51          | 93.82% (471/502) | Non-Toxin |
| 284   | S protein | DQA1*01:01/DQB1*05:01 | 15     | Consensus (comb.lib./smm/nn) | PWYIWLGFIAGLIAI  | 1.9             | 1.9           | 93.43% (469/502) | Non-Toxin |
| 285   | S protein | DPA1*02:01/DPB1*14:01 | 15     | NetMHCIIpan                  | QLIRAAEIRASANLA  | 0.31            | 0.31          | 93.23% (468/502) | Non-Toxin |
| 286   | S protein | DRB1*15:01            | 15     | Consensus (smm/nn/sturniolo) | QPTESIVRFPNITNL  | 0.69            | 0.69          | 93.43% (469/502) | Non-Toxin |
| 287   | S protein | DPA1*02:01/DPB1*14:01 | 15     | NetMHCIIpan                  | QLLIRAAEIRASANL  | 0.2             | 0.2           | 93.23% (468/502) | Non-Toxin |
| 288   | S protein | DRB1*13:02            | 15     | Consensus (smm/nn/sturniolo) | QSLLVNNATNVVIVK  | 0.01            | 0.01          | 93.63% (470/502) | Non-Toxin |

|     |           |                       |    |                              |                 |      |      |                  |           |  |
|-----|-----------|-----------------------|----|------------------------------|-----------------|------|------|------------------|-----------|--|
| 289 | S protein | DRB3*02:02            | 15 | NetMHCIIpan                  | QSLIVNNATNVVIK  | 0.02 | 0.02 | 93.63% (470/502) | Non-Toxin |  |
| 290 | S protein | DRB5*01:01            | 15 | Consensus (smm/nn/sturniolo) | REFVFNIDGYFKIY  | 0.17 | 0.17 | 91.83% (461/502) | Non-Toxin |  |
| 291 | S protein | DRB3*02:02            | 15 | NetMHCIIpan                  | REGVFNNGTHWVFT  | 0.2  | 0.2  | 93.43% (469/502) | Non-Toxin |  |
| 292 | S protein | DRB5*01:01            | 15 | Consensus (smm/nn/sturniolo) | RFQTLALHRSYLTP  | 0.58 | 0.58 | 93.23% (468/502) | Non-Toxin |  |
| 293 | S protein | DRB1*01:01            | 15 | Consensus (comb.lib./smm/nn) | SFELLHAPATVCGPK | 0.09 | 0.09 | 92.23% (463/502) | Non-Toxin |  |
| 294 | S protein | DRB3*01:01            | 15 | Consensus (comb.lib./smm/nn) | SFVIRGDEVRQIAPG | 0.51 | 0.51 | 93.63% (470/502) | Non-Toxin |  |
| 295 | S protein | DRB1*04:05            | 15 | Consensus (smm/nn/sturniolo) | SIVRFNPITNLCFPG | 0.98 | 0.98 | 93.43% (469/502) | Non-Toxin |  |
| 296 | S protein | DRB1*13:02            | 15 | Consensus (smm/nn/sturniolo) | SKTQSLIVNNATNV  | 0.03 | 0.03 | 93.82% (471/502) | Non-Toxin |  |
| 297 | S protein | DRB1*13:02            | 15 | Consensus (smm/nn/sturniolo) | SLIVNNATNVVIKV  | 0.01 | 0.01 | 93.63% (470/502) | Non-Toxin |  |
| 298 | S protein | DRB3*02:02            | 15 | NetMHCIIpan                  | SLIVNNATNVVIKV  | 0.03 | 0.03 | 93.63% (470/502) | Non-Toxin |  |
| 299 | S protein | DRB1*15:01            | 15 | Consensus (smm/nn/sturniolo) | SNLLQYGSFCTQLN  | 0.6  | 0.6  | 93.82% (471/502) | Non-Toxin |  |
| 300 | S protein | DQA1*05:01/DQB1*03:01 | 15 | Consensus (comb.lib./smm/nn) | SSGWTAGAAAYVGY  | 0.94 | 0.94 | 93.43% (469/502) | Non-Toxin |  |
| 301 | S protein | DQA1*05:01/DQB1*03:01 | 15 | Consensus (comb.lib./smm/nn) | SSSGWTAGAAAYVGY | 1.1  | 1.1  |                  | Non-Toxin |  |
| 302 | S protein | DRB1*15:01            | 15 | Consensus (smm/nn/sturniolo) | TESIVRFNPITNLC  | 0.69 | 0.69 | 93.43% (469/502) | Non-Toxin |  |
| 303 | S protein | DRB1*07:01            | 15 | Consensus (comb.lib./smm/nn) | TNFTISVTTEILPVS | 0.52 | 0.52 | 93.82% (471/502) | Non-Toxin |  |
| 304 | S protein | DRB1*13:02            | 15 | Consensus (smm/nn/sturniolo) | TQSLIVNNATNVVI  | 0.01 | 0.01 | 93.63% (470/502) | Non-Toxin |  |
| 305 | S protein | DRB3*02:02            | 15 | NetMHCIIpan                  | TQSLIVNNATNVVI  | 0.06 | 0.06 | 93.63% (470/502) | Non-Toxin |  |
| 306 | S protein | DRB5*01:01            | 15 | Consensus (smm/nn/sturniolo) | TRFQTLALHRSYLT  | 0.35 | 0.35 | 93.23% (468/502) | Non-Toxin |  |
| 307 | S protein | DRB1*01:01            | 15 | Consensus (comb.lib./smm/nn) | VLSFELLHAPATVCG | 0.03 | 0.03 | 92.23% (463/502) | Non-Toxin |  |
| 308 | S protein | DRB1*01:01            | 15 | Consensus (comb.lib./smm/nn) | VVLSFELLHAPATV  | 0.03 | 0.03 | 92.23% (463/502) | Non-Toxin |  |
| 309 | S protein | DRB1*01:01            | 15 | Consensus (comb.lib./smm/nn) | VVLSFELLHAPATV  | 0.09 | 0.09 | 92.23% (463/502) | Non-Toxin |  |
| 310 | S protein | DQA1*05:01/DQB1*03:01 | 15 | Consensus (comb.lib./smm/nn) | WLGFIAGLIAVMVT  | 1.6  | 1.6  | 93.63% (470/502) | Non-Toxin |  |
| 311 | S protein | DQA1*05:01/DQB1*03:01 | 15 | Consensus (comb.lib./smm/nn) | WYIWLGFJAGLIAIV | 0.58 | 0.58 | 93.43% (469/502) | Non-Toxin |  |
| 312 | S protein | DRB3*01:01            | 15 | Consensus (comb.lib./smm/nn) | YADSFVIRGDEVRQI | 0.49 | 0.49 | 93.63% (470/502) | Non-Toxin |  |
| 313 | S protein | DQA1*05:01/DQB1*03:01 | 15 | Consensus (comb.lib./smm/nn) | YIWLGFJAGLIAIVM | 0.51 | 0.51 | 93.43% (469/502) | Non-Toxin |  |
| 314 | S protein | DRB3*02:02            | 15 | NetMHCIIpan                  | YSVLYNSASFSTFKC | 0.66 | 0.66 | 93.82% (471/502) | Non-Toxin |  |

**Supplementary Table S4:** HLA alleles covered by the overlapping CTL and HTL epitopes.

| S.No. | HLA alleles    | Class of HLA alleles |
|-------|----------------|----------------------|
| 1     | HLA-A*01:01    | HLA Class I alleles  |
| 2     | HLA-A*02:01    |                      |
| 3     | HLA-A*02:03    |                      |
| 4     | HLA-A*02:06    |                      |
| 5     | HLA-A*03:01    |                      |
| 6     | HLA-A*11:01    |                      |
| 7     | HLA-A*23:01    |                      |
| 8     | HLA-A*24:02    |                      |
| 9     | HLA-A*26:01    |                      |
| 10    | HLA-A*30:01    |                      |
| 11    | HLA-A*30:02    |                      |
| 12    | HLA-A*31:01    |                      |
| 13    | HLA-A*32:01    |                      |
| 14    | HLA-A*33:01    |                      |
| 15    | HLA-A*68:01    |                      |
| 16    | HLA-A*68:02    |                      |
| 17    | HLA-B*07:02    |                      |
| 18    | HLA-B*08:01    |                      |
| 19    | HLA-B*15:01    |                      |
| 20    | HLA-B*35:01    |                      |
| 21    | HLA-B*40:01    |                      |
| 22    | HLA-B*44:02    |                      |
| 23    | HLA-B*44:03    |                      |
| 24    | HLA-B*51:01    |                      |
| 25    | HLA-B*53:01    |                      |
| 26    | HLA-B*57:01    |                      |
| 27    | HLA-B*58:01    |                      |
| 28    | HLA-DPA1*01    | HLA Class I alleles  |
| 29    | HLA-DPA1*01:03 |                      |
| 30    | HLA-DPA1*02:01 |                      |
| 31    | HLA-DPA1*03:01 |                      |
| 32    | HLA-DPB1*01:01 |                      |
| 33    | HLA-DPB1*02:01 |                      |
| 34    | HLA-DPB1*04:01 |                      |
| 35    | HLA-DPB1*04:02 |                      |

|    |                |  |
|----|----------------|--|
| 36 | HLA-DPB1*05:01 |  |
| 37 | HLA-DPB1*14:01 |  |
| 38 | HLA-DQA1*01:01 |  |
| 39 | HLA-DQA1*01:02 |  |
| 40 | HLA-DQA1*05:01 |  |
| 41 | HLA-DQB1*02:01 |  |
| 42 | HLA-DQB1*05:01 |  |
| 43 | HLA-DQB1*06:02 |  |
| 44 | HLA-DRB1*01:01 |  |
| 45 | HLA-DRB1*04:01 |  |
| 46 | HLA-DRB1*04:05 |  |
| 47 | HLA-DRB1*07:01 |  |
| 48 | HLA-DRB1*09:01 |  |
| 49 | HLA-DRB1*11:01 |  |
| 50 | HLA-DRB1*13:02 |  |
| 51 | HLA-DRB1*15:01 |  |
| 52 | HLA-DRB3*01:01 |  |
| 53 | HLA-DRB3*02:02 |  |
| 54 | HLA-DRB4*01:01 |  |
| 55 | HLA-DRB5*01:01 |  |

**Supplementary Table S5:** Population coverage by all the overlapping CTL and HTL epitopes forming epitope clusters.

| population/area | Class combined        |                          |                   |
|-----------------|-----------------------|--------------------------|-------------------|
|                 | coverage <sup>a</sup> | average_hit <sup>b</sup> | pc90 <sup>c</sup> |
| Algeria         | 79.67%                | 20.09                    | 1.97              |
| American Samoa  | 98.75%                | 65.28                    | 38.26             |
| Argentina       | 99.74%                | 95.44                    | 52.01             |
| Australia       | 98.16%                | 78.28                    | 31.37             |
| Austria         | 99.99%                | 113.11                   | 66.15             |
| Belarus         | 43.81%                | 3.23                     | 0.71              |
| Belgium         | 99.76%                | 87.08                    | 49.51             |
| Bolivia         | 38.38%                | 5.02                     | 0.97              |
| Borneo          | 38.38%                | 6.32                     | 0.97              |
| Brazil          | 99.99%                | 140.15                   | 88.36             |
| Bulgaria        | 99.68%                | 95.65                    | 53.93             |



|                          |         |        |        |
|--------------------------|---------|--------|--------|
| Burkina Faso             | 67.18%  | 32.67  | 3.96   |
| Cameroon                 | 99.98%  | 136.25 | 72.31  |
| Canada                   | 89.48%  | 20.21  | 3.8    |
| Cape Verde               | 99.76%  | 117.59 | 58.01  |
| Central Africa           | 99.96%  | 129.22 | 68.79  |
| Central African Republic | 66.32%  | 20.16  | 1.78   |
| Central America          | 80.55%  | 20.65  | 3.09   |
| Chile                    | 99.48%  | 89.01  | 43.08  |
| China                    | 99.83%  | 121.35 | 63.51  |
| Colombia                 | 78.87%  | 21.53  | 1.89   |
| Congo                    | 93.93%  | 22.36  | 9.86   |
| Cook Islands             | 100.00% | 76.33  | 46.33  |
| Costa Rica               | 76.74%  | 16.09  | 2.58   |
| Croatia                  | 99.99%  | 126.99 | 77.32  |
| Cuba                     | 99.77%  | 111.02 | 58.37  |
| Czech Republic           | 99.95%  | 117.22 | 65.85  |
| Denmark                  | 95.41%  | 25.93  | 10.65  |
| East Africa              | 99.98%  | 135.39 | 74.29  |
| East Asia                | 99.81%  | 115.86 | 57.72  |
| Ecuador                  | 99.71%  | 95.91  | 46.78  |
| England                  | 100.00% | 131.07 | 82.91  |
| Equatorial Guinea        | 72.14%  | 14.25  | 3.23   |
| Ethiopia                 | 96.17%  | 29.61  | 11.44  |
| Europe                   | 100.00% | 170.31 | 117.87 |
| Fiji                     | 96.74%  | 25.75  | 11.2   |
| Finland                  | 100.00% | 120.96 | 68.64  |
| France                   | 100.00% | 176.9  | 125.21 |
| Gabon                    | 99.95%  | 73.91  | 44.53  |
| Gambia                   | 99.90%  | 65.49  | 41.85  |
| Georgia                  | 99.85%  | 109.46 | 57.53  |
| Germany                  | 100.00% | 137.81 | 86.57  |
| Greece                   | 87.50%  | 22.14  | 3.2    |
| Guatemala                | 20.40%  | 4.99   | 0.75   |
| Guinea-Bissau            | 98.74%  | 96.3   | 36.3   |
| Hong Kong                | 96.05%  | 58.93  | 25.23  |
| India                    | 99.94%  | 123.02 | 71.53  |
| Indonesia                | 96.59%  | 63.06  | 23.28  |
| Iran                     | 99.72%  | 100.42 | 51.81  |
| Ireland Northern         | 99.99%  | 117.02 | 72.08  |
| Ireland South            | 99.99%  | 115.21 | 70.53  |
| Israel                   | 98.99%  | 82.96  | 34.51  |

|                       |         |        |        |
|-----------------------|---------|--------|--------|
| Italy                 | 99.82%  | 110.18 | 59.32  |
| Ivory Coast           | 67.75%  | 25.43  | 3.41   |
| Jamaica               | 82.25%  | 18.28  | 2.25   |
| Japan                 | 99.95%  | 140.06 | 78.99  |
| Jordan                | 98.07%  | 67.52  | 25.05  |
| Kenya                 | 99.96%  | 125.27 | 66.5   |
| Kiribati              | 56.35%  | 9.61   | 2.06   |
| Korea; South          | 99.74%  | 106.67 | 52.49  |
| Lebanon               | 61.98%  | 8.81   | 1.05   |
| Liberia               | 91.53%  | 35.2   | 26.27  |
| Macedonia             | 97.86%  | 37.84  | 12.81  |
| Malaysia              | 90.59%  | 50.93  | 6.9    |
| Mali                  | 96.02%  | 83.84  | 22.38  |
| Martinique            | 71.03%  | 25.57  | 1.38   |
| Mexico                | 100.00% | 149.99 | 98.41  |
| Mongolia              | 99.46%  | 88.15  | 46.32  |
| Morocco               | 99.86%  | 109.88 | 59.86  |
| Nauru                 | 82.88%  | 15.4   | 2.34   |
| Netherlands           | 87.50%  | 21.51  | 3.2    |
| New Caledonia         | 99.97%  | 88.65  | 59.66  |
| New Zealand           | 90.84%  | 43.25  | 5.16   |
| Nigeria               | 90.03%  | 39.47  | 26.01  |
| Niue                  | 91.02%  | 38.7   | 10.12  |
| North Africa          | 99.56%  | 100.23 | 45.59  |
| North America         | 100.00% | 166.28 | 113.61 |
| Northeast Asia        | 99.84%  | 121.14 | 63.63  |
| Norway                | 97.19%  | 31.38  | 12.9   |
| Oceania               | 99.86%  | 113.14 | 62.67  |
| Oman                  | 99.69%  | 89.6   | 48.6   |
| Pakistan              | 97.13%  | 56.16  | 26.19  |
| Papua New Guinea      | 100.00% | 122.52 | 89.36  |
| Paraguay              | 25.70%  | 4.63   | 2.42   |
| Peru                  | 100.00% | 106.29 | 54.99  |
| Philippines           | 96.26%  | 64.15  | 37.87  |
| Poland                | 99.99%  | 127.2  | 78.58  |
| Portugal              | 99.86%  | 112.89 | 61.91  |
| Romania               | 99.67%  | 93.68  | 50.23  |
| Russia                | 100.00% | 157.35 | 107.43 |
| Rwanda                | 64.44%  | 20.73  | 1.12   |
| Samoa                 | 97.31%  | 52.21  | 17.85  |
| Sao Tome and Principe | 98.33%  | 85.65  | 31.47  |

|                           |               |               |              |
|---------------------------|---------------|---------------|--------------|
| Saudi Arabia              | 99.51%        | 90.79         | 46.85        |
| Scotland                  | 98.48%        | 48.85         | 18.32        |
| Senegal                   | 96.67%        | 90.69         | 29.48        |
| Serbia                    | 73.37%        | 24.84         | 4.13         |
| Singapore                 | 96.73%        | 65.18         | 25.2         |
| Slovenia                  | 99.99%        | 80.78         | 59.26        |
| South Africa              | 93.56%        | 63.39         | 16.23        |
| South America             | 99.87%        | 119.99        | 66.69        |
| South Asia                | 99.97%        | 131.94        | 80.9         |
| Southeast Asia            | 99.26%        | 79.48         | 36.82        |
| Southwest Asia            | 98.54%        | 80.38         | 33.12        |
| Spain                     | 100.00%       | 130.17        | 77.24        |
| Sri Lanka                 | 52.39%        | 22.7          | 5.25         |
| Sudan                     | 96.25%        | 72.21         | 24.29        |
| Sweden                    | 100.00%       | 184.71        | 128.28       |
| Taiwan                    | 99.78%        | 90.33         | 47.35        |
| Thailand                  | 99.04%        | 71.41         | 30.17        |
| Tokelau                   | 94.65%        | 43.18         | 44.11        |
| Tonga                     | 87.20%        | 36.78         | 4.69         |
| Tunisia                   | 99.63%        | 101.6         | 52.14        |
| Turkey                    | 97.28%        | 52.55         | 17.49        |
| Uganda                    | 99.98%        | 136.66        | 76.57        |
| Ukraine                   | 50.64%        | 3.87          | 0.81         |
| United Kingdom            | 31.77%        | 8.9           | 4.1          |
| United States             | 100.00%       | 167.87        | 115.74       |
| Venezuela                 | 95.65%        | 71.89         | 16.7         |
| Vietnam                   | 95.32%        | 60.75         | 24.19        |
| West Africa               | 99.99%        | 154.32        | 89.11        |
| West Indies               | 99.90%        | 118.21        | 64.3         |
| Zambia                    | 98.10%        | 89.47         | 33.81        |
| Zimbabwe                  | 99.78%        | 97.75         | 38.46        |
|                           |               |               |              |
| <b>World</b>              | <b>99.98%</b> | <b>150.46</b> | <b>92.94</b> |
| <b>Average</b>            | <b>91.11</b>  | <b>79.27</b>  | <b>41.42</b> |
| <b>Standard deviation</b> | <b>16.97</b>  | <b>46.69</b>  | <b>32.37</b> |

Note: Following allele(s) were not available at IEDB "Population coverage" tool database, and therefore not included in the calculation, please note that allele names are case sensitive: DPA1\*01, DRB5\*01:01, DRB3\*02:02, DRB3\*01:01, DRB4\*01:01.

**a:** projected population coverage;

**b:** average number of epitope hits / HLA combinations recognized by the population;  
**c:** minimum number of epitope hits / HLA combinations recognized by 90% of the population

**Supplementary Table S6:** Construct of CTL-MPV-1, CTL-MPV-2, CTL-MPV-3, HTL-MPV-1, and HTL-MPV-2. Physicochemical property analysis based on the amino acid sequences of all the designed three CTL and two HTL Multi-Patch Vaccines.

| S.No. | Vaccine                                                                                                                                                            | Vaccine constructs                                                                                                                                                                                                                                                                                                                                                                                                                                                                                                                                                                                                                                                                                                                                                                                                                                                                                                                                         |
|-------|--------------------------------------------------------------------------------------------------------------------------------------------------------------------|------------------------------------------------------------------------------------------------------------------------------------------------------------------------------------------------------------------------------------------------------------------------------------------------------------------------------------------------------------------------------------------------------------------------------------------------------------------------------------------------------------------------------------------------------------------------------------------------------------------------------------------------------------------------------------------------------------------------------------------------------------------------------------------------------------------------------------------------------------------------------------------------------------------------------------------------------------|
| 1     | <p><b><u>CTL-MPV-1</u></b><br/> <b>construct</b></p> <p>(Comprising of identified CTL Ag-PATCHES from Membrane and Spike protein of SARS-CoV-2):</p>               | <p>GIGDPVTCLKSGAICHVPVFCPRRYKQIGTCGLPGTKCCKKPEAAAKGTITVEELKKLLEQWNLV<br/> IGFLFLTWICLLQFAYANRNRFYIHKLIFLWLLWPVTLACFVLAAVGGGGRINWITGGIAIAM<br/> ACLVGLMWLSYFIASFRLFARTRSMWSFNGGGGSKEITVATSRTLSSYYKLGASQRVAGDSGFA<br/> AYSRYRIGNYKLGGGGSTTRTQLPPAYTNSFTRGVYYPDKVFRSSVGGGGSSTQDLFLPFFSNV<br/> TWFGGGGSVLPFNDGVYFASTSEKSNIRGWIFGGGGSVYVYHKNNKSWMESEFRVYSSANNC<br/> TFEYVSQPFLGGGGSKQGNFKNLREFVFKNIDGYFKIYSKHTPIGGGGSEPLVDLPIGINITRFQ<br/> TLLAGGGGSTPGDSSSGWTAGAAAAYVGYLQPRTFLLKGGGGSSETKCTLKSFTVEKGIYQTS<br/> NFRGGGGSFPNITNLCPFGEVFNATRFASVGGGGSRISNCVADYSVLYNSASFSTFKCYGGGGS<br/> NVYADSFVIRGDEVRRGGGGSKVGNNYNYLRLFRKSNLKPFERGGGGSNTSNQVAVLYQDV<br/> NCTEVGGGGSRVYSTGSNVFGGGGSPPRRARSVASQSIAYGGGGSFTISVTTEILPVSMTKTSV<br/> DCTMYGGGGSNTQEVFAQVKQIYKTPPIKGGGGSKRSPFIEDLLFNKVTLAGGGGSPLLTDEMI<br/> AQYGGGGSQIPFAMQMAFRFNGI GGGSFPQSAPHGVVFGGGGSFVSNGTHWVFTQRGGGG<br/> SYEQYIKWPWYIWLGFIAGLIAIVEAAKGIINTLQKYYCRVRGGRCVLSCLPKEEQIGKCSTR<br/> GRKCCRKKHHHHHH</p> |
| 2     | <p><b><u>CTL-MPV-2</u></b><br/> <b>construct</b></p> <p>(Comprising of identified CTL Ag-PATCHES from Nucleocapsid protein and ORF1ab proteins of SARS-CoV-2):</p> | <p>GIGDPVTCLKSGAICHVPVFCPRRYKQIGTCGLPGTKCCKKPEAAAKNQRNAPRITFGGPSGGGG<br/> SRSKQRRPQGLPNNTASWFTALTQHKGGGGSNSSPDDQIGYYRRATRRIRGGDGKMKDLSR<br/> RWYFYLLGGGSLPYGANKDGIWGGGGSKSAEASKKPRQKRTATKAYNVTQAFGGGGSQE<br/> LIRQGTDYGGGGSIAQFAPSASAFFGMSRIGMEVTPSGTWLTYGGGGSLLNKHIDAYKTFPPT<br/> EPKKGGGGSDEWSMATYYLFGGGGETISLAGSYKGGGGSSTQVVDMSMTYGGGGSVAVMYMG<br/> TLSYEQFGGGGSVAEWFLAYILFTRFFYVGGGGSRMVYFFASFYVWKSYYGGGGSAYVNTFSS<br/> TFNVPMKGGGGSCLAYFMRFRRAFGGGGSVMVFTPLVPFWITAIYGGGGSFYWFFSNYK<br/> RRVVF GGGSPLSLATVAYFNMVYGGGGSILMTARTVYGGGGSACTDDNALAYYGGGGSY<br/> TMADLVYALGGGSKLFDYFYKWDQTYGGGGSARLYYDSMSYGGGGSVDTFVNEFYAYL<br/> RKHFSMGGGGSFPLCANGQVFLYGGGGSIPMYKGLPWNVVRGGGGSYVMHANYIFWEAA<br/> AKGIINTLQKYYCRVRGGRCVLSCLPKEEQIGKCSTRGRKCCRKKHHHHHH</p>                                                                                                                                                                                                    |



|                 |                                                                                                                                                                                                                                                      |                                                                                                                                                                                                                                                                                                                                                                                                                                                                                                                                                                                                                                                                                                                                                                                                                                                                                                                                                                                                                                    |
|-----------------|------------------------------------------------------------------------------------------------------------------------------------------------------------------------------------------------------------------------------------------------------|------------------------------------------------------------------------------------------------------------------------------------------------------------------------------------------------------------------------------------------------------------------------------------------------------------------------------------------------------------------------------------------------------------------------------------------------------------------------------------------------------------------------------------------------------------------------------------------------------------------------------------------------------------------------------------------------------------------------------------------------------------------------------------------------------------------------------------------------------------------------------------------------------------------------------------------------------------------------------------------------------------------------------------|
| <p><b>3</b></p> | <p><b><u>CTL-MPV-3</u></b><br/> <b>construct</b><br/>                 (Comprising of identified CTL Ag-PATCHES from Envelope protein, ORF3a protein, ORF6 protein, ORF7a protein, ORF7b protein, ORF8 protein, and ORF10 protein of SARS-CoV-2):</p> | <p>GIGDPVTCLKSGAICHVPFCPRRYKQIGTCGLPGTKCCKKPEAAAKSEETGTLIVNSVLLFLAFV<br/>                 VLLVLTALILTALRLCAYGGGGSVSLVKPSFYVYSRVKLNSSRGGGGSFMRIFTIGTVTLKGGG<br/>                 GSTIPIQASLPFGWLIVGVALLAVFQSASKIITLKKRWGGGGSHFVCNLLLLFVTVGGGGSLLVA<br/>                 AGLEAPFLYLALVYFLQSFVRIIMRLWLCWKCRGGGGSYFLCWHTNCYDYGGGGSSTSPI<br/>                 SEHDYQIGGYGGGGSYYQLYSTQLSTDTGVEHVTFFIYNKIGGGGSFHLVDFQVTIAEILLIMR<br/>                 TFKVSIWNLDYHGGGGSMKIILFLALITLATCELYHYGGGGSLLKEPCSSGTYEGNSPFHPLAD<br/>                 NKFALTCFSTQFAFACPDGVKHVYQLRARSVSPKLFIRGGGGSSEVQELYSPIFLIVAAIVFITLCP<br/>                 TLKRKGGGGSMIELSLIDFYLCFLAFLFLVLIIMLIIFWFSLELGGGGSMMKFLVFLGIITVAAFV<br/>                 GGGSYVDDPCPIHFYSKWYIRVGARKSAPLIELCGGGGSIQYIDIGNYTVSCLPFTINCQEPKL<br/>                 GSLVVRCSFYEDFLEYHDVVRVVLGGGSGMYINVFVAFPTIYSLLLCRMAAAKGIINTLQKYYCR<br/>                 VRGGRCVLSCLPKEEQIGKICSTRGRKCCRRKKHHHHHH</p>                                                                                     |
| <p><b>4</b></p> | <p><b><u>HTL-MPV-1</u></b><br/> <b>construct</b><br/>                 (Comprising of identified CTL Ag-PATCHES from Envelope protein, Membrane protein, Spike protein, Nucleocapsid protein, ORF3a protein of SARS-CoV-2):</p>                       | <p>GIGDPVTCLKSGAICHVPFCPRRYKQIGTCGLPGTKCCKKPEAAAKVNSVLLFLAFVLLVLT<br/>                 AILTGGGGSIKLIFLWLLWPVTLACGGGGSVGLMWLSYFIASFRLFARGGGGSRTLSYYKLGA<br/>                 SQRVAGDSGGGGSSTQSLNINATNVVIKVCCEGGGGSREFVFNIDGYFKIYSKGGGSGINI<br/>                 TRFQTLALHRSYLTGPDSSSGWTAGAAAYVVGYYGGGGSQPTESIVRFPNITNLCFPGGGGGS<br/>                 DYSVLYNSASFSTFKCGGGGSYADSFVIRGDEVQRQIAPGQGGGGSVVLSFELLHAPATVCGPK<br/>                 GGGGSIAIPTNFTISVTTEILPVSGGGGSQQLIRAAEIRASANLAGGGGSREGVFSNGTHWFVT<br/>                 QGGGSPWYIWLGFIAGLIAIVMVTIMLCCGGGGSDDQIGYRRATRIRGGDGGGGSSTRN<br/>                 PANNAIIVLQLPQGTTLGGGGSWPQIAQFAPSASAFFGMSRGGGGSSTPSGTWLTYTGAIKLDD<br/>                 KDGGGGSDFVRATATIPIQASLPGGGGSAPFLYLALVYFLQSFVGGGGSSTGVEHVTFFIY<br/>                 NKIVDEPEEHVEAAAKGIINTLQKYYCRVRGGRCVLSCLPKEEQIGKICSTRGRKCCRRKKHH<br/>                 HHHH</p>                                                                                                                                            |
| <p><b>5</b></p> | <p><b><u>HTL-MPV-2</u></b><br/> <b>construct</b><br/>                 (Comprising of identified CTL Ag-PATCHES from ORF1ab protein, ORF6 protein, ORF7a protein, ORF7b protein, ORF8 protein, ORF10 protein) of SARS-CoV-2):</p>                     | <p>GIGDPVTCLKSGAICHVPFCPRRYKQIGTCGLPGTKCCKKPEAAAKAIIILASFSASTSAFVETGG<br/>                 GGSYAFASEAARVRSIFSGGGGSTLEETKFLTENLLYIDINGGGGSVQESPFVMSAPPAQ<br/>                 YELGGGGSLLQLCTFTRSTNSRIKASMGGGGSKLINIIWFLLSVCLGGGGSSEWFLAYILFTRF<br/>                 FYVLGLAAIMQLFFSYFAVHFISNSWLMWLIINLVQMAGGGGSVRMYIFFASFYVWKSIVGG<br/>                 GGSWLKQLIKVTLVFLVAAIFYLITPVHGGGGSFSAVGNICYTPSKLIEYTGGGGSDISASIVAG<br/>                 GIVAIIVTCLGGGGSFTPLVPFWITIAIICISTGGGGSVQSTQWSLFFFLYENAFPLGGGGSQAI<br/>                 ASEFSSLPYAAFATGGGGSSTQMNLKYAISAKNRARTGGGGSRAMPNMLRIMASLVLARKHG<br/>                 GGGSFVNEFYAYLRKHFSMMILGGGGSPEVKILNNLGVDIAANGGGGSQMEIDFLELAMDEF<br/>                 IERYGGGGSFAWWTAFVTNVNASSGGGGSNANYIFWRNTNPIQLSSYGGGGSSEILLIMRFTK<br/>                 VSIWNLDYIINLIKGGGGSMKIILFLALITLATCELYGGGGSLSLIDFYLCFLAFLFLVLIIMLIIF<br/>                 WFSLELGGGGSCTQHQPVVDDPCPIHFYSGGGGSYINVFVAFPTIYSLLLCRMMAAAKGIINTL<br/>                 QKYYCRVRGGRCVLSCLPKEEQIGKICSTRGRKCCRRKKHHHHHH</p> |

**Supplementary Table S7:** INF- $\gamma$  inducing POSITIVE epitopes with a score of 1 or more than 1, screened from the CTL MPVs.

| S.No. | CTL MPV   | Start-END | Sequence         | Method | Result   | Score |
|-------|-----------|-----------|------------------|--------|----------|-------|
| 1     | CTL-MPV-1 | 21-36     | RRYKQIGTCGLPGTK  | MERCI  | POSITIVE | 1     |
| 2     | CTL-MPV-1 | 22-37     | RYKQIGTCGLPGTKC  | MERCI  | POSITIVE | 1     |
| 3     | CTL-MPV-1 | 23-38     | YKQIGTCGLPGTKCC  | MERCI  | POSITIVE | 1     |
| 4     | CTL-MPV-1 | 24-39     | KQIGTCGLPGTKCCK  | MERCI  | POSITIVE | 1     |
| 5     | CTL-MPV-1 | 25-40     | QIGTCGLPGTKCCKK  | MERCI  | POSITIVE | 1     |
| 6     | CTL-MPV-1 | 41-56     | EAAAKGTITVEELKK  | MERCI  | POSITIVE | 1     |
| 7     | CTL-MPV-1 | 42-57     | AAAKGTITVEELKKL  | MERCI  | POSITIVE | 1     |
| 8     | CTL-MPV-1 | 43-58     | AAKGTITVEELKKLL  | MERCI  | POSITIVE | 1     |
| 9     | CTL-MPV-1 | 44-59     | AKGTITVEELKKLLE  | MERCI  | POSITIVE | 1     |
| 10    | CTL-MPV-1 | 150-165   | TRSMWSFNNGGGGSKE | MERCI  | POSITIVE | 1     |
| 11    | CTL-MPV-1 | 151-166   | RSMWSFNNGGGGSKEI | MERCI  | POSITIVE | 1     |
| 12    | CTL-MPV-1 | 152-167   | SMWSFNNGGGGSKEIT | MERCI  | POSITIVE | 1     |
| 13    | CTL-MPV-1 | 153-168   | MWSFNNGGGGSKEITV | MERCI  | POSITIVE | 1     |
| 14    | CTL-MPV-1 | 154-169   | WSFNNGGGGSKEITVA | MERCI  | POSITIVE | 1     |
| 15    | CTL-MPV-1 | 155-170   | SFNNGGGGSKEITVAT | MERCI  | POSITIVE | 1     |
| 16    | CTL-MPV-1 | 156-171   | FNNGGGGSKEITVATS | MERCI  | POSITIVE | 1     |
| 17    | CTL-MPV-1 | 157-172   | NGGGGSKEITVATSRT | MERCI  | POSITIVE | 1     |
| 18    | CTL-MPV-1 | 158-173   | GGGGGSKEITVATSRT | MERCI  | POSITIVE | 1     |
| 19    | CTL-MPV-1 | 159-174   | GGGSKEITVATSRTL  | MERCI  | POSITIVE | 1     |
| 20    | CTL-MPV-1 | 163-178   | KEITVATSRTLSYYK  | MERCI  | POSITIVE | 1     |
| 21    | CTL-MPV-1 | 164-179   | EITVATSRTLSYYKL  | MERCI  | POSITIVE | 1     |
| 22    | CTL-MPV-1 | 165-180   | ITVATSRTLSYYKLG  | MERCI  | POSITIVE | 1     |
| 23    | CTL-MPV-1 | 166-181   | TVATSRTLSYYKLGGA | MERCI  | POSITIVE | 1     |
| 24    | CTL-MPV-1 | 167-182   | VATSRTLSYYKLGAS  | MERCI  | POSITIVE | 1     |
| 25    | CTL-MPV-1 | 168-183   | ATSRTLSYYKLGASQ  | MERCI  | POSITIVE | 1     |
| 26    | CTL-MPV-1 | 169-184   | TSRTLSYYKLGASQR  | MERCI  | POSITIVE | 1     |
| 27    | CTL-MPV-1 | 170-185   | SRTLSYYKLGASQRV  | MERCI  | POSITIVE | 1     |
| 28    | CTL-MPV-1 | 219-234   | TNSFTRGVYYPDKVF  | MERCI  | POSITIVE | 1     |
| 29    | CTL-MPV-1 | 220-235   | NSFTRGVYYPDKVFR  | MERCI  | POSITIVE | 1     |
| 30    | CTL-MPV-1 | 221-236   | SFTRGVYYPDKVFRS  | MERCI  | POSITIVE | 1     |
| 31    | CTL-MPV-1 | 222-237   | FTRGVYYPDKVFRSS  | MERCI  | POSITIVE | 1     |
| 32    | CTL-MPV-1 | 262-277   | GSVLPFNDGVYFAST  | MERCI  | POSITIVE | 1     |
| 33    | CTL-MPV-1 | 263-278   | SVLPFNDGVYFASTE  | MERCI  | POSITIVE | 1     |
| 34    | CTL-MPV-1 | 264-279   | VLPFNDGVYFASTEK  | MERCI  | POSITIVE | 1     |
| 35    | CTL-MPV-1 | 265-280   | LPFNDGVYFASTEKS  | MERCI  | POSITIVE | 1     |
| 36    | CTL-MPV-1 | 266-281   | PFNDGVYFASTEKSN  | MERCI  | POSITIVE | 1     |
| 37    | CTL-MPV-1 | 267-282   | FNDGVYFASTEKSNI  | MERCI  | POSITIVE | 1     |
| 38    | CTL-MPV-1 | 268-283   | NDGVYFASTEKSNI   | MERCI  | POSITIVE | 1     |

|    |           |         |                  |       |          |   |
|----|-----------|---------|------------------|-------|----------|---|
| 39 | CTL-MPV-1 | 269-284 | DGVYFASTEKSNIIR  | MERCI | POSITIVE | 1 |
| 40 | CTL-MPV-1 | 270-285 | GVYFASTEKSNIIRG  | MERCI | POSITIVE | 1 |
| 41 | CTL-MPV-1 | 271-286 | VYFASTEKSNIIRGW  | MERCI | POSITIVE | 1 |
| 42 | CTL-MPV-1 | 285-300 | WIFGGGGSGVYYHKN  | MERCI | POSITIVE | 3 |
| 43 | CTL-MPV-1 | 286-301 | IFGGGGSGVYYHKNN  | MERCI | POSITIVE | 3 |
| 44 | CTL-MPV-1 | 287-302 | FGGGGGSGVYYHKNNK | MERCI | POSITIVE | 3 |
| 45 | CTL-MPV-1 | 288-303 | GGGGSGVYYHKNNKS  | MERCI | POSITIVE | 4 |
| 46 | CTL-MPV-1 | 289-304 | GGGSGVYYHKNNKSW  | MERCI | POSITIVE | 4 |
| 47 | CTL-MPV-1 | 290-305 | GGSGVYYHKNNKSWM  | MERCI | POSITIVE | 4 |
| 48 | CTL-MPV-1 | 291-306 | GSGVYYHKNNKSWME  | MERCI | POSITIVE | 4 |
| 49 | CTL-MPV-1 | 292-307 | SGVYYHKNNKSWMES  | MERCI | POSITIVE | 4 |
| 50 | CTL-MPV-1 | 293-308 | GVYYHKNNKSWMESE  | MERCI | POSITIVE | 4 |
| 51 | CTL-MPV-1 | 294-309 | VYYHKNNKSWMESEF  | MERCI | POSITIVE | 2 |
| 52 | CTL-MPV-1 | 343-358 | FVFKNIDGYFKIYSK  | MERCI | POSITIVE | 1 |
| 53 | CTL-MPV-1 | 344-359 | VFKNIDGYFKIYSKH  | MERCI | POSITIVE | 1 |
| 54 | CTL-MPV-1 | 345-360 | FKNIDGYFKIYSKHT  | MERCI | POSITIVE | 1 |
| 55 | CTL-MPV-1 | 346-361 | KNIDGYFKIYSKHTP  | MERCI | POSITIVE | 1 |
| 56 | CTL-MPV-1 | 347-362 | NIDGYFKIYSKHTPI  | MERCI | POSITIVE | 1 |
| 57 | CTL-MPV-1 | 348-363 | IDGYFKIYSKHTPIG  | MERCI | POSITIVE | 1 |
| 58 | CTL-MPV-1 | 349-364 | DGYFKIYSKHTPIGG  | MERCI | POSITIVE | 1 |
| 59 | CTL-MPV-1 | 350-365 | GYFKIYSKHTPIGGG  | MERCI | POSITIVE | 1 |
| 60 | CTL-MPV-1 | 351-366 | YFKIYSKHTPIGGGG  | MERCI | POSITIVE | 1 |
| 61 | CTL-MPV-1 | 409-424 | YVGYLQPRTFLLKGG  | MERCI | POSITIVE | 1 |
| 62 | CTL-MPV-1 | 410-425 | VGYLQPRTFLLKGGG  | MERCI | POSITIVE | 1 |
| 63 | CTL-MPV-1 | 411-426 | GYLQPRTFLLKGGGG  | MERCI | POSITIVE | 1 |
| 64 | CTL-MPV-1 | 412-427 | YLQPRTFLLKGGGGS  | MERCI | POSITIVE | 1 |
| 65 | CTL-MPV-1 | 413-428 | LQPRTFLLKGGGGSS  | MERCI | POSITIVE | 1 |
| 66 | CTL-MPV-1 | 414-429 | QPRTFLLKGGGGSSSE | MERCI | POSITIVE | 2 |
| 67 | CTL-MPV-1 | 415-430 | PRTFLLKGGGGSSSET | MERCI | POSITIVE | 2 |
| 68 | CTL-MPV-1 | 416-431 | RTFLLKGGGGSSSETK | MERCI | POSITIVE | 2 |
| 69 | CTL-MPV-1 | 417-432 | TFLLKGGGGSSSETKC | MERCI | POSITIVE | 2 |
| 70 | CTL-MPV-1 | 418-433 | FLLKGGGGSSSETKCT | MERCI | POSITIVE | 2 |
| 71 | CTL-MPV-1 | 419-434 | LLKGGGGSSSETKCTL | MERCI | POSITIVE | 1 |
| 72 | CTL-MPV-1 | 420-435 | LKGGGGSSSETKCTLK | MERCI | POSITIVE | 1 |
| 73 | CTL-MPV-1 | 421-436 | KGGGGSSSETKCTLKS | MERCI | POSITIVE | 1 |
| 74 | CTL-MPV-1 | 422-437 | GGGGSSSETKCTLKSF | MERCI | POSITIVE | 1 |
| 75 | CTL-MPV-1 | 423-438 | GGGSSETKCTLKSFT  | MERCI | POSITIVE | 1 |
| 76 | CTL-MPV-1 | 508-523 | GSNVYADSFVIRGD   | MERCI | POSITIVE | 2 |
| 77 | CTL-MPV-1 | 509-524 | GSNVYADSFVIRGDE  | MERCI | POSITIVE | 2 |
| 78 | CTL-MPV-1 | 510-525 | SNVYADSFVIRGDEV  | MERCI | POSITIVE | 2 |
| 79 | CTL-MPV-1 | 511-526 | NVYADSFVIRGDEV   | MERCI | POSITIVE | 2 |

|              |                |                  |                  |               |               |              |
|--------------|----------------|------------------|------------------|---------------|---------------|--------------|
| 80           | CTL-MPV-1      | 512-527          | VYADSFVIRGDEVIRG | MERCI         | POSITIVE      | 2            |
| 81           | CTL-MPV-1      | 513-528          | YADSFVIRGDEVIRGG | MERCI         | POSITIVE      | 2            |
| 82           | CTL-MPV-1      | 514-529          | ADSFVIRGDEVIRGGG | MERCI         | POSITIVE      | 2            |
| 83           | CTL-MPV-1      | 515-530          | DSFVIRGDEVIRGGGG | MERCI         | POSITIVE      | 2            |
| 84           | CTL-MPV-1      | 516-531          | SFVIRGDEVIRGGGGS | MERCI         | POSITIVE      | 2            |
| 85           | CTL-MPV-1      | 591-606          | VFGGGGSSPRRARSV  | MERCI         | POSITIVE      | 1            |
| 86           | CTL-MPV-1      | 592-607          | FGGGGSSPRRARSVA  | MERCI         | POSITIVE      | 1            |
| 87           | CTL-MPV-1      | 593-608          | GGGGSSPRRARSVAS  | MERCI         | POSITIVE      | 1            |
| 88           | CTL-MPV-1      | 594-609          | GGGSSPRRARSVASQ  | MERCI         | POSITIVE      | 1            |
| 89           | CTL-MPV-1      | 751-766          | THWFVTQRGGGGSYE  | MERCI         | POSITIVE      | 1            |
| 90           | CTL-MPV-1      | 752-767          | HWFVTQRGGGGSYEQ  | MERCI         | POSITIVE      | 1            |
| 91           | CTL-MPV-1      | 753-768          | WFVTQRGGGGSYEQY  | MERCI         | POSITIVE      | 1            |
| 92           | CTL-MPV-1      | 754-769          | FVTQRGGGGSYEQYI  | MERCI         | POSITIVE      | 1            |
| 93           | CTL-MPV-1      | 755-770          | VTQRGGGGSYEQYIK  | MERCI         | POSITIVE      | 1            |
| 94           | CTL-MPV-1      | 756-771          | TQRGGGGSYEQYIKW  | MERCI         | POSITIVE      | 1            |
| 95           | CTL-MPV-1      | 757-772          | QRGGGGSYEQYIKWP  | MERCI         | POSITIVE      | 1            |
| 96           | CTL-MPV-1      | 758-773          | RGGGGSYEQYIKWPW  | MERCI         | POSITIVE      | 1            |
| 97           | CTL-MPV-1      | 759-774          | GGGGSYEQYIKWPWY  | MERCI         | POSITIVE      | 1            |
| 98           | CTL-MPV-1      | 760-775          | GGGSYEQYIKWPWYI  | MERCI         | POSITIVE      | 1            |
| 99           | CTL-MPV-1      | 825-840          | STRGRKCCRRKKHHH  | MERCI         | POSITIVE      | 1            |
| 100          | CTL-MPV-1      | 826-841          | TRGRKCCRRKKHHHH  | MERCI         | POSITIVE      | 1            |
| 101          | CTL-MPV-1      | 827-842          | RGRKCCRRKKHHHHH  | MERCI         | POSITIVE      | 1            |
| 102          | CTL-MPV-1      | 828-843          | GRKCCRRKKHHHHHH  | MERCI         | POSITIVE      | 2            |
| 103          | CTL-MPV-1      | 829-844          | RKCCRRKKHHHHHHH  | MERCI         | POSITIVE      | 2            |
| 104          | CTL-MPV-1      | 830-845          | KCCRRKKHHHHHHH   | MERCI         | POSITIVE      | 1            |
| 105          | CTL-MPV-1      | 831-846          | CCRRKKHHHHHHH    | MERCI         | POSITIVE      | 1            |
| 106          | CTL-MPV-1      | 832-847          | CRRKKHHHHHHH     | MERCI         | POSITIVE      | 1            |
| 107          | CTL-MPV-1      | 833-848          | RRKKHHHHHHH      | MERCI         | POSITIVE      | 1            |
| 108          | CTL-MPV-1      | 834-849          | RKKHHHHHHH       | MERCI         | POSITIVE      | 1            |
| <b>S.No.</b> | <b>CTL MPV</b> | <b>Start-END</b> | <b>Sequence</b>  | <b>Method</b> | <b>Result</b> | <b>Score</b> |
| 109          | CTL-MPV-2      | 21-36            | RRYKQIGTCGLPGTK  | MERCI         | POSITIVE      | 1            |
| 110          | CTL-MPV-2      | 22-37            | RYKQIGTCGLPGTKC  | MERCI         | POSITIVE      | 1            |
| 111          | CTL-MPV-2      | 23-38            | YKQIGTCGLPGTKCC  | MERCI         | POSITIVE      | 1            |
| 112          | CTL-MPV-2      | 24-39            | KQIGTCGLPGTKCCK  | MERCI         | POSITIVE      | 1            |
| 113          | CTL-MPV-2      | 25-40            | QIGTCGLPGTKCCKK  | MERCI         | POSITIVE      | 1            |
| 114          | CTL-MPV-2      | 37-52            | CKKPEAAAKNQRNAP  | MERCI         | POSITIVE      | 1            |
| 115          | CTL-MPV-2      | 66-81            | SKQRRPQGLPNNTAS  | MERCI         | POSITIVE      | 2            |
| 116          | CTL-MPV-2      | 67-82            | KQRRPQGLPNNTASW  | MERCI         | POSITIVE      | 2            |
| 117          | CTL-MPV-2      | 68-83            | QRRPQGLPNNTASWF  | MERCI         | POSITIVE      | 2            |
| 118          | CTL-MPV-2      | 69-84            | RRPQGLPNNTASWFT  | MERCI         | POSITIVE      | 2            |
| 119          | CTL-MPV-2      | 70-85            | RPQGLPNNTASWFTA  | MERCI         | POSITIVE      | 2            |



|     |           |         |                  |       |          |    |
|-----|-----------|---------|------------------|-------|----------|----|
| 120 | CTL-MPV-2 | 71-86   | PQGLPNNTASWFTAL  | MERCI | POSITIVE | 3  |
| 121 | CTL-MPV-2 | 72-87   | QGLPNNTASWFTALT  | MERCI | POSITIVE | 1  |
| 122 | CTL-MPV-2 | 73-88   | GLPNNTASWFTALTQ  | MERCI | POSITIVE | 1  |
| 123 | CTL-MPV-2 | 74-89   | LPNNTASWFTALTQH  | MERCI | POSITIVE | 1  |
| 124 | CTL-MPV-2 | 75-90   | PNNTASWFTALTQHG  | MERCI | POSITIVE | 1  |
| 125 | CTL-MPV-2 | 76-91   | NNTASWFTALTQHGK  | MERCI | POSITIVE | 1  |
| 126 | CTL-MPV-2 | 77-92   | NTASWFTALTQHGKG  | MERCI | POSITIVE | 1  |
| 127 | CTL-MPV-2 | 78-93   | TASWFTALTQHGKGG  | MERCI | POSITIVE | 1  |
| 128 | CTL-MPV-2 | 173-188 | AYNVTQAFGGGGSQE  | MERCI | POSITIVE | 1  |
| 129 | CTL-MPV-2 | 174-189 | YNVTQAFGGGGSQEL  | MERCI | POSITIVE | 1  |
| 130 | CTL-MPV-2 | 175-190 | NVTQAFGGGGSQELI  | MERCI | POSITIVE | 1  |
| 131 | CTL-MPV-2 | 176-191 | VTQAFGGGGSQELIR  | MERCI | POSITIVE | 1  |
| 132 | CTL-MPV-2 | 177-192 | TQAFGGGGSQELIRQ  | MERCI | POSITIVE | 1  |
| 133 | CTL-MPV-2 | 178-193 | QAFGGGGSQELIRQG  | MERCI | POSITIVE | 1  |
| 134 | CTL-MPV-2 | 179-194 | AFGGGGSQELIRQGT  | MERCI | POSITIVE | 1  |
| 135 | CTL-MPV-2 | 180-195 | FGGGGSQELIRQGT   | MERCI | POSITIVE | 1  |
| 136 | CTL-MPV-2 | 181-196 | GGGGGSQELIRQGTDY | MERCI | POSITIVE | 1  |
| 137 | CTL-MPV-2 | 182-197 | GGGSQELIRQGTDYG  | MERCI | POSITIVE | 1  |
| 138 | CTL-MPV-2 | 252-267 | PKKGGGGSDEWSMAT  | MERCI | POSITIVE | 19 |
| 139 | CTL-MPV-2 | 253-268 | KKGGGGSDEWSMATY  | MERCI | POSITIVE | 19 |
| 140 | CTL-MPV-2 | 254-269 | KGGGGSDEWSMATYY  | MERCI | POSITIVE | 19 |
| 141 | CTL-MPV-2 | 255-270 | GGGGGSDEWSMATYYL | MERCI | POSITIVE | 19 |
| 142 | CTL-MPV-2 | 256-271 | GGGSDEWSMATYYLF  | MERCI | POSITIVE | 19 |
| 143 | CTL-MPV-2 | 257-272 | GSDEWSMATYYLFG   | MERCI | POSITIVE | 14 |
| 144 | CTL-MPV-2 | 314-329 | SYEQFGGGGSLVAEW  | MERCI | POSITIVE | 2  |
| 145 | CTL-MPV-2 | 315-330 | YEQFGGGGSLVAEWF  | MERCI | POSITIVE | 2  |
| 146 | CTL-MPV-2 | 316-331 | EQFGGGGSLVAEWFL  | MERCI | POSITIVE | 2  |
| 147 | CTL-MPV-2 | 317-332 | QFGGGGSLVAEWFLA  | MERCI | POSITIVE | 2  |
| 148 | CTL-MPV-2 | 318-333 | FGGGGSLVAEWFLAY  | MERCI | POSITIVE | 2  |
| 149 | CTL-MPV-2 | 319-334 | GGGGSLVAEWFLAYI  | MERCI | POSITIVE | 2  |
| 150 | CTL-MPV-2 | 320-335 | GGGSLVAEWFLAYIL  | MERCI | POSITIVE | 2  |
| 151 | CTL-MPV-2 | 321-336 | GGSLVAEWFLAYILF  | MERCI | POSITIVE | 2  |
| 152 | CTL-MPV-2 | 322-337 | GSLVAEWFLAYILFT  | MERCI | POSITIVE | 2  |
| 153 | CTL-MPV-2 | 323-338 | SLVAEWFLAYILFTR  | MERCI | POSITIVE | 1  |
| 154 | CTL-MPV-2 | 481-496 | GSTACTDDNALAYYG  | MERCI | POSITIVE | 5  |
| 155 | CTL-MPV-2 | 482-497 | STACTDDNALAYYGG  | MERCI | POSITIVE | 5  |
| 156 | CTL-MPV-2 | 483-498 | TACTDDNALAYYGGG  | MERCI | POSITIVE | 4  |
| 157 | CTL-MPV-2 | 484-499 | ACTDDNALAYYGGGG  | MERCI | POSITIVE | 1  |
| 158 | CTL-MPV-2 | 485-500 | CTDDNALAYYGGGGS  | MERCI | POSITIVE | 1  |
| 159 | CTL-MPV-2 | 486-501 | TDDNALAYYGGGGSY  | MERCI | POSITIVE | 1  |
| 160 | CTL-MPV-2 | 487-502 | DDNALAYYGGGGSYT  | MERCI | POSITIVE | 1  |

| 161   | CTL-MPV-2 | 544-559   | GGGGSVDTFVNEFY   | MERCI  | POSITIVE | 1     |
|-------|-----------|-----------|------------------|--------|----------|-------|
| 162   | CTL-MPV-2 | 545-560   | GGGSDVDFVNEFYA   | MERCI  | POSITIVE | 1     |
| 163   | CTL-MPV-2 | 546-561   | GGSDVDFVNEFYAY   | MERCI  | POSITIVE | 1     |
| 164   | CTL-MPV-2 | 547-562   | GSVDVDFVNEFYAYL  | MERCI  | POSITIVE | 1     |
| 165   | CTL-MPV-2 | 658-673   | STRGRKCCRRKKHHH  | MERCI  | POSITIVE | 1     |
| 166   | CTL-MPV-2 | 659-674   | TRGRKCCRRKKHHHH  | MERCI  | POSITIVE | 1     |
| 167   | CTL-MPV-2 | 660-675   | RGRKCCRRKKHHHHH  | MERCI  | POSITIVE | 1     |
| 168   | CTL-MPV-2 | 661-676   | GRKCCRRKKHHHHHH  | MERCI  | POSITIVE | 2     |
| 169   | CTL-MPV-2 | 662-677   | RKCCRRKKHHHHHHH  | MERCI  | POSITIVE | 2     |
| 170   | CTL-MPV-2 | 663-678   | KCCRRKKHHHHHHH   | MERCI  | POSITIVE | 1     |
| 171   | CTL-MPV-2 | 664-679   | CCRRKKHHHHHHH    | MERCI  | POSITIVE | 1     |
| 172   | CTL-MPV-2 | 665-680   | CRRKKHHHHHHH     | MERCI  | POSITIVE | 1     |
| 173   | CTL-MPV-2 | 666-681   | RRKKHHHHHHH      | MERCI  | POSITIVE | 1     |
| 174   | CTL-MPV-2 | 667-682   | RKKHHHHHHH       | MERCI  | POSITIVE | 1     |
| S.No. | CTL MPV   | Start-END | Sequence         | Method | Result   | Score |
| 175   | CTL-MPV-3 | 21-36     | RRYKQIGTCGLPGTK  | MERCI  | POSITIVE | 1     |
| 176   | CTL-MPV-3 | 22-37     | RYKQIGTCGLPGTKC  | MERCI  | POSITIVE | 1     |
| 177   | CTL-MPV-3 | 23-38     | YKQIGTCGLPGTKCC  | MERCI  | POSITIVE | 1     |
| 178   | CTL-MPV-3 | 24-39     | KQIGTCGLPGTKCCK  | MERCI  | POSITIVE | 1     |
| 179   | CTL-MPV-3 | 25-40     | QIGTCGLPGTKCCKK  | MERCI  | POSITIVE | 1     |
| 180   | CTL-MPV-3 | 37-52     | CKKPEAAKSEETGT   | MERCI  | POSITIVE | 2     |
| 181   | CTL-MPV-3 | 38-53     | KKPEAAKSEETGTL   | MERCI  | POSITIVE | 1     |
| 182   | CTL-MPV-3 | 39-54     | KPEAAKSEETGTLI   | MERCI  | POSITIVE | 1     |
| 183   | CTL-MPV-3 | 40-55     | PEAAKSEETGTLIV   | MERCI  | POSITIVE | 1     |
| 184   | CTL-MPV-3 | 41-56     | EAAKSEETGTLIVN   | MERCI  | POSITIVE | 1     |
| 185   | CTL-MPV-3 | 42-57     | AAKSEETGTLIVNS   | MERCI  | POSITIVE | 1     |
| 186   | CTL-MPV-3 | 43-58     | AAKSEETGTLIVNSV  | MERCI  | POSITIVE | 1     |
| 187   | CTL-MPV-3 | 118-133   | FTIGTVTLKGGGGST  | MERCI  | POSITIVE | 2     |
| 188   | CTL-MPV-3 | 119-134   | TIGTVTLKGGGGSTI  | MERCI  | POSITIVE | 2     |
| 189   | CTL-MPV-3 | 120-135   | IGTVTLKGGGGSTIP  | MERCI  | POSITIVE | 1     |
| 190   | CTL-MPV-3 | 121-136   | GTVTLKGGGGSTIPI  | MERCI  | POSITIVE | 1     |
| 191   | CTL-MPV-3 | 122-137   | TVTLKGGGGSTIPIQ  | MERCI  | POSITIVE | 1     |
| 192   | CTL-MPV-3 | 158-173   | SKIITLKKRWGGGGGS | MERCI  | POSITIVE | 1     |
| 193   | CTL-MPV-3 | 159-174   | KIITLKKRWGGGGSH  | MERCI  | POSITIVE | 1     |
| 194   | CTL-MPV-3 | 160-175   | IITLKKRWGGGGSHF  | MERCI  | POSITIVE | 1     |
| 195   | CTL-MPV-3 | 161-176   | ITLKKRWGGGGSHFV  | MERCI  | POSITIVE | 1     |
| 196   | CTL-MPV-3 | 162-177   | TLKKRWGGGGSHFVC  | MERCI  | POSITIVE | 1     |
| 197   | CTL-MPV-3 | 199-214   | APFLYLYALVYFLQS  | MERCI  | POSITIVE | 1     |
| 198   | CTL-MPV-3 | 200-215   | PFLYLYALVYFLQSI  | MERCI  | POSITIVE | 2     |
| 199   | CTL-MPV-3 | 201-216   | FLYLYALVYFLQSIN  | MERCI  | POSITIVE | 2     |
| 200   | CTL-MPV-3 | 202-217   | LYLYALVYFLQSINF  | MERCI  | POSITIVE | 2     |

|     |           |         |                 |       |          |   |
|-----|-----------|---------|-----------------|-------|----------|---|
| 201 | CTL-MPV-3 | 203-218 | YLYALVYFLQSINFV | MERCI | POSITIVE | 2 |
| 202 | CTL-MPV-3 | 204-219 | LYALVYFLQSINFVR | MERCI | POSITIVE | 2 |
| 203 | CTL-MPV-3 | 205-220 | YALVYFLQSINFVRI | MERCI | POSITIVE | 2 |
| 204 | CTL-MPV-3 | 206-221 | ALVYFLQSINFVRII | MERCI | POSITIVE | 2 |
| 205 | CTL-MPV-3 | 220-235 | IMRLWLCWKCRGGGG | MERCI | POSITIVE | 1 |
| 206 | CTL-MPV-3 | 221-236 | MRLWLCWKCRGGGGS | MERCI | POSITIVE | 1 |
| 207 | CTL-MPV-3 | 222-237 | RLWLCWKCRGGGGSY | MERCI | POSITIVE | 1 |
| 208 | CTL-MPV-3 | 223-238 | LWLCWKCRGGGGSYF | MERCI | POSITIVE | 1 |
| 209 | CTL-MPV-3 | 224-239 | WLCWKCRGGGGSYFL | MERCI | POSITIVE | 1 |
| 210 | CTL-MPV-3 | 233-248 | GGSYFLCWHTNCYDY | MERCI | POSITIVE | 1 |
| 211 | CTL-MPV-3 | 270-285 | GSYYQLYSTQLSTD  | MERCI | POSITIVE | 2 |
| 212 | CTL-MPV-3 | 271-286 | GSYYQLYSTQLSTD  | MERCI | POSITIVE | 2 |
| 213 | CTL-MPV-3 | 272-287 | SYYQLYSTQLSTD   | MERCI | POSITIVE | 2 |
| 214 | CTL-MPV-3 | 273-288 | YYQLYSTQLSTD    | MERCI | POSITIVE | 3 |
| 215 | CTL-MPV-3 | 274-289 | YQLYSTQLSTD     | MERCI | POSITIVE | 2 |
| 216 | CTL-MPV-3 | 275-290 | QLYSTQLSTD      | MERCI | POSITIVE | 3 |
| 217 | CTL-MPV-3 | 276-291 | LYSTQLSTD       | MERCI | POSITIVE | 2 |
| 218 | CTL-MPV-3 | 277-292 | YSTQLSTD        | MERCI | POSITIVE | 2 |
| 219 | CTL-MPV-3 | 278-293 | STQLSTD         | MERCI | POSITIVE | 2 |
| 220 | CTL-MPV-3 | 279-294 | TQLSTD          | MERCI | POSITIVE | 2 |
| 221 | CTL-MPV-3 | 280-295 | QLSTD           | MERCI | POSITIVE | 2 |
| 222 | CTL-MPV-3 | 281-296 | LSTD            | MERCI | POSITIVE | 1 |
| 223 | CTL-MPV-3 | 362-377 | GGGGSLLKEPCSSGT | MERCI | POSITIVE | 1 |
| 224 | CTL-MPV-3 | 363-378 | GGGGSLLKEPCSSGT | MERCI | POSITIVE | 1 |
| 225 | CTL-MPV-3 | 364-379 | GGGSLLKEPCSSGT  | MERCI | POSITIVE | 1 |
| 226 | CTL-MPV-3 | 365-380 | GGSLLKEPCSSGT   | MERCI | POSITIVE | 1 |
| 227 | CTL-MPV-3 | 366-381 | SLLKEPCSSGT     | MERCI | POSITIVE | 1 |
| 228 | CTL-MPV-3 | 515-530 | TVAAFGGGGSYVVDD | MERCI | POSITIVE | 1 |
| 229 | CTL-MPV-3 | 516-531 | VAAFGGGGSYVVDD  | MERCI | POSITIVE | 1 |
| 230 | CTL-MPV-3 | 517-532 | AAFGGGGSYVVDD   | MERCI | POSITIVE | 1 |
| 231 | CTL-MPV-3 | 518-533 | AFGGGGSYVVDD    | MERCI | POSITIVE | 1 |
| 232 | CTL-MPV-3 | 519-534 | FGGGGSYVVDD     | MERCI | POSITIVE | 1 |
| 233 | CTL-MPV-3 | 520-535 | GGGGSYVVDD      | MERCI | POSITIVE | 1 |
| 234 | CTL-MPV-3 | 521-536 | GGGSYVVDD       | MERCI | POSITIVE | 1 |
| 235 | CTL-MPV-3 | 522-537 | GGSYVVDD        | MERCI | POSITIVE | 1 |
| 236 | CTL-MPV-3 | 523-538 | GSYVVDD         | MERCI | POSITIVE | 1 |
| 237 | CTL-MPV-3 | 524-539 | SYVVDD          | MERCI | POSITIVE | 1 |
| 238 | CTL-MPV-3 | 525-540 | YVVDD           | MERCI | POSITIVE | 1 |
| 239 | CTL-MPV-3 | 526-541 | VVDD            | MERCI | POSITIVE | 1 |
| 240 | CTL-MPV-3 | 527-542 | VDD             | MERCI | POSITIVE | 1 |
| 241 | CTL-MPV-3 | 528-543 | DD              | MERCI | POSITIVE | 1 |

|     |           |         |                 |       |          |   |
|-----|-----------|---------|-----------------|-------|----------|---|
| 242 | CTL-MPV-3 | 529-544 | DPCPIHFYSKWYIRV | MERCI | POSITIVE | 1 |
| 243 | CTL-MPV-3 | 530-545 | PCPIHFYSKWYIRVG | MERCI | POSITIVE | 1 |
| 244 | CTL-MPV-3 | 531-546 | CPIHFYSKWYIRVGA | MERCI | POSITIVE | 1 |
| 245 | CTL-MPV-3 | 532-547 | PIHFYSKWYIRVGAR | MERCI | POSITIVE | 1 |
| 246 | CTL-MPV-3 | 533-548 | IHFYSKWYIRVGARK | MERCI | POSITIVE | 1 |
| 247 | CTL-MPV-3 | 534-549 | HFYSKWYIRVGARKS | MERCI | POSITIVE | 1 |
| 248 | CTL-MPV-3 | 672-687 | STRGRKCCRRKKHHH | MERCI | POSITIVE | 1 |
| 249 | CTL-MPV-3 | 673-688 | TRGRKCCRRKKHHHH | MERCI | POSITIVE | 1 |
| 250 | CTL-MPV-3 | 674-689 | RGRKCCRRKKHHHHH | MERCI | POSITIVE | 1 |
| 251 | CTL-MPV-3 | 675-690 | GRKCCRRKKHHHHHH | MERCI | POSITIVE | 2 |
| 252 | CTL-MPV-3 | 676-691 | RKCCRRKKHHHHHH  | MERCI | POSITIVE | 2 |
| 253 | CTL-MPV-3 | 677-692 | KCCRRKKHHHHHH   | MERCI | POSITIVE | 1 |
| 254 | CTL-MPV-3 | 678-693 | CCRRKKHHHHHH    | MERCI | POSITIVE | 1 |
| 255 | CTL-MPV-3 | 679-694 | CRRKKHHHHHH     | MERCI | POSITIVE | 1 |
| 256 | CTL-MPV-3 | 680-695 | RRKKHHHHHH      | MERCI | POSITIVE | 1 |
| 257 | CTL-MPV-3 | 681-696 | RKKHHHHHH       | MERCI | POSITIVE | 1 |

**Supplementary Table S8:** INF- $\gamma$  inducing POSITIVE epitopes with a score of 1 or more than 1, screened from the HTL MPVs.

| S.No. | HTL MPV   | Start-END | Sequence        | Method | Result   | Score |
|-------|-----------|-----------|-----------------|--------|----------|-------|
| 1     | HTL-MPV-1 | 21-36     | RRYKQIGTCGLPGTK | MERCI  | POSITIVE | 1     |
| 2     | HTL-MPV-1 | 22-37     | RYKQIGTCGLPGTKC | MERCI  | POSITIVE | 1     |
| 3     | HTL-MPV-1 | 23-38     | YKQIGTCGLPGTKCC | MERCI  | POSITIVE | 1     |
| 4     | HTL-MPV-1 | 24-39     | KQIGTCGLPGTKCCK | MERCI  | POSITIVE | 1     |
| 5     | HTL-MPV-1 | 25-40     | QIGTCGLPGTKCCKK | MERCI  | POSITIVE | 1     |
| 6     | HTL-MPV-1 | 37-52     | CKKPEAAAKVNSVLL | MERCI  | POSITIVE | 1     |
| 7     | HTL-MPV-1 | 110-125   | ARGGGSSRTLSYYK  | MERCI  | POSITIVE | 1     |
| 8     | HTL-MPV-1 | 111-126   | RGGGGSSRTLSYYKL | MERCI  | POSITIVE | 1     |
| 9     | HTL-MPV-1 | 112-127   | GGGGSSRTLSYYKLG | MERCI  | POSITIVE | 1     |
| 10    | HTL-MPV-1 | 113-128   | GGSSRTLSYYKLGAS | MERCI  | POSITIVE | 1     |
| 11    | HTL-MPV-1 | 114-129   | GGSSRTLSYYKLGAS | MERCI  | POSITIVE | 1     |
| 12    | HTL-MPV-1 | 115-130   | GSSRTLSYYKLGASQ | MERCI  | POSITIVE | 1     |
| 13    | HTL-MPV-1 | 116-131   | SSRTLSYYKLGASQR | MERCI  | POSITIVE | 1     |
| 14    | HTL-MPV-1 | 117-132   | SRTLSYYKLGASQRV | MERCI  | POSITIVE | 1     |
| 15    | HTL-MPV-1 | 155-170   | VVIKVCEGGGGSREF | MERCI  | POSITIVE | 2     |
| 16    | HTL-MPV-1 | 156-171   | VIKVCEGGGGSREFV | MERCI  | POSITIVE | 1     |
| 17    | HTL-MPV-1 | 157-172   | IKVCEGGGGSREFVF | MERCI  | POSITIVE | 1     |
| 18    | HTL-MPV-1 | 158-173   | KVCEGGGGSREFVFK | MERCI  | POSITIVE | 1     |
| 19    | HTL-MPV-1 | 159-174   | VCEGGGGSREFVFKN | MERCI  | POSITIVE | 1     |

|    |           |         |                  |       |          |   |
|----|-----------|---------|------------------|-------|----------|---|
| 20 | HTL-MPV-1 | 160-175 | CEGGGSREFVFKNI   | MERCI | POSITIVE | 1 |
| 21 | HTL-MPV-1 | 161-176 | EGGGGSREFVFKNID  | MERCI | POSITIVE | 1 |
| 22 | HTL-MPV-1 | 162-177 | GGGGGSREFVFKNIDG | MERCI | POSITIVE | 1 |
| 23 | HTL-MPV-1 | 163-178 | GGGSREFVFKNIDGY  | MERCI | POSITIVE | 1 |
| 24 | HTL-MPV-1 | 169-184 | FVFKNIDGYFKIYSK  | MERCI | POSITIVE | 1 |
| 25 | HTL-MPV-1 | 170-185 | VFKNIDGYFKIYSKG  | MERCI | POSITIVE | 1 |
| 26 | HTL-MPV-1 | 171-186 | FKNIDGYFKIYSKGG  | MERCI | POSITIVE | 1 |
| 27 | HTL-MPV-1 | 172-187 | KNIDGYFKIYSKGGG  | MERCI | POSITIVE | 1 |
| 28 | HTL-MPV-1 | 173-188 | NIDGYFKIYSKGGGG  | MERCI | POSITIVE | 1 |
| 29 | HTL-MPV-1 | 174-189 | IDGYFKIYSKGGGGS  | MERCI | POSITIVE | 1 |
| 30 | HTL-MPV-1 | 227-242 | GGGGSQPTESIVRFP  | MERCI | POSITIVE | 1 |
| 31 | HTL-MPV-1 | 228-243 | GGGSQPTESIVRFPN  | MERCI | POSITIVE | 5 |
| 32 | HTL-MPV-1 | 229-244 | GGSQPTESIVRFPNI  | MERCI | POSITIVE | 5 |
| 33 | HTL-MPV-1 | 230-245 | GSQPTESIVRFPNIT  | MERCI | POSITIVE | 8 |
| 34 | HTL-MPV-1 | 231-246 | SQPTESIVRFPNITN  | MERCI | POSITIVE | 8 |
| 35 | HTL-MPV-1 | 232-247 | QPTESIVRFPNITNL  | MERCI | POSITIVE | 7 |
| 36 | HTL-MPV-1 | 279-294 | YADSFVIRGDEVRQI  | MERCI | POSITIVE | 2 |
| 37 | HTL-MPV-1 | 280-295 | ADSFVIRGDEVRQIA  | MERCI | POSITIVE | 2 |
| 38 | HTL-MPV-1 | 281-296 | DSFVIRGDEVRQIAP  | MERCI | POSITIVE | 2 |
| 39 | HTL-MPV-1 | 282-297 | SFVIRGDEVRQIAPG  | MERCI | POSITIVE | 2 |
| 40 | HTL-MPV-1 | 283-298 | FVIRGDEVRQIAPGQ  | MERCI | POSITIVE | 2 |
| 41 | HTL-MPV-1 | 363-378 | ANLAGGGGSREGVFFV | MERCI | POSITIVE | 1 |
| 42 | HTL-MPV-1 | 364-379 | NLAGGGGSREGVFFVS | MERCI | POSITIVE | 1 |
| 43 | HTL-MPV-1 | 365-380 | LAGGGGSREGVFFVSN | MERCI | POSITIVE | 1 |
| 44 | HTL-MPV-1 | 366-381 | AGGGGSREGVFFVSN  | MERCI | POSITIVE | 1 |
| 45 | HTL-MPV-1 | 367-382 | GGGGGSREGVFFVSN  | MERCI | POSITIVE | 1 |
| 46 | HTL-MPV-1 | 368-383 | GGGSREGVFFVSN    | MERCI | POSITIVE | 1 |
| 47 | HTL-MPV-1 | 469-484 | GGSWPQIAQFAPSAS  | MERCI | POSITIVE | 1 |
| 48 | HTL-MPV-1 | 470-485 | GSWPQIAQFAPSASA  | MERCI | POSITIVE | 1 |
| 49 | HTL-MPV-1 | 471-486 | SWPQIAQFAPSASAF  | MERCI | POSITIVE | 1 |
| 50 | HTL-MPV-1 | 472-487 | WPQIAQFAPSASAFF  | MERCI | POSITIVE | 1 |
| 51 | HTL-MPV-1 | 473-488 | PQIAQFAPSASAFFG  | MERCI | POSITIVE | 1 |
| 52 | HTL-MPV-1 | 474-489 | QIAQFAPSASAFFGM  | MERCI | POSITIVE | 1 |
| 53 | HTL-MPV-1 | 542-557 | APFLYLYALVYFLQS  | MERCI | POSITIVE | 1 |
| 54 | HTL-MPV-1 | 543-558 | PFLYLYALVYFLQSI  | MERCI | POSITIVE | 2 |
| 55 | HTL-MPV-1 | 544-559 | FLYLYALVYFLQSIN  | MERCI | POSITIVE | 2 |
| 56 | HTL-MPV-1 | 545-560 | LYLYALVYFLQSINF  | MERCI | POSITIVE | 2 |
| 57 | HTL-MPV-1 | 546-561 | YLYALVYFLQSINFV  | MERCI | POSITIVE | 2 |
| 58 | HTL-MPV-1 | 547-562 | LYALVYFLQSINFG   | MERCI | POSITIVE | 2 |
| 59 | HTL-MPV-1 | 548-563 | YALVYFLQSINFGG   | MERCI | POSITIVE | 2 |
| 60 | HTL-MPV-1 | 549-564 | ALVYFLQSINFGGG   | MERCI | POSITIVE | 2 |



| 61    | HTL-MPV-1 | 550-565   | LVYFLQSINFVGGGG | MERCI  | POSITIVE | 2     |
|-------|-----------|-----------|-----------------|--------|----------|-------|
| 62    | HTL-MPV-1 | 551-566   | VYFLQSINFVGGGGS | MERCI  | POSITIVE | 2     |
| 63    | HTL-MPV-1 | 568-583   | GVEHVTFIYNKIVD  | MERCI  | POSITIVE | 2     |
| 64    | HTL-MPV-1 | 569-584   | VEHVTFIYNKIVDE  | MERCI  | POSITIVE | 4     |
| 65    | HTL-MPV-1 | 570-585   | EHVTFIYNKIVDEP  | MERCI  | POSITIVE | 4     |
| 66    | HTL-MPV-1 | 571-586   | HVTFIYNKIVDEPE  | MERCI  | POSITIVE | 4     |
| 67    | HTL-MPV-1 | 572-587   | VTFIYNKIVDEPEE  | MERCI  | POSITIVE | 4     |
| 68    | HTL-MPV-1 | 573-588   | TFIYNKIVDEPEEH  | MERCI  | POSITIVE | 4     |
| 69    | HTL-MPV-1 | 574-589   | FFIYNKIVDEPEEHV | MERCI  | POSITIVE | 2     |
| 70    | HTL-MPV-1 | 575-590   | FIYNKIVDEPEEHVE | MERCI  | POSITIVE | 1     |
| 71    | HTL-MPV-1 | 579-594   | KIVDEPEEHVEAAAK | MERCI  | POSITIVE | 1     |
| 72    | HTL-MPV-1 | 580-595   | IVDEPEEHVEAAAKG | MERCI  | POSITIVE | 1     |
| 73    | HTL-MPV-1 | 581-596   | VDEPEEHVEAAAKGI | MERCI  | POSITIVE | 1     |
| 74    | HTL-MPV-1 | 582-597   | STRGRKCCRKKHHH  | MERCI  | POSITIVE | 1     |
| 75    | HTL-MPV-1 | 583-598   | TRGRKCCRKKHHHH  | MERCI  | POSITIVE | 1     |
| 76    | HTL-MPV-1 | 584-599   | RGRKCCRKKHHHHH  | MERCI  | POSITIVE | 1     |
| 77    | HTL-MPV-1 | 585-600   | GRKCCRKKHHHHHH  | MERCI  | POSITIVE | 2     |
| 78    | HTL-MPV-1 | 586-601   | RKCCRKKHHHHHH   | MERCI  | POSITIVE | 2     |
| 79    | HTL-MPV-1 | 587-602   | KCCRKKHHHHHH    | MERCI  | POSITIVE | 1     |
| 80    | HTL-MPV-1 | 588-603   | CCRKKHHHHHH     | MERCI  | POSITIVE | 1     |
| 81    | HTL-MPV-1 | 589-604   | CRRKKHHHHHH     | MERCI  | POSITIVE | 1     |
| 82    | HTL-MPV-1 | 590-605   | RRKKHHHHHH      | MERCI  | POSITIVE | 1     |
| 83    | HTL-MPV-1 | 591-606   | RKKHHHHHH       | MERCI  | POSITIVE | 1     |
| S.No. | CTL MPV   | Start-END | Sequence        | Method | Result   | Score |
| 84    | HTL-MPV-2 | 21-36     | RRYKQIGTCGLPGTK | MERCI  | POSITIVE | 1     |
| 85    | HTL-MPV-2 | 22-37     | RYKQIGTCGLPGTKC | MERCI  | POSITIVE | 1     |
| 86    | HTL-MPV-2 | 23-38     | YKQIGTCGLPGTKCC | MERCI  | POSITIVE | 1     |
| 87    | HTL-MPV-2 | 24-39     | KQIGTCGLPGTKCCK | MERCI  | POSITIVE | 1     |
| 88    | HTL-MPV-2 | 25-40     | QIGTCGLPGTKCCKK | MERCI  | POSITIVE | 1     |
| 89    | HTL-MPV-2 | 114-129   | QQESPVMMSAPPAQ  | MERCI  | POSITIVE | 2     |
| 90    | HTL-MPV-2 | 137-152   | LLQLCTFTRSTNSRI | MERCI  | POSITIVE | 1     |
| 91    | HTL-MPV-2 | 138-153   | LQLCTFTRSTNSRIK | MERCI  | POSITIVE | 1     |
| 92    | HTL-MPV-2 | 139-154   | QLCTFTRSTNSRIKA | MERCI  | POSITIVE | 1     |
| 93    | HTL-MPV-2 | 140-155   | LCTFTRSTNSRIKAS | MERCI  | POSITIVE | 1     |
| 94    | HTL-MPV-2 | 170-185   | FLLSVCLGGGGSEW  | MERCI  | POSITIVE | 1     |
| 95    | HTL-MPV-2 | 171-186   | LLSVCLGGGGSEWF  | MERCI  | POSITIVE | 1     |
| 96    | HTL-MPV-2 | 172-187   | LLSVCLGGGGSEWFL | MERCI  | POSITIVE | 1     |
| 97    | HTL-MPV-2 | 173-188   | LSVCLGGGGSEWFLA | MERCI  | POSITIVE | 1     |
| 98    | HTL-MPV-2 | 174-189   | SVCLGGGGSEWFLAY | MERCI  | POSITIVE | 1     |
| 99    | HTL-MPV-2 | 175-190   | VCLGGGGSEWFLAYI | MERCI  | POSITIVE | 1     |
| 100   | HTL-MPV-2 | 176-191   | CLGGGGSEWFLAYIL | MERCI  | POSITIVE | 1     |

|     |           |         |                 |       |          |   |
|-----|-----------|---------|-----------------|-------|----------|---|
| 101 | HTL-MPV-2 | 177-192 | LGGGGSEWFLAYILF | MERCI | POSITIVE | 1 |
| 102 | HTL-MPV-2 | 178-193 | GGGGSEWFLAYILFT | MERCI | POSITIVE | 1 |
| 103 | HTL-MPV-2 | 179-194 | GGGSEWFLAYILFTR | MERCI | POSITIVE | 1 |
| 104 | HTL-MPV-2 | 185-200 | FLAYILFTRFFYVLG | MERCI | POSITIVE | 1 |
| 105 | HTL-MPV-2 | 186-201 | LAYILFTRFFYVLGL | MERCI | POSITIVE | 1 |
| 106 | HTL-MPV-2 | 187-202 | AYILFTRFFYVLGLA | MERCI | POSITIVE | 1 |
| 107 | HTL-MPV-2 | 188-203 | YILFTRFFYVLGLAA | MERCI | POSITIVE | 1 |
| 108 | HTL-MPV-2 | 198-213 | LGLAAIMQLFFSYFA | MERCI | POSITIVE | 1 |
| 109 | HTL-MPV-2 | 199-214 | GLAAIMQLFFSYFAV | MERCI | POSITIVE | 1 |
| 110 | HTL-MPV-2 | 200-215 | LAAIMQLFFSYFAVH | MERCI | POSITIVE | 1 |
| 111 | HTL-MPV-2 | 201-216 | AAIMQLFFSYFAVHF | MERCI | POSITIVE | 1 |
| 112 | HTL-MPV-2 | 202-217 | AIMQLFFSYFAVHFI | MERCI | POSITIVE | 1 |
| 113 | HTL-MPV-2 | 203-218 | IMQLFFSYFAVHFIS | MERCI | POSITIVE | 1 |
| 114 | HTL-MPV-2 | 204-219 | MQLFFSYFAVHFISN | MERCI | POSITIVE | 2 |
| 115 | HTL-MPV-2 | 205-220 | QLFFSYFAVHFISNS | MERCI | POSITIVE | 2 |
| 116 | HTL-MPV-2 | 206-221 | LFFSYFAVHFISNSW | MERCI | POSITIVE | 2 |
| 117 | HTL-MPV-2 | 207-222 | FFSYFAVHFISNSWL | MERCI | POSITIVE | 1 |
| 118 | HTL-MPV-2 | 364-379 | VQSTQWSLFFFLYEN | MERCI | POSITIVE | 1 |
| 119 | HTL-MPV-2 | 365-380 | QSTQWSLFFFLYENA | MERCI | POSITIVE | 1 |
| 120 | HTL-MPV-2 | 366-381 | STQWSLFFFLYENAF | MERCI | POSITIVE | 1 |
| 121 | HTL-MPV-2 | 367-382 | TQWSLFFFLYENAFL | MERCI | POSITIVE | 1 |
| 122 | HTL-MPV-2 | 368-383 | QWSLFFFLYENAFLP | MERCI | POSITIVE | 1 |
| 123 | HTL-MPV-2 | 369-384 | WSLFFFLYENAFLPG | MERCI | POSITIVE | 1 |
| 124 | HTL-MPV-2 | 370-385 | SLFFFLYENAFLPGG | MERCI | POSITIVE | 1 |
| 125 | HTL-MPV-2 | 371-386 | LFFFLYENAFLPGGG | MERCI | POSITIVE | 1 |
| 126 | HTL-MPV-2 | 372-387 | FFFLYENAFLPGGGG | MERCI | POSITIVE | 1 |
| 127 | HTL-MPV-2 | 381-396 | LPGGGGSQAIASEFS | MERCI | POSITIVE | 2 |
| 128 | HTL-MPV-2 | 382-397 | PGGGGSQAIASEFSS | MERCI | POSITIVE | 2 |
| 129 | HTL-MPV-2 | 383-398 | GGGGSQAIASEFSSL | MERCI | POSITIVE | 2 |
| 130 | HTL-MPV-2 | 384-399 | GGGSQAIASEFSSLP | MERCI | POSITIVE | 2 |
| 131 | HTL-MPV-2 | 385-400 | GGSQAIASEFSSLPS | MERCI | POSITIVE | 2 |
| 132 | HTL-MPV-2 | 386-401 | GSQAIASEFSSLPSY | MERCI | POSITIVE | 2 |
| 133 | HTL-MPV-2 | 387-402 | SQAIASEFSSLPSYA | MERCI | POSITIVE | 2 |
| 134 | HTL-MPV-2 | 388-403 | QAIASEFSSLPSYAA | MERCI | POSITIVE | 2 |
| 135 | HTL-MPV-2 | 389-404 | AIASEFSSLPSYAAF | MERCI | POSITIVE | 2 |
| 136 | HTL-MPV-2 | 409-424 | GSTQMNLKYAISAKN | MERCI | POSITIVE | 1 |
| 137 | HTL-MPV-2 | 410-425 | STQMNLKYAISAKNR | MERCI | POSITIVE | 1 |
| 138 | HTL-MPV-2 | 411-426 | TQMNLKYAISAKNRA | MERCI | POSITIVE | 1 |
| 139 | HTL-MPV-2 | 412-427 | QMNLKYAISAKNRAR | MERCI | POSITIVE | 1 |
| 140 | HTL-MPV-2 | 413-428 | MNLKYAISAKNRART | MERCI | POSITIVE | 1 |
| 141 | HTL-MPV-2 | 414-429 | NLKYAISAKNRARTG | MERCI | POSITIVE | 1 |

|     |           |         |                  |       |          |   |
|-----|-----------|---------|------------------|-------|----------|---|
| 142 | HTL-MPV-2 | 415-430 | LKYAISAKNRARTGG  | MERCI | POSITIVE | 1 |
| 143 | HTL-MPV-2 | 448-463 | ARKHGGGGSFVNEFY  | MERCI | POSITIVE | 2 |
| 144 | HTL-MPV-2 | 449-464 | RKHGGGGSFVNEFYA  | MERCI | POSITIVE | 2 |
| 145 | HTL-MPV-2 | 450-465 | KHGGGGSFVNEFYAY  | MERCI | POSITIVE | 2 |
| 146 | HTL-MPV-2 | 451-466 | HGGGGSFVNEFYAYL  | MERCI | POSITIVE | 2 |
| 147 | HTL-MPV-2 | 452-467 | GGGGSFVNEFYAYLR  | MERCI | POSITIVE | 2 |
| 148 | HTL-MPV-2 | 453-468 | GGGSFVNEFYAYLRK  | MERCI | POSITIVE | 2 |
| 149 | HTL-MPV-2 | 454-469 | GGSFVNEFYAYLRKH  | MERCI | POSITIVE | 2 |
| 150 | HTL-MPV-2 | 455-470 | GSFVNEFYAYLRKHF  | MERCI | POSITIVE | 2 |
| 151 | HTL-MPV-2 | 456-471 | SFVNEFYAYLRKHFS  | MERCI | POSITIVE | 2 |
| 152 | HTL-MPV-2 | 518-533 | RYGGGGSFAWWTAFV  | MERCI | POSITIVE | 1 |
| 153 | HTL-MPV-2 | 519-534 | YGGGGSFAWWTAFVT  | MERCI | POSITIVE | 1 |
| 154 | HTL-MPV-2 | 520-535 | GGGGSFAWWTAFVTN  | MERCI | POSITIVE | 1 |
| 155 | HTL-MPV-2 | 521-536 | GGGSFAWWTAFVTNV  | MERCI | POSITIVE | 1 |
| 156 | HTL-MPV-2 | 522-537 | GGSFAWWTAFVTNVN  | MERCI | POSITIVE | 1 |
| 157 | HTL-MPV-2 | 523-538 | GSFAWWTAFVTNVNA  | MERCI | POSITIVE | 1 |
| 158 | HTL-MPV-2 | 524-539 | SFAWWTAFVTNVNAS  | MERCI | POSITIVE | 1 |
| 159 | HTL-MPV-2 | 525-540 | FAWWTAFVTNVNASS  | MERCI | POSITIVE | 1 |
| 160 | HTL-MPV-2 | 526-541 | AWWTAFVTNVNASSS  | MERCI | POSITIVE | 1 |
| 161 | HTL-MPV-2 | 655-670 | GGGCTQHQPYYVDD   | MERCI | POSITIVE | 1 |
| 162 | HTL-MPV-2 | 656-671 | GGCTQHQPYYVDDP   | MERCI | POSITIVE | 1 |
| 163 | HTL-MPV-2 | 657-672 | GSCTQHQPYYVDDPC  | MERCI | POSITIVE | 1 |
| 164 | HTL-MPV-2 | 658-673 | SCTQHQPYYVDDPCP  | MERCI | POSITIVE | 1 |
| 165 | HTL-MPV-2 | 659-674 | CTQHQPYYVDDPCPI  | MERCI | POSITIVE | 1 |
| 166 | HTL-MPV-2 | 660-675 | TQHQPYYVDDPCPIH  | MERCI | POSITIVE | 1 |
| 167 | HTL-MPV-2 | 661-676 | QHQPYYVDDPCPIHF  | MERCI | POSITIVE | 1 |
| 168 | HTL-MPV-2 | 662-677 | HQPYYVDDPCPIH FY | MERCI | POSITIVE | 1 |
| 169 | HTL-MPV-2 | 663-678 | QPYVDDPCPIHFYS   | MERCI | POSITIVE | 1 |
| 170 | HTL-MPV-2 | 664-679 | PYVDDPCPIHFYSG   | MERCI | POSITIVE | 1 |
| 171 | HTL-MPV-2 | 665-680 | YVDDPCPIHFYSGG   | MERCI | POSITIVE | 1 |
| 172 | HTL-MPV-2 | 740-755 | STRGRKCCRRKKHHH  | MERCI | POSITIVE | 1 |
| 173 | HTL-MPV-2 | 741-756 | TRGRKCCRRKKHHHH  | MERCI | POSITIVE | 1 |
| 174 | HTL-MPV-2 | 742-757 | RGRKCCRRKKHHHHH  | MERCI | POSITIVE | 1 |
| 175 | HTL-MPV-2 | 743-758 | GRKCCRRKKHHHHHH  | MERCI | POSITIVE | 2 |
| 176 | HTL-MPV-2 | 744-759 | RKCCRRKKHHHHHH   | MERCI | POSITIVE | 2 |
| 177 | HTL-MPV-2 | 745-760 | KCCRRKKHHHHHH    | MERCI | POSITIVE | 1 |
| 178 | HTL-MPV-2 | 746-761 | CCRRKKHHHHHH     | MERCI | POSITIVE | 1 |
| 179 | HTL-MPV-2 | 747-762 | CRRKKHHHHHH      | MERCI | POSITIVE | 1 |
| 180 | HTL-MPV-2 | 748-763 | RRKKHHHHHH       | MERCI | POSITIVE | 1 |
| 181 | HTL-MPV-2 | 749-764 | RKKHHHHHH        | MERCI | POSITIVE | 1 |

**Supplementary Table S9:** Parameters for the tertiary structure homology modeling of all the CTL and HTL MPVs by the I-TASSER tool.

| S.No. | MPVs      | PDB hit | C-Score | TM-Score    | RMSD (Å)   |
|-------|-----------|---------|---------|-------------|------------|
| 1     | CTL-MPV-1 | 6cv0A   | -2.39   | 0.43 ± 0.14 | 14.5 ± 3.7 |
| 2     | CTL-MPV-2 | 5n8pA   | -0.64   | 0.63 ± 0.13 | 9.5 ± 4.6  |
| 3     | CTL-MPV-3 | 6s7tA   | -1.23   | 0.56 ± 0.15 | 11.0 ± 4.6 |
| 4     | HTL-MPV-1 | 6p2mA   | -1.67   | 0.51 ± 0.15 | 11.9 ± 4.4 |
| 5     | HTL-MPV-2 | 5kdvA   | -0.82   | 0.61 ± 0.14 | 10.2 ± 4.6 |

**Supplementary Table S10:** Refinement parameter values for CTL and HTL MPV models after refinement by GalaxyRefine tool.

| S.No. | MPV Models | GDT-HA | RMSD  | MolProbity | Clash score | Poor rotamers | Rama favored |
|-------|------------|--------|-------|------------|-------------|---------------|--------------|
| 1     | CTL-MPV-1  | 0.8652 | 0.632 | 2.594      | 18.6        | 1.7           | 85.2         |
| 2     | CTL-MPV-2  | 0.9452 | 0.427 | 2.55       | 22.3        | 1.4           | 88.3         |
| 3     | CTL-MPV-3  | 0.9311 | 0.474 | 2.398      | 20.4        | 0.7           | 88.2         |
| 4     | HTL-MPV-1  | 0.9239 | 0.477 | 2.577      | 26.6        | 1.1           | 85.7         |
| 5     | HTL-MPV-2  | 0.9488 | 0.425 | 2.494      | 22.1        | 1.4           | 89.8         |

**MolProbity** score indicates the log-weighted combination score of the clash score, the percentage of Ramachandran not favored residues and the percentage of bad side-chain rotamers

**Clash score:** number of atomic clashes per 1000 atoms.

**Poor rotamers:** the percentages of rotamer outliers

**RMSD** value in Å indicated deviation from initial model.

**GDT-HA** (global distance test-High Accuracy): backbone structure accuracy measured by GDT-HA

**Rama favored** is the percentage of residues which come in the favored region of the Ramachandran plot

**Supplementary Table S11:** B cell linear epitopes screened from CTL MPVs.

| CTL MPV   | No. | Start | End | B Cell Linear Epitopes                                         | Number of residues | Score |
|-----------|-----|-------|-----|----------------------------------------------------------------|--------------------|-------|
| CTL-MPV-1 | 1   | 309   | 372 | FRVYSSANNCTFEYVSQPFLGGGSKQGNFKNLREFVFNIDGYFKIYSKHTPIGGGGSEPLVD | 64                 | 0.773 |
| CTL-MPV-1 | 2   | 380   | 440 | TRFQTLLAGGGGSTPGDSSSGWTAGAAAYVGYLQPRFTLLKGGGSSSETKCTKLSFTVEK   | 61                 | 0.725 |
| CTL-MPV-1 | 3   | 38    | 94  | CKKPEAAAKGTITVEELKKLLEQWNLVIGFLFTWICLLQFAYANRNRFLYIIKLIF       | 57                 | 0.787 |
| CTL-MPV-1 | 4   | 116   | 165 | SRINWITGGIAIAMAACLVGLMWLSYFIASFRLFARTSRMWSFNNGGGSKE            | 50                 | 0.675 |
| CTL-MPV-1 | 5   | 701   | 743 | AQYGGGSLQIPFAMQMAYRFNGIGGGGSPQSAPHGVVFGGG                      | 43                 | 0.785 |
| CTL-MPV-1 | 6   | 800   | 842 | YYCRVRGGRCVLSCLPKKEQIGKCSTRGRKCCRKHHHHHH                       | 43                 | 0.776 |
| CTL-MPV-1 | 7   | 587   | 624 | TGSNVFGGGSSPRRARSVASQSIAYGGGGSFTISVT                           | 38                 | 0.805 |
| CTL-MPV-1 | 8   | 455   | 482 | FPNITNLCPFGEVFNATRFASVGGGGSR                                   | 28                 | 0.653 |
| CTL-MPV-1 | 9   | 654   | 676 | AQVKQIYKTPPIKGGGSKRSFI                                         | 23                 | 0.557 |
| CTL-MPV-1 | 10  | 501   | 513 | TFKCYGGGGSNVY                                                  | 13                 | 0.71  |

| CTL MPV   | No. | Start | End | B Cell Linear Epitopes                                                                                 | Number of residues | Score |
|-----------|-----|-------|-----|--------------------------------------------------------------------------------------------------------|--------------------|-------|
| CTL-MPV-1 | 11  | 182   | 190 | SQRVAGDSG                                                                                              | 9                  | 0.528 |
| CTL-MPV-1 | 12  | 644   | 651 | GGGSNTQE                                                                                               | 8                  | 0.584 |
| CTL MPV   | No. | Start | End | B Cell Linear Epitopes                                                                                 | Number of residues | Score |
| CTL-MPV-2 | 1   | 577   | 675 | ANGQVFGLYGGGSIPLMYKGLPWNVVRGGGGSYVMHANYIFWEAAAKGIINTLQKYYCRVRRGGRCVLSCLPKEEQIGKCTRGRKCCRKKHHHHHH       | 99                 | 0.801 |
| CTL-MPV-2 | 2   | 1     | 105 | GIGDPVTLKSGAICHVPFCPRRYKQIGTCGLPGTKCCKKPEAAAKNQRNAPRITFGGSPGGGSRKQRRPQGLPNNTASWFTALTQHGKGGGGSNSPPDDQIG | 105                | 0.789 |
| CTL-MPV-2 | 3   | 351   | 367 | IFFASFYVWVSYGGGG                                                                                       | 17                 | 0.732 |
| CTL-MPV-2 | 4   | 332   | 343 | AYILFTRFFYVG                                                                                           | 12                 | 0.707 |
| CTL-MPV-2 | 5   | 374   | 389 | FSSTFNVPMEKGGGGG                                                                                       | 16                 | 0.677 |
| CTL-MPV-2 | 6   | 248   | 259 | FPPTEPKKGGGG                                                                                           | 12                 | 0.65  |
| CTL-MPV-2 | 7   | 188   | 198 | ELIRQGTDYGG                                                                                            | 11                 | 0.634 |
| CTL-MPV-2 | 8   | 310   | 321 | YMGTLSEYQFGG                                                                                           | 12                 | 0.613 |
| CTL-MPV-2 | 9   | 442   | 451 | VFGGGGSLPS                                                                                             | 10                 | 0.6   |
| CTL-MPV-2 | 10  | 548   | 566 | SVDTDFVNEFYAYLRKHFS                                                                                    | 19                 | 0.597 |
| CTL-MPV-2 | 11  | 272   | 278 | GGGGSET                                                                                                | 7                  | 0.588 |
| CTL-MPV-2 | 12  | 396   | 406 | MRFRRAFGGGG                                                                                            | 11                 | 0.566 |
| CTL-MPV-2 | 13  | 292   | 301 | TQVVDMSMTY                                                                                             | 10                 | 0.535 |
| CTL-MPV-2 | 14  | 527   | 534 | TYGGGGSA                                                                                               | 8                  | 0.533 |
| CTL MPV   | No. | Start | End | B Cell Linear Epitopes                                                                                 | Number of residues | Score |
| CTL-MPV-3 | 1   | 627   | 689 | YSLLLCREAAAKGIINTLQKYYCRVRRGGRCVLSCLPKEEQIGKCTRGRKCCRKKHHHHHH                                          | 63                 | 0.843 |
| CTL-MPV-3 | 2   | 316   | 365 | EILLIIMRTFKVSIWNLDYIIGGGGSMKIILFLALITLATCELYHYGGGG                                                     | 50                 | 0.814 |
| CTL-MPV-3 | 3   | 18    | 61  | VFCPRRYKQIGTCGLPGTKCCKKPEAAAKSEETGLIVNSVLLF                                                            | 44                 | 0.742 |
| CTL-MPV-3 | 4   | 481   | 515 | LLFLVLIIMLIIFWFSLELGGGGSMKFLVFLGIIT                                                                    | 35                 | 0.78  |
| CTL-MPV-3 | 5   | 590   | 608 | VRCSFYEDFLEYHDVVRVL                                                                                    | 19                 | 0.726 |
| CTL-MPV-3 | 6   | 106   | 122 | NSSRGGGGGFMRIFTIG                                                                                      | 17                 | 0.649 |
| CTL-MPV-3 | 7   | 537   | 551 | SKWYIRVGARKSAPL                                                                                        | 15                 | 0.645 |
| CTL-MPV-3 | 8   | 152   | 163 | LAVFQSASKIIT                                                                                           | 12                 | 0.734 |
| CTL-MPV-3 | 9   | 367   | 378 | LLKEPCSSGTYE                                                                                           | 12                 | 0.703 |
| CTL-MPV-3 | 10  | 75    | 86  | LTALRLCAYGGG                                                                                           | 12                 | 0.627 |
| CTL-MPV-3 | 11  | 277   | 288 | LYSTQLSTDTGV                                                                                           | 12                 | 0.605 |
| CTL-MPV-3 | 12  | 126   | 134 | LKGGGGSTI                                                                                              | 9                  | 0.642 |
| CTL-MPV-3 | 13  | 231   | 239 | RGGGGSYFL                                                                                              | 9                  | 0.522 |
| CTL-MPV-3 | 14  | 431   | 438 | SEVQELYS                                                                                               | 8                  | 0.59  |
| CTL-MPV-3 | 15  | 522   | 529 | GGSYVVDD                                                                                               | 8                  | 0.532 |

Supplementary Table S12: B cell Discontinuous epitopes screened from CTL MPVs.

| CTL MPV   | No. | B Cell Discontinuous Epitopes residues                                                                                                                                                                                                                                                                                                                                                                                                                                                                                                                                                                                                                           | Number of residues | Score |
|-----------|-----|------------------------------------------------------------------------------------------------------------------------------------------------------------------------------------------------------------------------------------------------------------------------------------------------------------------------------------------------------------------------------------------------------------------------------------------------------------------------------------------------------------------------------------------------------------------------------------------------------------------------------------------------------------------|--------------------|-------|
| CTL-MPV-1 | 1   | H838, H839, H840, H841                                                                                                                                                                                                                                                                                                                                                                                                                                                                                                                                                                                                                                           | 4                  | 0.901 |
| CTL-MPV-1 | 2   | T587, G588, S589, N590, V591, F592, G593, G594, G595, G596, S597, S598, P599, R600, R601, A602, R603, S604, V605, A606, S607, Q608, S609, I610, I611, A612, Y613, G614, G615, G616, G617, S618, F619, T620, I621, S622, V623, T624, E626, A714, M715, Q716, M717, A718, Y719, R720, F721, N722, G723, I724, G725, G726, G727, G728, S729, F730, P731, Q732, S733, A734, P735, H736, G737, V738, V739, F740, G741, G742, G743, L797, Y800, Y801, C802, R803, V804, R805, G806, G807, R808, C809, A810, V811, L812, S813, C814, L815, P816, K817, E818, E819, Q820, I821, G822, K823, C824, S825, T826, R827, G828, R829, K830, C831, C832, R833, K835, K836, H837 | 107                | 0.789 |
| CTL-MPV-1 | 3   | F309, R310, V311, Y312, S313, S314, A315, N316, N317, C318, T319, F320, E321, Y322, V323, S324, Q325, P326, F327, L328, G329, G330, G331, G332, S333, K334, Q335, G336, N337, F338, K339, N340, L341, R342, E343, V345, F346, K347, N348, I349, D350, G351, Y352, F353, K354, I355, Y356, S357, K358, H359, T360, P361, I362, G363, G364, G365, G366, S367, E368, P369, L370, V371, D372, L373, T380, R381, F382, Q383, T384, L385, L386, A387, G388, G389, G390, G391, S392, T393, P394, G395, D396,                                                                                                                                                            | 169                | 0.723 |



|           |            |                                                                                                                                                                                                                                                                                                                                                                                                                                                                                                                                                                                                                                                                                                                                                                        |                           |              |
|-----------|------------|------------------------------------------------------------------------------------------------------------------------------------------------------------------------------------------------------------------------------------------------------------------------------------------------------------------------------------------------------------------------------------------------------------------------------------------------------------------------------------------------------------------------------------------------------------------------------------------------------------------------------------------------------------------------------------------------------------------------------------------------------------------------|---------------------------|--------------|
|           |            | S397, S398, S399, G400, W401, T402, A403, G404, A405, A406, A407, Y408, Y409, V410, G411, Y412, L413, Q414, P415, R416, T417, F418, L419, L420, K421, G422, G423, G424, G425, S426, S427, E428, T429, K430, C431, T432, L433, K434, S435, F436, T437, V438, E439, K440, N447, F448, F455, P456, N457, I458, T459, N460, L461, C462, P463, F464, G465, E466, V467, F468, N469, A470, T471, R472, F473, A474, S475, V476, G477, G478, G479, G480, S481, R482, I483, T501, F502, K503, C504, Y505, G506, G507, G508, G509, S510, N511, V512, Y513                                                                                                                                                                                                                         |                           |              |
| CTL-MPV-1 | 4          | K39, K40, P41, E42, A43, A44, A45, K46, G47, T48, I49, T50, V51, E52, E53, L54, K55, K56, L57, L58, E59, Q60, W61, N62, L63, V64, I65, G66, F67, L68, F69, L70, T71, W72, I73, C74, L75, L76, Q77, F78, A79, Y80, A81, N82, R83, N84, R85, F86, L87, Y88, I89, I90, K91, L92, I93, F94, L95, G113, G114, G115, R117, I118, N119, W120, I121, T122, G123, G124, I125, A126, I127, A128, M129, A130, C131, L132, V133, G134, L135, M136, W137, L138, S139, Y140, F141, I142, A143, S144, F145, R146, V185, A186, G187, D188, S189, G190, F191, Y194, D231, V233, R235, T245, Q246, D247, L248                                                                                                                                                                            | 105                       | 0.721        |
| CTL-MPV-1 | 5          | K666, G667, G668, G669, G670, S671, K672, R673, S674, F675, A701, Q702, G704, G705, G706, G707, S708, L709, Q710, I711, P712, F713                                                                                                                                                                                                                                                                                                                                                                                                                                                                                                                                                                                                                                     | 22                        | 0.636        |
| CTL-MPV-1 | 6          | R152, S153, M154, W155, S156, F157, N158, G159, G160, G161, G162, S163, K164, E165, S209, T210, T211, R212                                                                                                                                                                                                                                                                                                                                                                                                                                                                                                                                                                                                                                                             | 18                        | 0.57         |
| CTL-MPV-1 | 7          | S636, V637, D638, T640, G643, G644, G645, G646, S647, N648, Q650, E651, A654, Q655, K657, Q658, I659, Y660                                                                                                                                                                                                                                                                                                                                                                                                                                                                                                                                                                                                                                                             | 18                        | 0.554        |
| CTL MPV   | <b>No.</b> | <b>B Cell Discontinuous Epitopes residues</b>                                                                                                                                                                                                                                                                                                                                                                                                                                                                                                                                                                                                                                                                                                                          | <b>Number of residues</b> | <b>Score</b> |
| CTL-MPV-2 | 1          | R667, K669, H670                                                                                                                                                                                                                                                                                                                                                                                                                                                                                                                                                                                                                                                                                                                                                       | 3                         | 0.875        |
| CTL-MPV-2 | 2          | G1, I2, G3, D4, P5, V6, T7, C8, L9, K10, S11, G12, A13, I14, C15, H16, P17, V18, F19, C20, P21, R22, R23, Y24, K25, Q26, I27, G28, T29, C30, G31, L32, P33, G34, T35, K36, C37, C38, K39, K40, P41, E42, A43, A44, A45, K46, N47, Q48, R49, N50, A51, P52, R53, I54, T55, F56, G57, G58, P59, S60, G61, G62, G63, G64, S65, R66, S67, K68, Q69, R70, R71, P72, Q73, G74, L75, P76, N77, N78, T79, A80, S81, W82, F83, T84, A85, L86, T87, H89, K91, G92, G93, G94, G95, S96, N97, S98, S99, P100, D101, D102, Q103, I104, G105, Y106, Y107, I114, D118, G119                                                                                                                                                                                                           | 108                       | 0.777        |
| CTL-MPV-2 | 3          | Q526, T527, Y528, G529, G530, G531, G532, S533, A534, G547, S548, V549, D550, T551, D552, F553, V554, N555, E556, F557, Y558, A559, Y560, L561, H564, F565, S566, M567, G569, A577, N578, G579, Q580, V581, F582, G583, L584, Y585, G586, G587, G588, G589, S590, I591, P592, L593, M594, Y595, K596, G597, L598, P599, W600, N601, V602, V603, R604, G605, G606, G607, G608, S609, Y610, V611, M612, H613, A614, N615, Y616, I617, F618, W619, E620, A621, A622, A623, K624, G625, I626, I627, N628, T629, L630, Q631, K632, Y633, Y634, C635, R636, V637, R638, G639, G640, R641, C642, A643, V644, L645, S646, C647, L648, P649, K650, E651, E652, Q653, I654, G655, K656, C657, S658, T659, R660, G661, R662, K663, C664, C665, R666, H671, H672, H673, H674, H675 | 124                       | 0.737        |
| CTL-MPV-2 | 4          | E188, L189, I190, R191, Q192, G193, T194, D195                                                                                                                                                                                                                                                                                                                                                                                                                                                                                                                                                                                                                                                                                                                         | 8                         | 0.665        |
| CTL-MPV-2 | 5          | T247, F248, P249, P250, T251, E252, P253, K254, K255, G256, G257, G258, G259, G272, G273, G274, G275, S276, E277, T278, T292, Q293, V294, V295, D296, M297, M299, Y301, M311, G312, T313, L314, S315, Y316, E317, Q318, F319, G320, G321, L325, F330, L331, A332, Y333, I334, L335, F336, T337, R338, F339, F340, Y341, G343, I351, F352, F353, A354, S355, F356, Y357, Y358, W360, K361, S362, Y363, G364, G365, G366, G367, S375, S376, T377, F378, N379, V380, P381, M382, E383, G385, G386, G387, G388, S389, C390, R397, F398, R399, R400, A401, F402, G403, G404, G405, G406, L414, V415, P416, I419, I421, A422, Y436, V442, G444, G445, G446, G447, S448, L449, P450, S451, G465                                                                               | 111                       | 0.626        |
| CTL MPV   | <b>No.</b> | <b>B Cell Discontinuous Epitopes residues</b>                                                                                                                                                                                                                                                                                                                                                                                                                                                                                                                                                                                                                                                                                                                          | <b>Number of residues</b> | <b>Score</b> |
| CTL-MPV-3 | 1          | L9, K10, S11, I14, V18, F19, C20, P21, R22, R23, Y24, K25, Q26, I27, G28, T29, C30, G31, L32, P33, G34, T35, K36, C37, C38, K39, K40, P41, E42, A43, A44, A45, K46, S47, E48, E49, T50, G51, T52, L53, I54, V55, N56, S57, V58, L60, F61, F64, R231, G232, G233, G234, G235, S236, Y237, F238, C240, W241, Y274, L277, Y278, S279, T280, Q281, L282, S283, T284, D285, G287, V288, V291, E316, I317, L319, I320, I321, M322, R323, T324, F325, K326, V327, S328, I329, W330, N331, L332, D333, Y334, I335, I336, G337, G338, G339, G340, S341, M342, K343, I344, I345, L346, F347, L348, A349, L350, I351, T352, L353, A354, T355, C356, E357, L358, Y359, H360                                                                                                        | 115                       | 0.743        |
| CTL-MPV-3 | 2          | I118, F119, T120, I121, G122, L126, K127, G128, G129, G130, G131, S132, T133, I134, P135, I136, R542, V543, G544, A545, R546, K547, S548, A549, P550, L551, I552, I564, D565, I566, G567, N568, Y569, T570, V571, N579, Q581, E582, P583, G586, S587, V590, R591, C592, S593, F594, Y595, E596, D597, F598, L599, E600, Y601, D603, V604, R605, V606, V607, L608, G612, S613, I617, F620, F624, Y627, S628, L629, L630, L631, C632, R633, E634, A635, A636, A637, K638, G639, I640, I641, N642, T643, L644, Q645, K646, Y647, Y648, C649, R650, V651, R652, G653, G654, R655, C656, A657, V658, L659, S660, C661, L662, P663, K664, E665, E666, I668, G669, K670, C671, S672, T673, G675, R676, K677, C678, C679, R680, K682, K683, H684, H685, H686, H687, H688, H689 | 124                       | 0.724        |
| CTL-MPV-3 | 3          | G188, G189, G190, S420, P421, F424, I425, R426, G427, G428, S431, E432, Q434, E435, L436, Y437, S438, P439, L481, L482, F483, L484, V485, L486, I487, M488, L489, I490, I491, F492, W493, F494, S495, L496, E497, L498, G499, G500, G501, G502, S503, M504, K505, F506, L507, V508, L510, G511, I512, T514, T515                                                                                                                                                                                                                                                                                                                                                                                                                                                       | 51                        | 0.716        |
| CTL-MPV-3 | 4          | L152, A153, V154, F155, Q156, S157, A158, S159, K160, I161, I162, T163, R167                                                                                                                                                                                                                                                                                                                                                                                                                                                                                                                                                                                                                                                                                           | 13                        | 0.713        |
| CTL-MPV-3 | 5          | N106, S107, S108, R109, G110, G111, G112, G113, S114, M116, R117, Q137                                                                                                                                                                                                                                                                                                                                                                                                                                                                                                                                                                                                                                                                                                 | 12                        | 0.689        |
| CTL-MPV-3 | 6          | S304, L307, V308, D309, G362, G363, G364, G365, S366, L368, K369, E370, P371, C372, S373, S374, G375, T376, Y377, E378, G379, A387, D388, N389, K390, F391, A392                                                                                                                                                                                                                                                                                                                                                                                                                                                                                                                                                                                                       | 27                        | 0.596        |

|           |   |                                                                                                                  |    |       |
|-----------|---|------------------------------------------------------------------------------------------------------------------|----|-------|
| CTL-MPV-3 | 7 | T71, L75, T76, L78, R79, L80, C81, A82, Y83, G84, G85, G86, G522, G523, S524, Y525, V526, V527, D528, S537, K538 | 21 | 0.586 |
|-----------|---|------------------------------------------------------------------------------------------------------------------|----|-------|

**Supplementary Table S13:** B cell linear epitopes screened from HTL MPVs.

| HTL MPV   | No. | Chain | Start | End | B Cell Linear Epitopes                                                | Number of residues | Score |
|-----------|-----|-------|-------|-----|-----------------------------------------------------------------------|--------------------|-------|
| HTL-MPV-1 | 1   | —     | 273   | 312 | CGGGGSYADSFVIRGDEVRQIAPQGQGGGSVVVLSFELLH                              | 40                 | 0.736 |
| HTL-MPV-1 | 2   | —     | 504   | 532 | YTGAIKLDDKGGGGSSDFVRATAPIQ                                            | 29                 | 0.783 |
| HTL-MPV-1 | 3   | —     | 184   | 211 | KGGGGGINITRFQTLALHRSYLT PGD                                           | 28                 | 0.749 |
| HTL-MPV-1 | 4   | —     | 129   | 155 | SQRVAGDSGGGGSSKTQSLIVNNATN                                            | 27                 | 0.71  |
| HTL-MPV-1 | 5   | —     | 549   | 571 | ALVYFLQSFVGGGGSDTGV E H                                               | 23                 | 0.783 |
| HTL-MPV-1 | 6   | —     | 234   | 256 | PTE SIVRFPNITNLCPFGGGGS                                               | 23                 | 0.672 |
| HTL-MPV-1 | 7   | —     | 461   | 482 | PQGTTLGGGGSWPQIAQFAPSA                                                | 22                 | 0.775 |
| HTL-MPV-1 | 8   | —     | 419   | 440 | GGSDDQIGYRRATRRIRGGDG                                                 | 22                 | 0.697 |
| HTL-MPV-1 | 9   | —     | 162   | 179 | EGGGGSREFVFKNIDGYF                                                    | 18                 | 0.813 |
| HTL-MPV-1 | 10  | —     | 109   | 124 | LFARGGGGSSRTLSYY                                                      | 16                 | 0.635 |
| HTL-MPV-1 | 11  | —     | 488   | 500 | MSRGGGGSTPSGT                                                         | 13                 | 0.632 |
| HTL-MPV-1 | 12  | —     | 634   | 644 | CRRKHHHHHH                                                            | 11                 | 0.764 |
| HTL-MPV-1 | 13  | —     | 618   | 628 | PK EEQIGKCST                                                          | 11                 | 0.614 |
| HTL-MPV-1 | 14  | —     | 579   | 587 | KIVDEPEEH                                                             | 9                  | 0.809 |
| HTL-MPV-1 | 15  | —     | 449   | 457 | NPANNAAIV                                                             | 9                  | 0.653 |
| HTL-MPV-1 | 16  | —     | 54    | 60  | LAFVVFL                                                               | 7                  | 0.594 |
| HTL MPV   | No. | Chain | Start | End | B Cell Linear Epitopes                                                | Number of residues | Score |
| HTL-MPV-2 | 1   | —     | 567   | 591 | GSEILLIMRTFKVSIWNLDYIINL                                              | 25                 | 0.793 |
| HTL-MPV-2 | 2   | —     | 646   | 663 | IFWFSLELGGGGCTQH Q                                                    | 18                 | 0.786 |
| HTL-MPV-2 | 3   | —     | 184   | 198 | EWFLAYILFTRFFVY                                                       | 15                 | 0.782 |
| HTL-MPV-2 | 4   | —     | 690   | 757 | PFTIYSLLLCRMEAAAKGIINTLQKYICRVRGGRCAVLSCLPK EEQIGKCSTRGRKCCRRKHHHHHHH | 68                 | 0.761 |
| HTL-MPV-2 | 5   | —     | 22    | 44  | RRYKIGT CGLPGTKCKKPEAA                                                | 23                 | 0.752 |
| HTL-MPV-2 | 6   | —     | 1     | 15  | GIGDPVTLKSGAIC                                                        | 15                 | 0.749 |
| HTL-MPV-2 | 7   | —     | 210   | 219 | SYFAVHFISN                                                            | 10                 | 0.728 |
| HTL-MPV-2 | 8   | —     | 248   | 265 | FYYWKSIVGGGGSWLKQ                                                     | 18                 | 0.712 |
| HTL-MPV-2 | 9   | —     | 385   | 402 | GGSQAIASEFSSLP SYAA                                                   | 18                 | 0.698 |
| HTL-MPV-2 | 10  | —     | 456   | 475 | SFVNEFYAYLRKHF SMMILG                                                 | 20                 | 0.674 |
| HTL-MPV-2 | 11  | —     | 421   | 434 | AKNRARTGGGGSRA                                                        | 14                 | 0.667 |
| HTL-MPV-2 | 12  | —     | 294   | 306 | SAVGNICYTPSKL                                                         | 13                 | 0.633 |
| HTL-MPV-2 | 13  | —     | 615   | 628 | ELYGGGGSLSLIDF                                                        | 14                 | 0.579 |
| HTL-MPV-2 | 14  | —     | 556   | 562 | NPIQLSS                                                               | 7                  | 0.555 |

**Supplementary Table S14:** B cell Discontinuous epitopes screened from HTL MPVs.

| HTL MPV   | No. | B Cell Discontinuous Epitope residues                                                                                                                                                                                                                                                                                                                                                                       | Number of residues | Score |
|-----------|-----|-------------------------------------------------------------------------------------------------------------------------------------------------------------------------------------------------------------------------------------------------------------------------------------------------------------------------------------------------------------------------------------------------------------|--------------------|-------|
| HTL-MPV-1 | 1   | M413, G419, G420, S421, D422, D423, Q424, I425, G426, Y427, Y428, R430, A431, T432, R433, R434, I435, R436, G437, G438, D439, G440, N449, P450, A451, N452, N453, A454, A455, I456, V457, L460, P461, Q462, G463, T464, T465, L466, G467, G468, G469, G470, S471, W472, P473, Q474, I475, A476, Q477, F478, A479, P480, S481, A482, S483, M488, S489, R490, G491, G492, G493, G494, S495, T496, P497, S498, | 121                | 0.727 |

|                |            |                                                                                                                                                                                                                                                                                                                                                                                                                                                                                                                                                                                                                                                                                                                                                                                                   |                           |              |
|----------------|------------|---------------------------------------------------------------------------------------------------------------------------------------------------------------------------------------------------------------------------------------------------------------------------------------------------------------------------------------------------------------------------------------------------------------------------------------------------------------------------------------------------------------------------------------------------------------------------------------------------------------------------------------------------------------------------------------------------------------------------------------------------------------------------------------------------|---------------------------|--------------|
|                |            | G499, T500, Y504, T505, G506, A507, I508, K509, L510, D511, D512, K513, D514, G515, G516, G517, G518, S519, S520, D521, F522, V523, R524, A525, T526, A527, T528, I529, P530, I531, Q532, L547, A549, L550, V551, Y552, F553, L554, Q555, S556, I557, N558, F559, V560, G561, G562, G563, G564, S565, D566, T567, G568, V569, E570, V572                                                                                                                                                                                                                                                                                                                                                                                                                                                          |                           |              |
| HTL-MPV-1      | 2          | V261, L262, Y263, N264, S265, A266, S267, F268, C273, G274, G275, G276, G277, S278, Y279, A280, D281, S282, F283, V284, I285, R286, G287, D288, E289, V290, R291, Q292, I293, A294, P295, G296, Q297, G298, G299, G300, G301, S302, V303, V304, V305, L306, S307, F308, T331, N332                                                                                                                                                                                                                                                                                                                                                                                                                                                                                                                | 46                        | 0.716        |
| HTL-MPV-1      | 3          | I596, N597, T598, L599                                                                                                                                                                                                                                                                                                                                                                                                                                                                                                                                                                                                                                                                                                                                                                            | 4                         | 0.703        |
| HTL-MPV-1      | 4          | L54, A55, F56, V57, V58, F59, L60, K75, F78, L79, L82, W83, V85, T86, L87, L109, F110, A111, R112, G113, G114, G115, G116, S117, S118, R119, T120, L121, S122, Y124, A128, S129, Q130, R131, V132, A133, G134, D135, S136, G137, G138, G139, G140, S141, S142, K143, T144, Q145, S146, L147, L148, I149, V150, N151, N152, A153, T154, N155, E162, G163, G164, G165, G166, S167, R168, E169, F170, V171, F172, N174, I175, D176, G177, Y178, F179, K184, G185, G186, G187, G188, S189, G190, I191, N192, I193, T194, R195, F196, Q197, T198, L199, L200, A201, L202, H203, R204, S205, Y206, L207, T208, P209, G210, D211, A218, G219, A220, A221, Y227, G228, P234, T235, E236, I238, V239, R240, F241, P242, N243, I244, T245, N246, L247, C248, P249, F250, G251, G252, G253, G254, G255, S256 | 131                       | 0.682        |
| HTL-MPV-1      | 5          | Y603, C604, V606, C634, R635, R636, H639, H640, H643, H644                                                                                                                                                                                                                                                                                                                                                                                                                                                                                                                                                                                                                                                                                                                                        | 10                        | 0.675        |
| HTL-MPV-1      | 6          | G1, I2, G368, G369, G370, S371, R372, K579, I580, V581, D582, E583, P584, E585, E586, H587, P618, K619, E620, E621, Q622, G624, K625, C626, S627, T628, R629, G630, R631, C633, K637, K638, H641                                                                                                                                                                                                                                                                                                                                                                                                                                                                                                                                                                                                  | 33                        | 0.652        |
| HTL-MPV-1      | 7          | F19, C20, P21, R22                                                                                                                                                                                                                                                                                                                                                                                                                                                                                                                                                                                                                                                                                                                                                                                | 4                         | 0.52         |
| HTL-MPV-1      | 8          | E309, L310, L311, H312, P343, V344, S345, G346, G347, G348, G349, S350, Q351                                                                                                                                                                                                                                                                                                                                                                                                                                                                                                                                                                                                                                                                                                                      | 13                        | 0.517        |
| <b>HTL MPV</b> | <b>No.</b> | <b>B Cell Discontinuous Epitope residues</b>                                                                                                                                                                                                                                                                                                                                                                                                                                                                                                                                                                                                                                                                                                                                                      | <b>Number of residues</b> | <b>Score</b> |
| HTL-MPV-2      | 1          | F19,R23,K25,Q26,I27,G28,T29,C30,G31,L32,P33,G34,T35,K36,C37,C38,K39,K40,P41,E42,A43,A44,K46,V61,E62,T63,G64,G65,G66,G67,S68,E74,A76,V78,V79,R80,F83,S84,G85,G86,G87,G88,S89,T90,L91,E92,E93,T94,K95,F96,L97,T98,E99,N100,L101,L102,L103,Y104,I105,D106,I107,N108,G109,G110,G111,G112,S113,V114,Q115,Q116,E117,S118,P119,F120,V121,M122,M123,S124,A125,P126,P127,A128,Q129,Y130,E131,L132,G133,G134,G135,G136,S137,L138,L139,Q140,L141,C142,T143,F144,T145,S147,T148,N149,S150,R151,A154,S155,G157,G158,G159,G160,S161,S162,K163,L164,S183,E184,W185,F186,L187,A188,Y189,I190,L191,F192,T193,R194,F195,F196,Y197,V198                                                                                                                                                                              | 130                       | 0.755        |
| HTL-MPV-2      | 2          | G453,S456,F457,V458,N459,E460,Y462,A463,Y464,L465,R466,K467,H468,F469,S470,M471,M472,I473,L474,G475,G476,G564,G565,G566,G567,S568,E569,I570,L571,L572,I573,I574,M575,R576,T577,F578,K579,V580,S581,I582,W583,N584,L585,D586,Y587,I588,I589,N590,L591,K594,Y617,G618,G619,G620,G621,S622,L623,S624,L625,I626,D627,F628,I646,F647,W648,F649,S650,L651,E652,L653,G654,G655,G656,G657,S658,C659,T660,Q661,H662,Q663,P664,Y683,V686,F687,P690,F691,T692,I693,Y694,S695,L696,L697,L698,C699,R700,E702,A703,A704,A705,K706,G707,I708,I709,N710,T711,L712,Q713,K714,Y715,C717,R718,V719,R720,G721,G722,R723,C724,A725,V726,L727,S728,C729,L730,P731,K732,E733,E734,Q735,I736,G737,K738,C739,S740,T741,R742,G743,R744,K745,C746,C747,R748,K750,K751,H752,H753,H755,H756,H757                               | 148                       | 0.724        |

|           |   |                                                                                                                                                                                                                                                                                                                                                         |    |       |
|-----------|---|---------------------------------------------------------------------------------------------------------------------------------------------------------------------------------------------------------------------------------------------------------------------------------------------------------------------------------------------------------|----|-------|
| HTL-MPV-2 | 3 | S294,A295,V296,G297,I299,C300,Y301,G384,G385,G386,S387,Q388,A389,I390,A391,S392,E393,F394,S395,S396,L397,P398,S399,Y400,A401,A402,K416,Y417,A418,A421,K422,R424,A425,R426,T427,G428,G429,G430,G431,S432,R433,A434                                                                                                                                       | 42 | 0.666 |
| HTL-MPV-2 | 4 | G1,I2,G3,D4,P5,V6,T7,C8,L9,K10,S11,G12,A13,I14,C15,V18,R22,M205,L207,S210,Y211,F212,A213,V214,H215,F216,I217,S218,N219,F248,Y249,V251,W252,K253,S254,Y255,V256,G257,G258,G259,G260,S261,W262,L263,K264,Q265,K268,L282,I283,T284,P285,V286,H287,G288,G289,G290,G291,S292,T302,P303,S304,K305,L306,T332,L334,G335,G336,G337,G338,S339,F340,T341,Q365,T367 | 74 | 0.638 |
| HTL-MPV-2 | 5 | N556,P557,I558,Q559,L560,S561,S562                                                                                                                                                                                                                                                                                                                      | 7  | 0.555 |

**Supplementary Table S15:** Analysis of codon-optimized cDNA of all the MPVs.

| S.No. | MPVs         | GC content | CAI (Codon Adaptation Index) score | Tandem rare codons |
|-------|--------------|------------|------------------------------------|--------------------|
| 1     | CTL-MPV-1    | 67.84%     | 1                                  | 0%                 |
| 2     | CTL-MPV-2    | 69.72%     | 1                                  | 0%                 |
| 3     | CTL-MPV-3    | 66.22%     | 1                                  | 0%                 |
| 4     | HTL-MPV-1    | 71.10%     | 1                                  | 0%                 |
| 5     | HTL-MPV-2    | 66.58%     | 1                                  | 0%                 |
|       | Ideal values | 30-70%     | 0.8-1.0                            | <30%               |
